# Supplementary material
Source: publisher figshare collection journal article supplement (https://acs.figshare.com/ndownloader/files/12547664)
Supplement: Supplementary file 1 [file 12547664]

## Sheet: Table S6 Title
Table S6. Protein Intensities and Fold Enrichments for MALAT1, NEAT1, and NORAD Protein Interactomes.
(In Reference to Results Section and Figure 3)

## Sheet: Protein Intensities
Protein IDs	Gene names	Peptides Lysate I	Peptides Scrambled I	Peptides Norad I	Peptides Neat I	Peptides Malat I	Peptides Lysate II	Peptides Scrambled II	Peptides Norad II	Peptides Neat II	Peptides Malat II	Peptides Lysate III	Peptides Scrambled III	Peptides Norad III	Peptides Neat III	Peptides Malat III	LFQ Intensity Lysate I	LFQ Intensity Scrambled I	LFQ Intensity Norad I	LFQ Intensity Neat I	LFQ Intensity Malat I	LFQ Intensity Lysate II	LFQ Intensity Scrambled II	LFQ Intensity Norad II	LFQ Intensity Neat II	LFQ Intensity Malat II	LFQ Intensity Lysate III	LFQ Intensity Scrambled III	LFQ Intensity Norad III	LFQ Intensity Neat III	LFQ Intensity Malat III
A0A0A0MRZ7;A0A075B6S6;A0A075B6S2;A0A075B6P5;A0A087WW87;P06310;P01615;P01614	IGKV2D-26;IGKV2D-30;IGKV2D-29;IGKV2D-28;IGKV2-40	0	1	1	1	0	0	0	1	1	1	0	1	0	0	1	0	0	0	0	0	0	0	0	0	0	0	0	0	0	0
A0A0A0MRZ8;P04433	IGKV3D-11	0	1	0	0	1	0	1	1	1	0	0	1	0	0	0	0	0	0	0	0	0	0	0	0	0	0	101080000	0	0	0
A0A0C4DH25;P01619	IGKV3D-20	0	1	1	0	1	0	1	1	1	1	0	1	0	0	0	0	0	0	0	0	0	0	0	0	0	0	162740000	0	0	0
A0A0C4DH42	IGHV3-66	1	1	0	0	0	0	1	0	1	0	0	1	0	0	0	19190000	0	0	0	0	0	0	0	0	0	0	0	0	0	0
A0A0C4DH55;P01624	IGKV3D-7	0	1	1	0	1	0	1	0	0	0	0	1	0	0	0	0	0	0	0	0	0	0	0	0	0	0	123800000	0	0	0
A0A183	LCE6A	0	0	0	0	1	0	0	0	0	0	0	0	0	0	0	0	0	0	0	0	0	0	0	0	0	0	0	0	0	0
A0AVT1	UBA6	13	0	8	0	0	6	0	7	2	0	4	0	1	0	0	128010000	0	37184000	0	0	70594000	0	38832000	17705000	0	44720000	0	0	0	0
A0FGR8	ESYT2	7	1	7	0	0	13	1	8	3	0	7	0	8	0	0	151260000	0	100470000	0	0	122560000	0	73587000	72882000	0	106150000	0	104510000	0	0
A0MZ66	KIAA1598	0	0	0	0	0	1	0	0	0	0	0	0	0	0	0	0	0	0	0	0	0	0	0	0	0	0	0	0	0	0
A1L0T0	ILVBL	8	0	6	0	1	11	0	4	2	0	3	0	3	0	0	195090000	0	83888000	0	0	157530000	0	62306000	104770000	0	112750000	0	93709000	0	0
A2RRP1	NBAS	0	0	1	0	0	2	0	0	0	0	0	0	1	0	0	0	0	0	0	0	12202000	0	0	0	0	0	0	0	0	0
A2RUS2	DENND3	1	0	1	0	0	0	0	0	0	0	0	0	0	0	0	6581500	0	0	0	0	0	0	0	0	0	0	0	0	0	0
A3KMH1	VWA8	1	0	0	0	0	0	0	3	1	0	0	0	2	0	0	0	0	0	0	0	0	0	10556000	0	0	0	0	14430000	0	0
A5YKK6	CNOT1	7	0	7	0	0	12	0	9	4	1	4	1	8	0	0	41893000	0	49477000	0	0	67231000	0	75109000	34212000	0	43031000	0	57024000	0	0
A6NC42	DPPA5	0	0	0	0	0	0	0	0	0	0	0	1	0	0	0	0	0	0	0	0	0	0	0	0	0	0	12845000	0	0	0
Q9GZQ8;A6NCE7;Q9H492	MAP1LC3B;MAP1LC3B2;MAP1LC3A	2	0	2	0	0	0	0	0	0	0	0	0	0	0	0	26142000	0	23115000	0	0	0	0	0	0	0	0	0	0	0	0
A6NDG6	PGP	3	0	2	0	0	3	0	1	0	0	1	0	0	0	0	18233000	0	12560000	0	0	25094000	0	0	0	0	0	0	0	0	0
A6NHL2	TUBAL3	3	2	4	0	2	4	3	4	4	3	3	3	4	2	1	0	0	0	0	0	0	0	0	0	0	0	0	0	0	0
A6NHQ2	FBLL1	2	2	2	1	2	2	2	3	2	2	2	1	2	1	2	0	0	0	0	0	0	134490000	0	0	0	0	0	0	0	0
A6NHR9	SMCHD1	16	0	9	0	0	12	9	32	21	13	5	0	20	4	1	146490000	0	99438000	0	0	112020000	103390000	519550000	273620000	182080000	72778000	0	193510000	41284000	0
A6NKT7;Q7Z3J3;O14715;Q99666;P0DJD0;P0DJD1	RGPD3;RGPD4;RGPD8;RGPD5	7	0	6	0	0	10	0	6	5	0	3	0	4	0	0	0	0	0	0	0	0	0	0	0	0	17924000	0	0	0	0
A7E2V4	ZSWIM8	0	0	0	0	0	1	0	0	0	0	0	0	0	0	0	0	0	0	0	0	7160000	0	0	0	0	0	0	0	0	0
A8CG34;Q6PJE2;A6NF01;Q96HA1	POM121C	1	0	0	0	0	1	0	1	0	0	0	0	0	0	0	0	0	0	0	0	0	0	8475100	0	0	0	0	0	0	0
A8MQ03	CYSRT1	0	0	0	1	0	0	0	0	0	0	0	0	0	0	0	0	0	0	12593000	0	0	0	0	0	0	0	0	0	0	0
Q9BYP9;Q9BYQ3;Q9BYQ0;A8MTY7;Q9BYQ4	KRTAP9-9;KRTAP9-3;KRTAP9-8;KRTAP9-7;KRTAP9-2	0	0	0	1	0	0	0	0	0	0	0	0	0	0	0	0	0	0	69378000	0	0	0	0	0	0	0	0	0	0	0
A8MUX0	KRTAP16-1	0	0	0	2	0	0	0	0	0	5	0	0	0	0	0	0	0	0	160700000	0	0	0	0	0	138230000	0	0	0	0	0
P62308;A8MWD9	SNRPG;SNRPGP15	2	1	2	0	1	1	1	2	2	2	0	2	2	2	2	0	0	32378000	0	0	0	0	37079000	38754000	76990000	0	41995000	0	39545000	0
B3EWG6;B3EWG5;B3EWG4;B3EWG3	FAM25G;FAM25C;FAM25BP;FAM25A	0	0	0	0	0	0	0	0	0	0	0	3	0	0	0	0	0	0	0	0	0	0	0	0	0	0	174170000	0	0	0
P0CG08;B7ZAQ6	GPR89B;GPR89A	0	0	2	0	0	2	0	3	2	0	0	0	3	1	0	0	0	19697000	0	0	30131000	0	19923000	17829000	0	0	0	35212000	0	0
B9A064;P0CG04	IGLL5;IGLC1	0	4	3	1	3	0	3	3	2	3	0	3	2	1	2	0	82813000	0	0	0	0	0	0	0	0	0	0	0	0	0
C4AMC7;Q6VEQ5;Q9NQA3;A8K0Z3;A8MWX3	WASH3P;WASH2P;WASH6P;WASH1;WASH4P	0	0	2	0	0	1	0	1	1	0	0	0	0	0	0	0	0	15431000	0	0	0	0	0	0	0	0	0	0	0	0
C9JLW8	FAM195B	0	0	1	0	0	1	0	0	0	0	0	0	0	0	0	0	0	0	0	0	0	0	0	0	0	0	0	0	0	0
E9PRG8	C11orf98	0	0	0	0	0	1	1	0	1	0	1	0	0	1	0	0	0	0	0	0	0	0	0	0	0	44762000	0	0	0	0
O00116	AGPS	9	0	8	0	0	10	0	6	4	0	2	0	6	0	0	114140000	0	77387000	0	0	114480000	0	56441000	43086000	0	51164000	0	58556000	0	0
O00139;Q99661	KIF2A	1	0	1	0	0	2	0	2	1	1	1	0	1	0	0	0	0	0	0	0	0	0	16187000	0	0	0	0	0	0	0
O00159	MYO1C	17	1	21	0	2	25	2	22	16	1	8	3	16	4	1	292570000	0	237410000	0	42695000	473520000	20839000	266430000	252940000	0	130780000	50565000	289210000	42094000	0
O00161	SNAP23	0	0	2	0	1	3	0	1	1	0	3	0	1	1	0	0	0	32500000	0	0	35016000	0	0	0	0	32987000	0	0	0	0
O00165	HAX1	0	0	0	0	0	3	0	0	0	0	1	0	0	0	0	0	0	0	0	0	29985000	0	0	0	0	0	0	0	0	0
O00170	AIP	8	0	7	1	2	7	1	6	3	1	5	0	2	2	0	175260000	0	149910000	0	57431000	155210000	0	90531000	88792000	0	126020000	0	0	49030000	0
O00178	GTPBP1	2	0	3	0	1	2	0	1	1	0	2	0	0	0	0	8817300	0	0	0	0	11376000	0	0	0	0	12547000	0	0	0	0
O00186	STXBP3	4	0	1	0	0	2	0	1	1	1	2	0	1	0	0	20990000	0	0	0	0	25072000	0	0	0	0	0	0	0	0	0
O00193	SMAP	0	0	0	0	0	0	0	0	0	0	0	0	0	0	0	0	0	0	0	0	0	0	0	0	0	0	0	0	0	0
O00194;P51159	RAB27B	4	0	2	0	0	0	0	0	0	0	1	1	0	0	0	64184000	0	0	0	0	0	0	0	0	0	0	0	0	0	0
O00203;Q13367	AP3B1	8	0	10	0	0	11	0	5	4	0	6	0	3	1	0	81054000	0	67895000	0	0	119210000	0	41943000	48245000	0	110860000	0	49364000	0	0
O00204	SULT2B1	0	0	0	0	0	0	1	0	0	0	0	9	0	0	0	0	0	0	0	0	0	0	0	0	0	0	587380000	0	0	0
O00217	NDUFS8	1	0	0	0	0	0	0	0	0	0	0	0	1	0	0	0	0	0	0	0	0	0	0	0	0	0	0	0	0	0
O00219;Q92819	HAS3	4	0	7	0	2	2	0	2	1	0	1	0	3	0	0	0	0	0	0	0	0	0	22785000	0	0	0	0	41118000	0	0
O00231	PSMD11	18	1	12	0	2	15	1	7	4	0	10	6	4	0	0	430050000	0	251240000	0	32922000	324970000	0	138820000	120650000	0	297440000	164820000	58112000	0	0
O00232	PSMD12	9	0	8	0	1	9	0	4	6	0	4	0	3	0	0	87075000	0	92227000	0	0	155160000	0	68503000	84728000	0	126530000	0	33347000	0	0
O00233	PSMD9	3	0	3	0	0	2	0	2	4	0	1	0	1	0	0	27635000	0	26491000	0	0	26034000	0	33169000	31461000	0	0	0	0	0	0
O00255	MEN1	0	0	1	0	0	0	0	1	1	0	0	0	0	0	0	0	0	0	0	0	0	0	8080900	0	0	0	0	0	0	0
O00264	PGRMC1	3	1	5	0	1	5	1	4	4	0	4	0	4	1	0	216290000	0	172340000	0	0	330670000	0	110470000	106850000	0	413360000	0	98739000	0	0
O00267	SUPT5H	4	0	1	0	0	2	0	2	2	2	1	0	2	2	0	25999000	0	0	0	0	21230000	0	37178000	25557000	31526000	0	0	33176000	0	0
O00273	DFFA	0	0	0	0	0	1	0	0	0	0	0	0	0	0	0	0	0	0	0	0	0	0	0	0	0	0	0	0	0	0
O00330	PDHX	1	0	1	0	0	1	0	3	0	0	1	0	0	0	0	0	0	0	0	0	0	0	20514000	0	0	0	0	0	0	0
O00341	SLC1A7	0	1	1	1	1	0	1	1	1	1	0	1	1	1	1	0	0	0	0	0	0	0	0	0	0	0	0	13107000	0	0
O00391	QSOX1	1	3	2	1	2	0	1	2	2	1	0	2	0	0	0	0	40578000	16838000	0	27538000	0	0	0	0	0	0	64743000	0	0	0
O00400	SLC33A1	1	0	2	1	1	0	1	2	1	1	1	0	3	2	0	0	0	0	0	0	0	0	0	0	0	0	0	26286000	19200000	0
O00401	WASL	0	0	1	0	0	1	0	0	0	0	0	0	0	0	0	0	0	0	0	0	0	0	0	0	0	0	0	0	0	0
O00411	POLRMT	0	0	1	0	0	5	0	2	0	0	2	0	2	0	0	0	0	0	0	0	15516000	0	0	0	0	0	0	0	0	0
O00422	SAP18	1	0	0	0	0	2	0	3	3	3	0	0	2	1	0	0	0	0	0	0	55245000	0	32953000	31365000	46563000	0	0	0	0	0
O00425	IGF2BP3	2	0	4	0	2	3	0	4	3	3	2	1	2	2	1	324310000	0	0	0	0	58456000	0	31054000	24684000	0	0	0	41159000	0	0
O00429	DNM1L	6	0	3	0	0	6	0	2	0	0	2	0	0	0	0	35968000	0	0	0	0	52229000	0	16723000	0	0	44638000	0	0	0	0
O00442	RTCA	1	0	1	0	0	1	0	1	0	0	0	0	0	0	0	0	0	0	0	0	9013600	0	0	0	0	0	0	0	0	0
O00443	PIK3C2A	0	0	0	0	0	1	0	0	1	0	0	0	0	0	0	0	0	0	0	0	4633500	0	0	0	0	0	0	0	0	0
O00461	GOLIM4	1	0	0	0	0	3	0	0	0	0	1	0	0	0	0	0	0	0	0	0	0	0	0	0	0	0	0	0	0	0
O00468	AGRN	6	3	12	2	5	5	4	12	8	5	2	1	18	9	1	47206000	22902000	51889000	54280000	48317000	30687000	42538000	73383000	47188000	49255000	33695000	0	148720000	63551000	0
O00469	PLOD2	0	0	0	0	0	0	0	0	0	0	0	0	0	0	0	0	0	0	0	0	0	0	0	0	0	0	0	0	0	0
O00471	EXOC5	5	0	3	0	0	5	0	1	2	0	2	0	2	0	0	27849000	0	27237000	0	0	26362000	0	0	0	0	34076000	0	0	0	0
O00483	NDUFA4	2	0	1	0	0	2	0	2	1	0	1	0	1	0	0	86182000	0	0	0	0	152280000	0	75303000	0	0	0	0	0	0	0
O00487	PSMD14	5	1	5	1	2	3	1	2	3	1	1	3	3	0	0	129910000	0	154010000	0	72527000	107180000	0	60652000	102520000	0	0	118370000	77072000	0	0
O00499	BIN1	1	0	0	0	0	0	0	0	0	0	0	0	0	0	0	10541000	0	0	0	0	0	0	0	0	0	0	0	0	0	0
O00505	KPNA3	2	0	3	0	0	3	0	3	3	0	0	0	1	0	0	0	0	0	0	0	34341000	0	0	0	0	0	0	0	0	0
O00515	LAD1	0	0	0	0	0	0	0	0	0	0	0	2	0	0	0	0	0	0	0	0	0	0	0	0	0	0	32547000	0	0	0
O00541	PES1	4	0	2	0	1	4	1	5	4	1	0	0	2	0	0	33973000	0	25777000	0	0	28298000	0	54965000	51926000	0	0	0	28943000	0	0
O00560	SDCBP	5	0	2	0	0	0	0	0	0	0	0	0	0	0	0	62565000	0	42770000	0	0	0	0	0	0	0	0	0	0	0	0
O00566	MPHOSPH10	3	0	0	0	0	1	0	2	1	0	0	0	0	0	0	0	0	0	0	0	0	0	14272000	0	0	0	0	0	0	0
O00567	NOP56	16	3	13	0	6	12	3	18	14	4	6	2	14	3	1	369880000	55165000	305790000	0	124070000	164380000	64214000	355330000	255880000	104960000	89626000	19940000	275320000	28439000	0
O00592	PODXL	1	0	1	0	0	1	0	0	0	0	0	0	0	0	0	0	0	0	0	0	0	0	0	0	0	0	0	0	0	0
O00629	KPNA4	7	0	5	0	0	8	0	7	6	0	2	0	3	0	0	166770000	0	70187000	0	0	172350000	0	93725000	103260000	0	59959000	0	84147000	0	0
O00743	PPP6C	2	0	3	0	0	5	0	1	0	0	1	1	0	0	0	24159000	0	24816000	0	0	29019000	0	0	0	0	0	0	0	0	0
O00754	MAN2B1	4	0	3	0	0	6	0	1	0	0	5	0	2	0	0	40180000	0	40195000	0	0	44074000	0	0	0	0	60540000	0	0	0	0
O00763	ACACB	0	6	5	0	6	2	4	8	6	2	0	5	9	2	0	0	0	0	0	0	0	0	0	0	0	0	0	10616000	0	0
O00764	PDXK	2	0	1	0	0	2	0	1	1	0	1	1	1	0	0	0	0	0	0	0	51622000	0	0	0	0	0	0	0	0	0
O00767	SCD	0	0	0	0	0	2	0	1	1	0	0	0	0	0	0	0	0	0	0	0	0	0	0	18588000	0	0	0	0	0	0
O14495	PPAP2B	3	0	4	0	0	4	0	1	1	0	3	0	1	0	0	68319000	0	54121000	0	0	69768000	0	0	0	0	94903000	0	0	0	0
O14497	ARID1A	1	0	0	0	0	1	0	2	0	0	0	0	0	0	0	0	0	0	0	0	0	0	1353600	0	0	0	0	0	0	0
O14545	TRAFD1	1	0	0	0	0	1	0	3	2	0	1	0	0	0	0	0	0	0	0	0	0	0	0	0	0	0	0	0	0	0
O14569	CYB561D2	0	1	1	0	1	1	1	1	1	1	0	0	1	1	1	0	55680000	44111000	0	69508000	0	0	72545000	58300000	0	0	0	0	0	0
O14576	DYNC1I1	2	0	0	0	0	2	0	1	1	0	0	0	0	0	0	0	0	0	0	0	41421000	0	0	0	0	0	0	0	0	0
O14579	COPE	3	0	3	0	1	6	0	2	1	0	1	1	1	0	0	49695000	0	87173000	0	0	87453000	0	57709000	0	0	0	0	0	0	0
O14617	AP3D1	6	0	4	0	0	7	0	7	2	0	3	1	5	2	0	44502000	0	49941000	0	0	49899000	0	55768000	0	0	60065000	0	59552000	39993000	0
O14618	CCS	0	0	0	0	0	0	0	0	0	0	0	0	0	0	0	0	0	0	0	0	0	0	0	0	0	0	0	0	0	0
O14647;O14646	CHD2	1	0	0	0	2	0	1	2	0	1	0	0	0	0	1	0	0	0	0	0	0	0	8547600	0	0	0	0	0	0	0
O14653	GOSR2	1	0	1	0	0	1	0	1	1	0	0	0	0	0	0	0	0	0	0	0	0	0	17376000	0	0	0	0	0	0	0
O14656	TOR1A	0	0	0	0	0	2	0	0	0	0	1	0	0	0	0	0	0	0	0	0	16160000	0	0	0	0	0	0	0	0	0
O14672	ADAM10	0	0	0	0	0	0	0	0	0	1	0	0	0	0	0	0	0	0	0	0	0	0	0	0	0	0	0	0	0	0
O14681	EI24	0	6	6	1	4	0	3	5	4	4	0	2	5	3	1	0	221490000	102590000	0	164640000	0	91427000	96169000	95400000	114720000	0	0	122740000	108280000	0
O14732	IMPA2	0	3	1	1	1	0	1	1	1	1	0	1	1	1	1	0	59965000	0	0	0	0	0	0	0	0	0	0	0	0	0
O14734	ACOT8	4	0	3	0	1	3	0	2	3	1	0	0	2	1	0	49710000	0	58516000	0	0	61264000	0	50054000	51282000	0	0	0	95616000	0	0
O14735	CDIPT	1	0	2	1	0	1	0	2	0	0	1	0	1	1	0	0	0	30490000	0	0	0	0	20933000	0	0	0	0	0	0	0
O14737	PDCD5	1	0	1	0	0	3	0	0	0	0	2	0	0	0	0	0	0	0	0	0	27386000	0	0	0	0	17847000	0	0	0	0
O14744	PRMT5	3	2	7	1	6	8	3	6	3	0	0	2	4	1	0	71783000	0	73272000	0	50159000	69322000	0	69018000	76164000	0	0	56768000	48710000	0	0
O14745	SLC9A3R1	1	1	5	0	0	3	0	3	2	0	3	1	1	0	1	0	0	49483000	0	0	40614000	0	45937000	44565000	0	31923000	0	0	0	0
O14763	TNFRSF10B	0	0	0	0	0	1	0	0	0	0	0	0	0	0	0	0	0	0	0	0	4387800	0	0	0	0	0	0	0	0	0
O14773	TPP1	4	3	5	1	3	5	2	5	2	0	3	4	3	2	0	154850000	101220000	127670000	0	94493000	83897000	61060000	52626000	66882000	0	132410000	163840000	63537000	76355000	0
O14786	NRP1	14	2	15	0	1	18	3	14	11	1	10	1	12	4	1	488940000	63201000	381150000	0	0	554140000	83467000	307160000	250210000	0	542710000	0	309520000	138570000	0
O14787	TNPO2	6	0	6	0	0	11	1	6	3	1	2	0	6	0	0	41692000	0	0	0	0	66463000	0	0	0	0	37677000	0	26182000	0	0
O14802	POLR3A	1	1	1	0	0	4	0	1	1	0	0	0	1	0	0	0	0	0	0	0	30662000	0	0	0	0	0	0	0	0	0
O14817	TSPAN4	0	0	0	0	0	1	0	0	0	0	0	0	0	0	0	0	0	0	0	0	20566000	0	0	0	0	0	0	0	0	0
O14874	BCKDK	1	0	0	0	0	0	0	1	0	0	0	0	0	0	0	0	0	0	0	0	0	0	0	0	0	0	0	0	0	0
O14879	IFIT3	9	0	11	0	1	0	0	0	0	0	0	0	0	0	0	104700000	0	200950000	0	0	0	0	0	0	0	0	0	0	0	0
O14880	MGST3	3	0	1	0	0	4	1	2	1	1	2	1	3	1	0	0	0	0	0	0	150500000	0	75423000	0	0	84208000	0	62029000	0	0
O14893	GEMIN2	0	0	0	0	0	1	0	0	0	0	0	0	0	0	0	0	0	0	0	0	8965000	0	0	0	0	0	0	0	0	0
O14908	GIPC1	2	0	5	0	0	4	0	3	1	0	1	0	1	0	0	21389000	0	23268000	0	0	23224000	0	39547000	0	0	0	0	0	0	0
O14929	HAT1	2	0	1	0	0	0	0	1	0	0	0	0	0	0	0	20092000	0	0	0	0	0	0	0	0	0	0	0	0	0	0
O14933	UBE2L6	2	0	0	0	0	0	0	0	0	0	0	0	0	0	0	58533000	0	0	0	0	0	0	0	0	0	0	0	0	0	0
O14949	UQCRQ	2	0	2	0	0	3	0	1	0	0	3	0	2	0	0	66201000	0	42675000	0	0	132790000	0	0	0	0	159460000	0	54625000	0	0
P19105;O14950	MYL12A;MYL12B	9	3	7	3	4	9	2	6	4	0	3	6	5	2	0	522180000	115470000	372110000	192860000	153480000	473810000	0	195570000	149480000	0	286990000	476810000	241030000	0	0
O14964	HGS	3	0	4	0	1	4	0	2	2	0	3	1	2	0	0	32167000	0	37564000	0	0	28356000	0	27684000	29897000	0	50944000	0	25350000	0	0
O14967	CLGN	3	0	1	0	0	2	1	0	0	0	1	1	0	0	0	0	0	0	0	0	35207000	0	0	0	0	0	0	0	0	0
O14974	PPP1R12A	2	0	0	0	0	3	0	1	0	0	2	0	0	0	0	0	0	0	0	0	19346000	0	0	0	0	19822000	0	0	0	0
O14976	GAK	0	0	0	0	0	1	0	0	0	0	0	0	0	0	0	0	0	0	0	0	8353400	0	0	0	0	0	0	0	0	0
O14980	XPO1	22	1	20	1	4	21	4	20	13	2	7	6	12	6	1	912070000	0	493210000	0	48409000	763610000	51428000	434500000	352600000	19052000	254570000	95627000	251320000	105900000	0
O14983	ATP2A1	7	1	10	3	3	5	4	10	9	5	7	8	8	6	3	0	0	0	0	0	0	0	0	0	0	0	0	0	0	0
O15020	SPTBN2	7	1	12	0	2	10	3	6	3	1	4	20	3	2	0	26837000	0	21218000	0	0	39584000	0	10313000	12041000	0	19177000	341490000	9396200	0	0
O15027	SEC16A	2	0	5	0	0	2	0	3	0	0	0	0	0	0	0	0	0	12751000	0	0	0	0	0	0	0	0	0	0	0	0
O15031	PLXNB2	0	0	0	0	0	2	0	0	0	0	1	0	0	0	0	0	0	0	0	0	0	0	0	0	0	0	0	0	0	0
O15042	U2SURP	5	0	6	1	1	5	1	15	8	10	3	0	4	4	1	58495000	0	66226000	0	0	53694000	0	329470000	172570000	329610000	50602000	0	79952000	46900000	0
O15056	SYNJ2	3	0	2	0	0	1	0	1	0	0	0	0	0	0	0	0	0	0	0	0	0	0	0	0	0	0	0	0	0	0
O15061	SYNM	1	1	1	0	1	1	1	1	1	2	1	1	1	1	1	0	0	0	0	0	0	0	0	0	306050000	0	0	0	0	0
O15067	PFAS	3	0	0	0	0	2	0	0	0	0	0	0	0	0	0	17792000	0	0	0	0	10918000	0	0	0	0	0	0	0	0	0
O15116	LSM1	1	0	0	0	0	0	0	1	1	0	0	0	0	0	0	0	0	0	0	0	0	0	2821600	0	0	0	0	0	0	0
O15118	NPC1	16	1	9	0	4	9	0	5	6	0	7	0	3	0	0	562960000	0	316660000	0	131010000	157690000	0	60215000	72148000	0	199080000	0	74581000	0	0
O15121	DEGS1	3	1	2	0	1	1	0	1	0	0	0	0	0	0	0	18880000	0	22559000	0	0	0	0	0	0	0	0	0	0	0	0
O15126	SCAMP1	2	1	2	0	1	2	0	1	1	1	2	0	2	1	0	42283000	0	44305000	0	0	44797000	0	0	0	0	46570000	0	39773000	0	0
O15127	SCAMP2	0	1	2	0	1	0	0	0	0	0	1	0	1	0	0	0	0	31469000	0	0	0	0	0	0	0	0	0	0	0	0
O15143	ARPC1B	8	2	9	0	3	9	5	7	5	4	4	1	6	2	1	213620000	85250000	300780000	0	85794000	229260000	164930000	240950000	202190000	172130000	219760000	0	164770000	99684000	0
O15144	ARPC2	10	3	10	0	4	14	2	12	9	1	5	10	7	2	1	298200000	109890000	242810000	0	111280000	361450000	119880000	204260000	206320000	0	328760000	535760000	190840000	85502000	0
O15145	ARPC3	3	0	5	0	1	5	2	3	2	0	2	5	4	0	1	165770000	0	161540000	0	0	124040000	110410000	110630000	128970000	0	86919000	238070000	100680000	0	0
O15160	POLR1C	3	1	5	0	1	6	1	4	3	0	3	1	3	0	0	140820000	0	168270000	0	0	218210000	0	162380000	141240000	0	226290000	0	114800000	0	0
O15162	PLSCR1	3	0	2	0	0	1	0	0	0	0	1	0	0	0	0	0	0	0	0	0	0	0	0	0	0	0	0	0	0	0
O15173	PGRMC2	3	1	4	0	1	5	2	3	2	1	6	2	3	2	0	73120000	0	56655000	0	0	100780000	0	0	0	0	146830000	72350000	44799000	32155000	0
P84022;Q15796;O15198	SMAD3;SMAD2;SMAD9	1	0	1	0	1	2	0	1	1	1	1	0	0	0	0	0	0	0	0	0	39862000	0	0	0	0	0	0	0	0	0
O15212	PFDN6	1	0	2	0	0	3	0	1	1	0	2	0	0	0	0	0	0	58356000	0	0	60734000	0	0	0	0	0	0	0	0	0
O15213	WDR46	2	0	0	0	0	0	0	7	3	0	0	0	0	0	0	0	0	0	0	0	0	0	44256000	25904000	0	0	0	0	0	0
O15226	NKRF	2	0	1	0	1	2	0	2	4	0	0	0	3	0	0	0	0	0	0	0	0	0	27688000	18478000	0	0	0	0	0	0
O15230	LAMA5	0	15	9	20	8	0	11	25	13	5	0	0	34	8	0	0	188120000	54091000	435450000	75130000	0	106180000	190360000	97654000	81267000	0	0	393190000	47831000	0
O15231	ZNF185	7	2	15	0	0	9	1	5	5	0	3	9	0	0	0	58175000	26115000	161950000	0	0	124760000	0	61674000	76239000	0	35280000	217080000	0	0	0
O15235	MRPS12	1	0	0	0	0	0	0	1	1	0	0	0	3	2	0	0	0	0	0	0	0	0	0	0	0	0	0	43677000	57873000	0
O15264	MAPK13	0	0	0	0	0	0	0	0	0	0	0	1	0	0	0	0	0	0	0	0	0	0	0	0	0	0	10577000	0	0	0
O15269	SPTLC1	2	0	1	0	0	4	0	1	1	0	1	1	2	0	0	35422000	0	0	0	0	36688000	0	0	0	0	45768000	0	0	0	0
O15270	SPTLC2	2	0	2	0	0	3	0	2	2	0	1	1	2	0	0	0	0	0	0	0	0	0	8242300	0	0	0	0	6810800	0	0
O15294	OGT	4	0	5	0	0	6	0	1	0	0	2	0	0	0	0	39793000	0	0	0	0	22557000	0	0	0	0	31339000	0	0	0	0
O15321	TM9SF1	2	0	2	0	0	1	0	0	1	0	0	0	1	0	0	0	0	0	0	0	3119800	0	0	0	0	0	0	0	0	0
O15355	PPM1G	3	0	5	0	0	4	1	4	4	2	1	0	2	0	0	16078000	0	50854000	0	0	55522000	0	59233000	66407000	0	0	0	57109000	0	0
O15357	INPPL1	0	0	2	0	0	1	0	0	1	0	0	0	0	0	0	0	0	0	0	0	0	0	0	0	0	0	0	0	0	0
O15371	EIF3D	10	1	8	0	1	10	1	8	2	1	2	2	4	3	1	136700000	0	138750000	0	0	286300000	0	138110000	115370000	0	92390000	119650000	117290000	68232000	0
O15372	EIF3H	3	0	3	1	1	9	0	8	3	3	2	2	6	2	0	51612000	0	60146000	0	0	196900000	0	159910000	87497000	46483000	54354000	52151000	73631000	46992000	0
O15382	BCAT2	0	0	0	0	0	3	0	1	0	0	1	0	1	0	0	0	0	0	0	0	0	0	0	0	0	0	0	0	0	0
O15391;P25490;Q96MM3	YY2;YY1;ZFP42	0	0	0	0	0	1	0	1	1	0	0	0	0	0	0	0	0	0	0	0	0	0	0	10089000	0	0	0	0	0	0
O15397	IPO8	3	0	1	0	1	3	1	1	1	1	1	0	1	0	0	0	0	0	0	0	8241100	0	0	0	0	0	0	0	0	0
O15400	STX7	1	0	2	0	1	3	0	3	1	0	2	0	2	0	0	39631000	0	63440000	0	0	62477000	0	28710000	0	0	69172000	0	0	0	0
O15438	ABCC3	2	0	1	0	0	5	0	2	2	0	6	0	9	0	0	0	0	0	0	0	41406000	0	22563000	26348000	0	58576000	0	75683000	0	0
O15446	CD3EAP	2	4	3	0	4	1	1	4	2	1	0	0	2	1	0	19514000	55319000	51536000	0	48913000	0	0	45724000	33163000	0	0	0	44535000	0	0
O15460	P4HA2	2	0	2	0	0	1	0	0	0	0	0	0	0	0	0	0	0	16697000	0	0	0	0	0	0	0	0	0	0	0	0
O15498	YKT6	4	0	5	0	0	5	0	5	1	0	2	1	2	0	0	48146000	0	35343000	0	0	43205000	0	38725000	0	0	49407000	0	49729000	0	0
O15511	ARPC5	2	0	1	1	0	1	0	0	0	0	1	2	1	0	0	0	0	0	0	0	72497000	0	0	0	0	0	0	0	0	0
O15533	TAPBP	3	0	4	0	0	1	0	0	0	0	1	0	0	0	0	62977000	0	69025000	0	0	0	0	0	0	0	0	0	0	0	0
O15551;O95484;P56747	CLDN3	2	0	4	0	0	4	1	3	2	1	2	0	2	0	0	96115000	0	106180000	0	0	97887000	0	72684000	66002000	0	127510000	0	92067000	0	0
O15554	KCNN4	0	0	2	0	0	1	0	1	1	0	0	0	2	1	0	0	0	0	0	0	0	0	7422200	6317800	0	0	0	11345000	0	0
O43149	ZZEF1	0	0	1	1	1	0	0	1	0	0	0	1	0	0	0	0	0	0	0	0	0	0	0	0	0	0	0	0	0	0
O43150	ASAP2	1	0	1	0	0	0	0	0	0	0	0	0	0	0	0	0	0	0	0	0	0	0	0	0	0	0	0	0	0	0
O43156	TTI1	0	0	1	0	0	1	0	0	0	0	0	0	0	0	0	0	0	0	0	0	14560000	0	0	0	0	0	0	0	0	0
O43159	RRP8	0	0	0	0	0	0	0	2	0	0	0	0	0	0	0	0	0	0	0	0	0	0	6337100	0	0	0	0	0	0	0
O43166	SIPA1L1	0	0	0	0	0	0	0	0	0	0	0	0	0	0	0	0	0	0	0	0	0	0	0	0	0	0	0	0	0	0
O43169	CYB5B	3	1	3	0	1	5	0	2	2	0	4	1	2	1	0	130570000	0	92071000	0	0	218880000	0	92576000	105970000	0	183330000	0	92118000	0	0
O43172	PRPF4	6	0	7	0	0	7	1	7	5	1	4	0	3	0	0	49884000	0	55501000	0	0	58417000	0	55689000	33861000	0	52463000	0	44669000	0	0
O43175	PHGDH	15	3	16	0	5	14	3	10	10	2	8	11	8	2	1	649420000	75291000	479090000	0	123350000	503990000	63639000	270350000	306540000	35978000	367000000	739340000	202030000	71025000	0
O43181	NDUFS4	2	0	0	0	0	1	0	1	0	0	1	0	1	0	0	0	0	0	0	0	0	0	0	0	0	42729000	0	0	0	0
O43237	DYNC1LI2	6	0	9	0	0	8	0	5	5	0	4	1	5	0	0	137060000	0	89372000	0	0	94631000	0	39584000	51026000	0	84427000	0	56385000	0	0
O43240	KLK10	0	0	0	0	0	0	0	0	1	0	0	3	0	0	0	0	0	0	0	0	0	0	0	0	0	0	71322000	0	0	0
O43242	PSMD3	13	1	7	0	2	14	3	12	10	4	6	7	8	3	2	296070000	0	203340000	0	36858000	330400000	68578000	247150000	225180000	50681000	183260000	161250000	127570000	21943000	0
O43252	PAPSS1	2	0	1	0	0	2	0	0	0	0	1	0	0	0	0	0	0	0	0	0	0	0	0	0	0	0	0	0	0	0
O43264	ZW10	2	0	3	0	0	4	0	3	3	0	1	0	2	0	0	0	0	23496000	0	0	40785000	0	20238000	20918000	0	0	0	19148000	0	0
O43278	SPINT1	0	0	0	0	0	0	0	0	0	0	0	0	0	0	0	0	0	0	0	0	0	0	0	0	0	0	0	0	0	0
O43291	SPINT2	2	0	0	0	0	0	0	0	0	0	0	0	0	0	0	26752000	0	0	0	0	0	0	0	0	0	0	0	0	0	0
O43292	GPAA1	2	0	2	1	1	1	0	1	1	0	1	1	2	1	0	0	0	1152300000	0	0	0	0	0	0	0	0	0	281520000	0	0
O43324	EEF1E1	4	0	3	0	0	7	0	1	0	0	2	0	0	0	0	80412000	0	31600000	0	0	73615000	0	0	0	0	106450000	0	0	0	0
O43353	RIPK2	1	0	0	0	0	0	0	0	0	0	0	0	0	0	0	0	0	0	0	0	0	0	0	0	0	0	0	0	0	0
O43395	PRPF3	5	0	5	0	0	3	1	7	3	3	2	0	4	2	0	25136000	0	35321000	0	0	26900000	0	80247000	33015000	0	0	0	42029000	46604000	0
O43399	TPD52L2	8	2	10	4	2	9	3	7	6	2	6	2	5	3	2	583110000	70867000	377700000	134580000	90112000	856030000	64035000	174090000	179340000	66072000	755310000	0	202120000	40929000	0
O43402	EMC8	0	0	1	0	0	0	0	1	1	0	0	0	0	0	0	0	0	0	0	0	0	0	10097000	0	0	0	0	0	0	0
O43432	EIF4G3	3	0	3	0	0	1	0	0	0	0	0	0	0	0	0	0	0	0	0	0	0	0	0	0	0	0	0	0	0	0
O43447	PPIH	1	0	1	0	0	1	0	1	1	0	0	0	0	0	0	0	0	0	0	0	0	0	8974200	0	0	0	0	0	0	0
O43464	HTRA2	1	0	2	0	0	1	0	3	3	1	0	0	2	0	0	0	0	0	0	0	0	0	15922000	17826000	0	0	0	20707000	0	0
O43488;Q8NHP1;O95154	AKR7A2	2	0	0	0	0	2	0	1	1	0	0	0	1	0	0	27981000	0	0	0	0	11058000	0	0	0	0	0	0	0	0	0
O43491	EPB41L2	5	0	3	0	0	6	0	6	4	1	1	0	1	0	0	14808000	0	20590000	0	0	18511000	0	18127000	14421000	0	0	0	0	0	0
O43548	TGM5	0	5	1	1	6	0	2	0	0	0	0	2	0	2	0	0	84208000	0	0	68219000	0	35105000	0	0	0	0	39552000	0	45013000	0
O43583	DENR	3	0	0	0	0	1	0	2	2	0	0	0	0	0	0	0	0	0	0	0	0	0	17897000	18044000	0	0	0	0	0	0
O43592	XPOT	11	0	6	0	0	8	0	5	6	0	5	0	4	0	0	105730000	0	66316000	0	0	94164000	0	47509000	54728000	0	80535000	0	52230000	0	0
O43617	TRAPPC3	2	0	2	0	0	2	0	0	0	0	2	0	0	0	0	35964000	0	25029000	0	0	31229000	0	0	0	0	35098000	0	0	0	0
O43633	CHMP2A	0	0	2	0	0	0	0	1	0	0	0	1	2	1	0	0	0	26736000	0	0	0	0	0	0	0	0	0	39209000	0	0
O43657	TSPAN6	1	0	1	0	0	0	0	0	0	0	0	0	0	0	0	0	0	0	0	0	0	0	0	0	0	0	0	0	0	0
O43660	PLRG1	5	0	3	0	0	3	0	7	4	3	2	0	5	3	0	32970000	0	39459000	0	0	55066000	0	61370000	60786000	42902000	0	0	61585000	0	0
O43670	ZNF207	3	1	4	1	2	1	0	3	2	2	2	3	3	3	1	33341000	0	44315000	0	49539000	0	0	62721000	48947000	57950000	43046000	28556000	47074000	33352000	0
O43674	NDUFB5	2	0	0	0	0	1	0	0	0	0	0	0	0	0	0	34685000	0	0	0	0	0	0	0	0	0	0	0	0	0	0
O43676	NDUFB3	1	0	1	0	0	2	0	1	1	0	1	0	1	0	0	0	0	0	0	0	38457000	0	0	0	0	0	0	0	0	0
O43678	NDUFA2	0	0	1	0	0	1	0	0	0	0	2	0	0	0	0	0	0	0	0	0	21966000	0	0	0	0	0	0	0	0	0
O43681	ASNA1	7	1	4	0	2	7	2	6	5	2	5	2	3	2	1	172330000	0	186200000	0	95411000	256110000	109210000	166780000	165620000	73769000	115320000	71765000	116620000	61775000	0
O43719	HTATSF1	0	0	0	0	0	2	0	0	0	0	1	0	0	0	0	0	0	0	0	0	0	0	0	0	0	0	0	0	0	0
O43747	AP1G1	3	0	6	0	0	6	0	4	4	0	4	3	4	1	0	57223000	0	45832000	0	0	112540000	0	57921000	53368000	0	144940000	85490000	64549000	0	0
O43752	STX6	1	0	0	0	0	0	0	0	0	0	0	0	0	0	0	0	0	0	0	0	0	0	0	0	0	0	0	0	0	0
O43759	SYNGR1	1	0	1	0	0	2	0	1	0	0	1	0	2	0	0	0	0	0	0	0	17256000	0	0	0	0	0	0	0	0	0
O43760	SYNGR2	4	3	4	2	2	4	2	3	3	1	3	3	1	1	1	108280000	76833000	125560000	131740000	77064000	183480000	87664000	95592000	102750000	0	188860000	118950000	0	0	0
O43765	SGTA	1	0	2	0	0	4	0	0	0	0	0	0	0	0	0	0	0	11596000	0	0	18098000	0	0	0	0	0	0	0	0	0
O43768	ENSA	0	0	0	0	1	1	0	0	0	0	1	1	1	0	0	0	0	0	0	0	0	0	0	0	0	0	10315000	0	0	0
O43772	SLC25A20	1	0	1	0	0	4	0	1	1	1	3	0	1	1	0	0	0	0	0	0	59238000	0	0	0	0	93928000	0	0	0	0
O43776	NARS	12	1	7	2	1	12	3	6	6	1	3	2	6	1	0	280270000	0	165180000	0	0	201130000	70137000	94384000	90976000	0	68176000	0	66172000	0	0
O43795;Q9UBC5	MYO1B	15	0	10	0	1	15	0	7	3	0	3	2	3	0	0	183790000	0	88792000	0	0	147830000	0	64900000	49337000	0	40796000	50007000	42347000	0	0
O43813	LANCL1	5	0	3	1	1	6	0	4	1	0	4	0	2	1	0	68942000	0	48881000	0	0	69727000	0	61015000	0	0	78798000	0	70027000	0	0
O43815	STRN	2	0	0	0	0	0	0	0	0	0	0	0	0	0	0	0	0	0	0	0	0	0	0	0	0	0	0	0	0	0
O43818	RRP9	4	1	5	0	1	5	1	6	4	3	2	0	4	1	0	30593000	0	55504000	0	0	44288000	0	86956000	77088000	41166000	48808000	0	62030000	0	0
O43823	AKAP8	0	0	0	0	0	1	0	1	1	0	0	0	1	0	1	0	0	0	0	0	0	0	15486000	0	0	0	0	0	0	0
O43837	IDH3B	4	0	4	0	0	4	0	3	2	0	4	1	3	1	0	45720000	0	22260000	0	0	66402000	0	34120000	35147000	0	87166000	0	46724000	0	0
O43847	NRD1	1	0	0	0	0	6	0	0	1	0	1	1	0	0	0	0	0	0	0	0	34724000	0	0	0	0	0	0	0	0	0
O43852	CALU	5	0	4	1	2	6	0	3	0	0	4	0	2	0	0	78282000	0	56519000	0	44505000	94028000	0	58584000	0	0	126250000	0	64153000	0	0
O43854	EDIL3	2	0	1	0	0	0	0	0	0	0	0	0	1	0	0	0	0	0	0	0	0	0	0	0	0	0	0	0	0	0
O43865	AHCYL1	8	0	3	0	0	4	0	2	1	0	1	0	1	0	0	52101000	0	93347000	0	0	48595000	0	41407000	48270000	0	56846000	0	0	0	0
O43920	NDUFS5	2	0	0	0	0	3	0	0	1	0	2	0	0	0	0	32129000	0	0	0	0	33062000	0	0	0	0	68010000	0	0	0	0
O60216;Q9H4I0	RAD21	1	0	1	0	0	5	0	3	1	0	1	0	1	0	0	0	0	0	0	0	31430000	0	44244000	0	0	0	0	0	0	0
O60218	AKR1B10	0	0	0	0	0	0	0	0	0	0	0	1	0	0	0	0	0	0	0	0	0	0	0	0	0	0	12142000	0	0	0
O60220	TIMM8A	1	1	1	0	1	1	0	0	0	0	0	0	0	0	0	0	0	0	0	0	0	0	0	0	0	0	0	0	0	0
O60231	DHX16	1	0	3	0	0	6	0	9	5	2	0	0	0	0	0	0	0	0	0	0	44952000	0	66033000	53497000	0	0	0	0	0	0
O60232	SSSCA1	1	0	3	0	0	3	0	1	1	0	1	0	1	0	0	0	0	25722000	0	0	45171000	0	0	0	0	0	0	0	0	0
O60259	KLK8	0	1	0	0	1	0	0	0	0	0	0	0	0	0	0	0	16770000	0	0	0	0	0	0	0	0	0	0	0	0	0
O60264	SMARCA5	8	1	9	0	0	8	5	16	10	3	5	2	7	1	0	90872000	0	88672000	0	0	70566000	136130000	165930000	105650000	73264000	72470000	0	97249000	0	0
O60271;Q9UPT6	SPAG9	23	2	24	0	7	25	6	22	19	5	12	1	14	5	1	550160000	19940000	659390000	0	67495000	825850000	78961000	650630000	640500000	69441000	440590000	0	362980000	65308000	0
O60306	AQR	1	0	2	0	0	5	0	1	0	0	1	0	0	0	0	0	0	0	0	0	48315000	0	0	0	0	0	0	0	0	0
O60313	OPA1	21	0	18	0	2	21	0	11	9	0	14	0	14	2	0	272790000	0	257620000	0	11422000	326390000	0	145700000	128500000	0	412810000	0	195320000	46275000	0
O60341	KDM1A	3	0	2	0	0	7	2	5	5	1	3	1	4	0	0	45216000	0	36023000	0	0	49742000	57648000	61794000	51077000	0	62781000	0	52904000	0	0
O60427	FADS1	0	0	3	0	2	1	0	0	0	0	0	0	1	0	0	0	0	13686000	0	17230000	0	0	0	0	0	0	0	0	0	0
O60437	PPL	3	3	11	3	2	3	7	3	1	0	2	59	8	2	1	11680000	57001000	103360000	12614000	52641000	14306000	73358000	4225100	0	0	0	3794400000	44781000	0	0
O60488	ACSL4	8	0	8	0	2	11	0	5	7	1	4	1	6	1	0	94307000	0	71756000	0	0	66820000	0	47710000	64551000	0	86481000	0	54575000	0	0
O60493	SNX3	2	0	2	0	0	1	0	0	0	0	1	0	0	0	0	0	0	0	0	0	0	0	0	0	0	0	0	0	0	0
O60499	STX10	1	0	1	0	0	1	0	0	0	0	1	0	0	0	0	0	0	5607300	0	0	0	0	0	0	0	0	0	0	0	0
O60502	MGEA5	2	0	1	0	0	1	0	0	0	0	0	0	0	0	0	0	0	0	0	0	12325000	0	0	0	0	0	0	0	0	0
O60518	RANBP6	2	0	1	0	1	2	1	2	1	1	2	0	1	1	0	0	0	0	0	0	0	0	0	0	0	0	0	0	0	0
O60524	NEMF	1	0	1	0	0	0	0	3	1	0	0	0	0	0	0	0	0	0	0	0	0	0	0	0	0	0	0	0	0	0
O60547	GMDS	0	0	1	0	0	0	0	0	0	0	0	0	0	0	0	0	0	0	0	0	0	0	0	0	0	0	0	0	0	0
O60568	PLOD3	4	0	3	0	0	5	0	4	2	0	2	0	1	0	0	39979000	0	34951000	0	0	38215000	0	25676000	24536000	0	35547000	0	0	0	0
O60573	EIF4E2	2	0	1	0	0	3	0	0	0	0	0	0	0	0	0	0	0	0	0	0	40930000	0	0	0	0	0	0	0	0	0
O60610	DIAPH1	5	0	8	0	0	8	0	4	1	0	2	0	1	0	0	47617000	0	57912000	0	0	61564000	0	24911000	0	0	28779000	0	0	0	0
O60637	TSPAN3	2	0	2	0	1	1	0	0	0	0	0	0	1	0	0	27032000	0	39495000	0	0	0	0	0	0	0	0	0	0	0	0
O60645	EXOC3	3	0	0	0	0	1	0	0	0	0	1	0	0	0	0	12603000	0	0	0	0	0	0	0	0	0	0	0	0	0	0
O60664	PLIN3	9	1	9	0	2	12	3	10	5	1	8	3	6	2	0	309310000	0	291360000	0	57072000	347450000	64914000	197080000	146230000	0	243790000	72941000	132520000	35248000	0
O60684;O15131	KPNA6	6	0	3	0	0	7	1	3	3	0	3	1	2	0	0	71336000	0	41935000	0	0	85702000	0	48217000	38553000	0	53639000	0	28307000	0	0
O60701	UGDH	7	3	6	1	1	9	0	4	3	0	1	1	1	0	0	75574000	40721000	67608000	0	0	68163000	0	42934000	51545000	0	0	0	0	0	0
O60716	CTNND1	17	0	16	1	2	18	1	9	10	1	10	3	10	2	0	350850000	0	238620000	0	34032000	228590000	0	134640000	167410000	0	236860000	44932000	167010000	22429000	0
O60725	ICMT	2	0	0	0	0	0	0	3	2	1	0	0	1	1	0	40456000	0	0	0	0	0	0	35764000	32877000	0	0	0	0	0	0
O60749	SNX2	5	0	7	0	0	7	0	0	0	0	6	0	1	0	0	71566000	0	47252000	0	0	76386000	0	0	0	0	102980000	0	0	0	0
O60762	DPM1	5	0	5	0	1	2	0	0	1	0	2	0	3	0	0	0	0	24575000	0	0	0	0	0	0	0	0	0	27015000	0	0
O60763	USO1	5	0	6	0	0	8	0	1	1	0	2	3	0	0	0	32294000	0	29762000	0	0	36393000	0	0	0	0	22117000	43781000	0	0	0
O60783	MRPS14	0	0	0	0	0	1	0	0	0	0	2	0	1	0	0	0	0	0	0	0	0	0	0	0	0	20754000	0	0	0	0
O60825	PFKFB2	1	0	1	0	0	1	0	1	1	0	0	0	0	0	0	0	0	0	0	0	0	0	9169200	0	0	0	0	0	0	0
O60826	CCDC22	2	0	2	0	0	0	0	0	0	0	1	0	0	0	0	0	0	10587000	0	0	0	0	0	0	0	0	0	0	0	0
O60828	PQBP1	1	0	2	0	0	2	1	3	2	2	1	0	2	2	1	0	0	25293000	0	0	30551000	0	53672000	33136000	41731000	0	0	33080000	36530000	0
O60830	TIMM17B	1	0	0	0	0	0	0	0	0	0	0	0	0	0	0	0	0	0	0	0	0	0	0	0	0	0	0	0	0	0
O60832	DKC1	9	1	12	0	4	7	0	9	5	1	2	2	7	1	1	226090000	0	251050000	0	85731000	110770000	0	128950000	49361000	0	59122000	42586000	103470000	0	0
O60869	EDF1	1	1	2	0	0	2	0	2	1	2	1	1	2	1	1	0	0	37926000	0	0	54127000	0	50452000	0	44633000	0	0	47845000	0	0
O60879	DIAPH2	0	0	0	1	0	0	0	0	0	1	0	0	0	0	0	0	0	0	0	0	0	0	0	0	0	0	0	0	0	0
O60884	DNAJA2	2	0	4	0	1	7	1	4	3	0	2	1	2	0	0	37964000	0	53729000	0	0	132690000	0	60168000	56163000	0	45335000	0	41910000	0	0
O60885;Q58F21	BRD4	3	0	5	0	0	2	0	2	0	0	0	0	0	0	0	21115000	0	17447000	0	0	20124000	0	0	0	0	0	0	0	0	0
O60888	CUTA	0	0	0	0	0	2	0	0	0	0	0	0	0	0	0	0	0	0	0	0	25540000	0	0	0	0	0	0	0	0	0
O60911	CTSV	0	2	4	3	2	0	0	1	3	0	0	6	0	2	0	0	0	37021000	41318000	37758000	0	0	0	29151000	0	0	97793000	0	39745000	0
O60925	PFDN1	1	0	1	0	0	3	0	1	1	0	1	1	1	0	0	0	0	0	0	0	82803000	0	0	0	0	0	0	0	0	0
O60934	NBN	0	0	0	0	0	0	0	1	0	0	0	0	0	0	0	0	0	0	0	0	0	0	0	0	0	0	0	0	0	0
O60936	NOL3	1	0	0	0	0	2	0	0	0	0	0	0	0	0	0	0	0	0	0	0	14313000	0	0	0	0	0	0	0	0	0
O75027	ABCB7	1	0	3	0	0	3	0	1	1	1	1	0	2	0	0	0	0	15058000	0	0	0	0	0	0	0	0	0	0	0	0
O75110	ATP9A	1	0	2	0	0	1	0	1	0	0	2	0	3	2	0	0	0	0	0	0	0	0	0	0	0	0	0	0	0	0
O75116	ROCK2	12	0	10	0	0	10	0	6	3	0	4	0	2	0	0	120190000	0	72740000	0	0	130200000	0	47263000	30117000	0	34369000	0	0	0	0
O75122	CLASP2	1	0	0	0	0	5	0	0	0	0	1	0	0	0	0	0	0	0	0	0	39404000	0	0	0	0	0	0	0	0	0
O75146	HIP1R	0	0	1	0	0	0	0	0	0	0	0	3	0	0	0	0	0	0	0	0	0	0	0	0	0	0	55221000	0	0	0
O75152	ZC3H11A	0	0	0	1	0	0	0	5	5	3	0	0	4	6	0	0	0	0	0	0	0	0	40218000	53226000	46838000	0	0	35452000	119510000	0
O75153	CLUH	0	0	1	0	0	9	0	5	3	0	3	0	1	0	0	0	0	0	0	0	59243000	0	48455000	22322000	0	24324000	0	0	0	0
O75155	CAND2	1	0	2	0	0	0	0	1	1	0	0	0	0	0	0	0	0	0	0	0	0	0	0	0	0	0	0	0	0	0
O75165	DNAJC13	2	0	1	0	0	7	0	0	2	0	3	0	0	0	0	0	0	0	0	0	16393000	0	0	0	0	23156000	0	0	0	0
O75175	CNOT3	1	0	0	0	0	1	0	1	0	0	1	0	0	0	0	0	0	0	0	0	23250000	0	0	0	0	0	0	0	0	0
O75179;Q8IWZ3	ANKRD17;ANKHD1	1	0	2	0	0	8	0	2	3	0	1	0	2	0	0	0	0	20538000	0	0	0	0	0	0	0	0	0	0	0	0
O75190;Q8NHS0	DNAJB6;DNAJB8	0	0	0	0	0	0	0	0	0	0	0	1	0	0	0	0	0	0	0	0	0	0	0	0	0	0	0	0	0	0
O75208	COQ9	0	0	1	0	0	0	0	0	0	0	0	0	0	0	0	0	0	0	0	0	0	0	0	0	0	0	0	0	0	0
O75251	NDUFS7	0	0	1	0	0	1	0	1	1	0	1	0	1	0	0	0	0	0	0	0	0	0	19321000	0	0	0	0	0	0	0
O75306	NDUFS2	1	1	6	0	0	7	0	5	5	0	4	0	4	0	0	0	0	83570000	0	0	80597000	0	58830000	83525000	0	124570000	0	108200000	0	0
O75323	GBAS	6	0	3	1	1	3	0	1	1	0	3	0	3	1	0	112810000	0	143290000	0	0	127770000	0	0	0	0	227290000	0	145000000	0	0
O75330	HMMR	0	0	0	0	1	0	0	0	0	0	0	0	0	0	0	0	0	0	0	0	0	0	0	0	0	0	0	0	0	0
O75340	PDCD6	6	1	6	1	1	5	1	3	1	1	2	2	2	3	1	272050000	0	126580000	0	0	209340000	0	56818000	0	0	233180000	120840000	54081000	93135000	0
O75347	TBCA	2	0	2	0	0	2	0	0	1	0	2	2	2	0	0	24451000	0	0	0	0	41742000	0	0	0	0	42093000	0	0	0	0
O75348	ATP6V1G1	1	0	1	0	0	3	0	0	0	0	1	0	0	0	0	0	0	0	0	0	36488000	0	0	0	0	0	0	0	0	0
O75351;Q6PIW4	VPS4B	2	0	3	0	0	4	0	4	3	0	2	2	2	0	0	38061000	0	27305000	0	0	42896000	0	28224000	29322000	0	33552000	0	27675000	0	0
O75352	MPDU1	1	0	1	0	0	2	0	1	1	0	0	0	1	0	0	0	0	0	0	0	29236000	0	0	0	0	0	0	0	0	0
O75368	SH3BGRL	0	0	0	0	0	0	0	0	0	0	0	1	0	0	0	0	0	0	0	0	0	0	0	0	0	0	0	0	0	0
O75381	PEX14	1	0	2	0	0	2	0	0	0	0	2	0	0	0	0	0	0	0	0	0	15131000	0	0	0	0	28488000	0	0	0	0
O75382	TRIM3	0	0	0	0	0	0	0	0	0	0	0	0	0	0	0	0	0	0	0	0	0	0	0	0	0	0	0	0	0	0
O75396	SEC22B	6	3	9	1	3	5	2	6	4	2	5	3	6	3	2	151600000	45922000	237120000	0	50495000	130950000	67136000	97027000	130380000	51969000	154180000	74773000	117030000	117130000	0
O75410;O95359	TACC1	3	0	6	0	0	2	0	2	1	0	1	0	0	0	0	24768000	0	32345000	0	0	41325000	0	0	0	0	0	0	0	0	0
O75431	MTX2	3	0	0	0	0	6	0	1	2	0	2	0	3	0	0	47076000	0	0	0	0	84078000	0	0	42302000	0	44655000	0	47597000	0	0
O75436	VPS26A	4	2	7	1	2	7	2	4	3	0	3	2	2	1	0	60186000	39694000	75661000	0	33328000	47681000	35429000	51022000	46320000	0	41041000	40129000	56702000	0	0
O75438	NDUFB1	1	0	0	0	0	1	0	1	0	0	1	0	1	0	0	0	0	0	0	0	0	0	0	0	0	0	0	0	0	0
O75439	PMPCB	6	1	6	0	0	9	2	8	1	0	6	1	9	1	0	62288000	0	40996000	0	0	75967000	0	61621000	0	0	106090000	0	84321000	0	0
O75448	MED24	1	0	0	0	0	1	0	1	1	0	0	0	1	0	0	0	0	0	0	0	0	0	0	0	0	0	0	4737700	0	0
O75477	ERLIN1	1	0	3	1	0	2	0	1	1	0	1	0	0	0	0	0	0	0	0	0	0	0	0	0	0	0	0	0	0	0
O75489	NDUFS3	4	0	1	0	0	9	0	5	4	0	2	2	2	0	0	46115000	0	39268000	0	0	162690000	0	41734000	48154000	0	134410000	45569000	25006000	0	0
O75509	TNFRSF21	3	0	1	0	0	0	0	0	0	0	0	0	0	0	0	31736000	0	0	0	0	0	0	0	0	0	0	0	0	0	0
O75521	ECI2	15	1	15	1	4	13	1	10	7	1	9	0	10	4	1	664490000	0	441230000	0	99624000	550560000	0	224520000	262920000	0	540870000	0	372480000	85453000	0
O75525	KHDRBS3	1	0	4	1	6	0	0	0	1	3	1	0	3	0	2	0	0	32981000	0	86619000	0	0	0	0	0	0	0	40344000	0	0
O75531	BANF1	1	0	2	0	0	2	1	1	2	1	0	1	1	1	1	0	0	0	0	0	85294000	0	0	61736000	0	0	0	0	0	0
O75534	CSDE1	6	0	9	0	1	12	2	11	5	5	4	1	5	1	0	84754000	0	82805000	0	0	146680000	0	131520000	73435000	50982000	121270000	0	93162000	0	0
O75569	PRKRA	3	0	5	0	0	2	0	1	1	0	2	0	1	1	0	36570000	0	28868000	0	0	37751000	0	0	0	0	27310000	0	0	0	0
O75607	NPM3	0	0	0	0	0	0	0	1	0	0	1	0	0	0	0	0	0	0	0	0	0	0	0	0	0	0	0	0	0	0
O75608	LYPLA1	0	2	2	1	2	0	0	0	1	0	0	2	1	2	0	0	46897000	17337000	0	41448000	0	0	0	0	0	0	53928000	0	49731000	0
O75629	CREG1	0	0	0	0	1	0	1	0	0	1	0	2	1	1	1	0	0	0	0	0	0	0	0	0	0	0	72409000	0	0	0
O75635	SERPINB7	0	4	1	0	3	0	2	1	1	1	0	2	1	0	0	0	67565000	0	0	52650000	0	0	0	0	0	0	0	0	0	0
O75663	TIPRL	1	0	1	0	0	0	0	0	0	1	0	0	1	0	0	0	0	0	0	0	0	0	0	0	25796000	0	0	0	0	0
O75691	UTP20	0	0	0	0	0	0	0	5	0	0	0	0	0	0	0	0	0	0	0	0	0	0	25157000	0	0	0	0	0	0	0
O75694	NUP155	12	0	14	0	0	16	1	14	8	1	6	0	10	0	0	179390000	0	165180000	0	0	196340000	0	150110000	92185000	0	143610000	0	102960000	0	0
O75695	RP2	2	0	2	0	0	5	0	2	2	0	1	0	1	0	0	0	0	17596000	0	0	0	0	17585000	18529000	0	0	0	0	0	0
O75717	WDHD1	4	0	2	0	0	4	0	13	3	0	0	0	0	0	0	23013000	0	16182000	0	0	41762000	0	172310000	22889000	0	0	0	0	0	0
O75718	CRTAP	3	0	3	0	0	5	0	0	1	0	4	0	1	0	0	48313000	0	40040000	0	0	60800000	0	0	0	0	75194000	0	0	0	0
O75746	SLC25A12	9	0	8	0	0	11	1	2	5	1	6	3	6	1	0	33575000	0	32827000	0	0	36644000	0	0	0	0	0	0	26005000	0	0
O75752	B3GALNT1	0	0	0	0	0	1	0	0	0	0	0	0	0	0	0	0	0	0	0	0	34214000	0	0	0	0	0	0	0	0	0
O75781	PALM	2	0	2	0	0	0	0	1	0	0	0	0	0	0	0	19031000	0	14317000	0	0	0	0	0	0	0	0	0	0	0	0
O75787	ATP6AP2	1	0	2	0	0	3	0	0	0	0	1	0	0	0	0	55887000	0	0	0	0	47886000	0	0	0	0	0	0	0	0	0
O75815	BCAR3	0	0	1	0	0	0	0	0	0	0	0	0	0	0	0	0	0	0	0	0	0	0	0	0	0	0	0	0	0	0
O75821	EIF3G	9	1	5	0	1	11	3	7	6	4	6	4	7	2	1	318010000	0	130030000	0	0	210560000	129730000	285400000	227120000	128530000	164600000	120500000	219820000	74852000	0
O75822	EIF3J	4	0	6	0	0	5	0	4	3	0	3	0	0	0	0	49290000	0	37363000	0	0	76959000	0	39646000	35911000	0	65133000	0	0	0	0
O75828	CBR3	6	2	6	0	2	4	2	4	2	1	3	3	2	2	1	123520000	0	87074000	0	0	95362000	0	56768000	0	0	0	0	0	0	0
O75832	PSMD10	4	0	1	0	0	5	1	4	2	1	2	1	3	1	0	65848000	0	0	0	0	110230000	0	54777000	74537000	0	69142000	0	43249000	0	0
O75844	ZMPSTE24	4	0	7	0	0	7	1	8	6	2	4	1	6	1	1	98093000	0	78618000	0	0	115040000	0	138550000	112760000	66326000	156070000	0	111080000	0	0
O75874	IDH1	9	1	11	2	3	7	2	2	4	2	4	4	2	1	0	89971000	0	126670000	0	18648000	45023000	0	0	33130000	0	40759000	74708000	0	0	0
O75880	SCO1	2	0	0	0	0	0	0	0	0	0	0	0	0	0	0	30266000	0	0	0	0	0	0	0	0	0	0	0	0	0	0
O75882	ATRN	0	0	0	0	0	0	0	0	0	0	0	0	0	0	0	0	0	0	0	0	0	0	0	0	0	0	0	0	0	0
O75884	RBBP9	0	0	0	0	0	1	0	1	0	0	0	0	0	0	0	0	0	0	0	0	0	0	0	0	0	0	0	0	0	0
O75886	STAM2	2	0	3	0	0	1	0	1	0	0	0	0	0	0	0	22606000	0	28481000	0	0	0	0	0	0	0	0	0	0	0	0
O75907	DGAT1	1	3	3	1	3	1	2	4	4	2	0	0	1	2	0	0	72829000	45059000	0	68434000	0	0	42062000	50588000	66802000	0	0	0	0	0
O75909	CCNK	0	0	1	0	0	1	0	3	1	1	1	0	1	0	0	0	0	0	0	0	0	0	34031000	0	0	0	0	0	0	0
O75915	ARL6IP5	3	1	3	2	2	4	0	3	4	0	2	1	4	2	1	172090000	0	131540000	75614000	74460000	71349000	0	87612000	74355000	0	167960000	0	97523000	60363000	0
O75934	BCAS2	0	0	2	0	0	2	0	1	1	0	1	0	0	0	0	0	0	22087000	0	0	34990000	0	0	0	0	0	0	0	0	0
O75935	DCTN3	3	0	3	0	0	3	0	1	0	0	0	0	0	0	0	29898000	0	29123000	0	0	35138000	0	0	0	0	0	0	0	0	0
O75937	DNAJC8	3	1	3	0	3	4	2	4	1	3	3	0	2	0	1	47328000	0	91196000	0	62332000	67636000	72633000	72138000	0	110930000	54371000	0	46910000	0	0
O75940	SMNDC1	1	0	0	0	0	0	0	2	1	0	1	0	1	0	0	0	0	0	0	0	0	0	18795000	0	0	0	0	0	0	0
O75947	ATP5H	9	0	6	1	1	8	1	4	2	0	4	4	4	1	1	357040000	0	156040000	0	0	495280000	0	93796000	66878000	0	248230000	123900000	108610000	0	0
O75955	FLOT1	11	0	8	0	1	5	0	5	7	1	6	0	5	0	0	115460000	0	82686000	0	0	86446000	0	62619000	54578000	0	71904000	0	71124000	0	0
O75964	ATP5L	3	1	4	2	2	4	1	2	4	0	3	2	4	2	1	136120000	0	89019000	59914000	42798000	197980000	0	69677000	84706000	0	252130000	107400000	179810000	114360000	0
O75976	CPD	0	0	1	0	0	2	0	0	0	0	0	0	0	0	0	0	0	0	0	0	9713800	0	0	0	0	0	0	0	0	0
O76003	GLRX3	5	0	7	0	0	6	0	4	5	0	1	1	1	0	0	63480000	0	45424000	0	0	96691000	0	42907000	30199000	0	0	0	0	0	0
O76021	RSL1D1	11	0	11	2	1	8	5	20	8	7	3	0	8	2	0	294740000	0	181360000	59869000	0	144350000	179130000	542380000	230390000	190900000	57914000	0	182710000	80032000	0
O76024	WFS1	2	0	4	0	0	1	0	2	1	0	1	0	3	0	0	0	0	23164000	0	0	0	0	0	0	0	0	0	0	0	0
O76031	CLPX	2	0	1	0	0	5	0	5	4	0	2	0	4	1	0	21910000	0	0	0	0	39255000	0	36764000	26290000	0	38227000	0	39360000	0	0
O76062	TM7SF2	0	0	0	1	0	1	1	2	1	1	0	2	2	2	1	0	0	0	0	0	0	0	22459000	0	0	0	31064000	27706000	21598000	0
O76071	CIAO1	0	0	2	0	0	2	0	2	0	0	0	0	0	0	0	0	0	17159000	0	0	0	0	0	0	0	0	0	0	0	0
O94766	B3GAT3	2	0	0	0	0	1	0	0	0	0	0	1	1	0	0	5475300	0	0	0	0	0	0	0	0	0	0	0	0	0	0
O94776;Q9BTC8	MTA2	6	0	4	0	0	6	0	8	6	0	1	0	5	0	0	46156000	0	45741000	0	0	71366000	0	76320000	61866000	0	0	0	65140000	0	0
O94804	STK10	0	0	0	0	0	0	0	0	0	0	0	0	0	0	0	0	0	0	0	0	0	0	0	0	0	0	0	0	0	0
O94822	LTN1	0	0	0	0	0	2	0	2	0	0	0	0	0	0	0	0	0	0	0	0	3289000	0	0	0	0	0	0	0	0	0
O94826	TOMM70A	13	3	13	0	4	11	1	8	6	0	8	0	8	3	1	392430000	64514000	422180000	0	132040000	536880000	0	209490000	284870000	0	339060000	0	351090000	224450000	0
O94829	IPO13	0	0	0	0	0	0	0	0	0	0	0	0	0	0	0	0	0	0	0	0	0	0	0	0	0	0	0	0	0	0
O94874	UFL1	2	0	4	0	0	7	0	2	2	0	1	0	2	0	0	15797000	0	0	0	0	37518000	0	14680000	17757000	0	0	0	11361000	0	0
O94886	TMEM63A	2	0	1	0	1	0	0	0	0	0	0	0	0	0	0	0	0	359320000	0	0	0	0	0	0	0	0	0	0	0	0
O94901	SUN1	3	0	3	0	0	1	0	7	2	0	1	1	1	0	0	0	0	27163000	0	0	0	0	37968000	25100000	0	0	0	0	0	0
O94905	ERLIN2	2	0	3	1	0	3	0	2	2	0	2	0	1	0	0	40820000	0	43449000	0	0	30119000	0	0	0	0	0	0	0	0	0
O94919	ENDOD1	3	1	4	0	0	1	0	0	0	0	0	0	0	0	0	0	0	46005000	0	0	0	0	0	0	0	0	0	0	0	0
O94925	GLS	6	1	6	0	3	6	4	5	4	4	2	2	6	3	1	95663000	0	85990000	0	52140000	126160000	88161000	118350000	102550000	70659000	119760000	40433000	124890000	74354000	0
O94929	ABLIM3	1	0	0	0	0	1	0	1	0	0	0	0	1	0	0	0	0	0	0	0	0	0	0	0	0	0	0	0	0	0
O94966	USP19	0	0	1	0	0	1	0	1	1	0	0	0	1	0	0	0	0	0	0	0	0	0	0	0	0	0	0	0	0	0
O94973	AP2A2	13	1	10	0	1	14	1	9	7	1	3	2	5	2	0	71089000	0	55632000	0	0	87951000	0	32516000	0	0	0	0	0	0	0
O94979	SEC31A	8	3	14	0	2	10	2	16	9	3	8	4	12	4	0	215910000	81079000	329220000	0	43893000	202500000	0	255940000	188080000	70977000	282690000	103160000	270820000	107980000	0
O94992	HEXIM1	2	0	1	0	0	2	0	2	1	0	2	0	1	0	0	32388000	0	0	0	0	33533000	0	36854000	0	0	39606000	0	0	0	0
O95070	YIF1A	0	0	1	1	1	2	1	2	2	1	0	1	1	1	0	0	0	0	0	0	0	0	22492000	23909000	0	0	0	0	0	0
O95071	UBR5	0	0	0	0	0	4	0	2	0	0	0	0	0	0	0	0	0	0	0	0	21011000	0	0	0	0	0	0	0	0	0
O95104	SCAF4	0	0	3	0	1	0	0	0	1	1	0	0	2	0	0	0	0	20317000	0	0	0	0	0	0	0	0	0	0	0	0
O95159	ZFPL1	5	0	1	0	0	2	0	0	0	0	0	0	0	0	0	92914000	0	0	0	0	0	0	0	0	0	0	0	0	0	0
O95166;Q9H0R8	GABARAP;GABARAPL1	1	0	0	0	0	2	0	0	0	0	0	0	0	0	0	0	0	0	0	0	14487000	0	0	0	0	0	0	0	0	0
O95168	NDUFB4	4	0	3	0	0	4	1	3	2	0	3	1	1	0	0	39348000	0	30102000	0	0	72765000	0	54688000	84575000	0	132850000	0	0	0	0
O95169	NDUFB8	0	0	0	0	0	0	0	0	0	0	1	0	0	0	0	0	0	0	0	0	0	0	0	0	0	18405000	0	0	0	0
O95171	SCEL	0	0	0	0	0	0	0	0	0	0	0	3	0	0	0	0	0	0	0	0	0	0	0	0	0	0	47381000	0	0	0
O95182	NDUFA7	0	0	0	0	0	1	0	0	0	0	1	0	1	0	0	0	0	0	0	0	0	0	0	0	0	72071000	0	0	0	0
O95197	RTN3	2	0	1	1	1	1	1	1	1	1	1	1	1	1	1	126460000	0	200320000	0	0	373620000	0	199750000	228130000	0	551450000	157440000	206400000	0	0
O95202	LETM1	10	0	9	0	1	11	1	7	5	0	6	1	7	0	0	118630000	0	115900000	0	0	179710000	0	94573000	85024000	0	159830000	0	110650000	0	0
O95218	ZRANB2	2	0	2	0	1	2	0	2	1	0	0	0	1	0	0	28896000	0	21234000	0	0	23401000	0	30335000	0	0	0	0	0	0	0
O95219	SNX4	0	0	0	0	0	2	0	0	0	0	0	0	0	0	0	0	0	0	0	0	6700400	0	0	0	0	0	0	0	0	0
O95274	LYPD3	0	0	1	0	1	0	0	0	1	0	0	0	0	0	0	0	0	3793600	0	0	0	0	0	0	0	0	0	0	0	0
O95292	VAPB	6	1	9	0	3	4	1	5	4	3	4	3	5	3	2	150380000	0	176560000	0	114730000	117960000	0	81977000	88531000	0	198180000	62020000	99470000	89206000	0
O95295	SNAPIN	0	0	0	0	0	0	0	0	0	0	0	0	0	0	0	0	0	0	0	0	0	0	0	0	0	0	0	0	0	0
O95297	MPZL1	0	0	0	0	0	0	0	1	0	0	1	0	0	0	0	0	0	0	0	0	0	0	0	0	0	0	0	0	0	0
O95298;E9PQ53	NDUFC2;NDUFC2-KCTD14	0	0	1	0	0	1	0	1	0	0	0	0	1	0	0	0	0	0	0	0	0	0	14788000	0	0	0	0	0	0	0
O95299	NDUFA10	2	0	2	0	0	6	0	3	3	1	3	1	2	1	1	82836000	0	30401000	0	0	114050000	0	48562000	48751000	0	101840000	0	0	0	0
O95302;Q75LS8	FKBP9	0	0	1	0	0	3	0	1	1	0	1	0	2	0	0	0	0	0	0	0	30295000	0	0	0	0	0	0	21156000	0	0
O95336	PGLS	6	0	3	0	0	5	0	2	2	1	2	5	2	0	1	81477000	0	45944000	0	0	49390000	0	35749000	32127000	0	31977000	73134000	21318000	0	0
O95340	PAPSS2	3	0	3	0	0	11	2	7	2	1	3	0	1	0	0	37479000	0	42149000	0	0	104440000	0	25846000	0	0	43112000	0	0	0	0
O95347	SMC2	0	0	0	0	0	3	0	6	3	0	0	0	0	0	0	0	0	0	0	0	28612000	0	22746000	0	0	0	0	0	0	0
O95352	ATG7	2	0	1	0	0	2	0	0	0	0	1	0	0	0	0	0	0	0	0	0	15294000	0	0	0	0	0	0	0	0	0
O95361;Q309B1	TRIM16;TRIM16L	0	0	0	0	0	0	0	0	0	0	0	2	0	0	0	0	0	0	0	0	0	0	0	0	0	0	24399000	0	0	0
O95372	LYPLA2	2	0	2	0	0	2	0	1	0	0	0	0	0	0	0	209620000	0	0	0	0	0	0	0	0	0	0	0	0	0	0
O95373	IPO7	17	0	11	0	4	17	3	12	10	3	9	2	10	2	1	732390000	0	406280000	0	63415000	869460000	68958000	353500000	360270000	78468000	343310000	20275000	198410000	51817000	0
O95376	ARIH2	0	0	1	0	0	1	0	0	0	0	0	0	0	0	0	0	0	0	0	0	0	0	0	0	0	0	0	0	0	0
O95394	PGM3	1	0	1	0	0	1	0	1	1	0	1	0	0	0	0	0	0	0	0	0	0	0	0	0	0	25564000	0	0	0	0
O95399	UTS2	1	1	1	1	1	1	1	1	1	1	1	1	1	1	1	0	0	0	0	0	0	0	0	0	0	0	513810000	0	0	0
O95433	AHSA1	4	0	2	0	0	4	1	4	2	1	0	2	2	1	1	131410000	0	62890000	0	0	68861000	0	59582000	507720000	0	0	42600000	36885000	0	0
O95456	PSMG1	1	0	0	0	0	2	0	0	0	0	0	0	0	0	0	0	0	0	0	0	23697000	0	0	0	0	0	0	0	0	0
O95470	SGPL1	6	2	5	1	2	8	4	7	5	1	5	2	5	3	1	80174000	45707000	67461000	0	53514000	106630000	62714000	67507000	73910000	0	85188000	74384000	79184000	87487000	0
O95487	SEC24B	1	0	1	0	0	2	0	0	0	0	1	0	0	0	0	0	0	0	0	0	14746000	0	0	0	0	0	0	0	0	0
O95571	ETHE1	1	0	3	0	0	2	0	0	0	0	1	0	0	0	0	0	0	18134000	0	0	0	0	0	0	0	0	0	0	0	0
O95602	POLR1A	0	3	12	0	3	1	1	9	5	0	0	0	9	1	0	0	0	84853000	0	39539000	0	0	84133000	42974000	0	0	0	72506000	0	0
O95674	CDS2	1	0	1	0	0	2	0	3	2	0	1	0	2	0	0	0	0	0	0	0	0	0	0	0	0	0	0	18074000	0	0
O95714	HERC2	0	0	1	0	0	2	0	0	0	0	0	0	0	0	0	0	0	0	0	0	3857200	0	0	0	0	0	0	0	0	0
O95716	RAB3D	1	2	2	1	3	3	1	4	3	1	1	1	2	0	0	0	0	0	0	88050000	98857000	0	124320000	109790000	0	0	0	0	0	0
O95721	SNAP29	0	0	3	0	0	2	0	1	1	0	0	0	0	0	0	0	0	24383000	0	0	0	0	0	0	0	0	0	0	0	0
O95747	OXSR1	2	0	3	0	0	2	0	2	1	0	0	1	0	0	0	0	0	0	0	0	0	0	25346000	0	0	0	0	0	0	0
O95757	HSPA4L	4	0	4	0	0	4	0	2	1	0	1	2	1	0	0	0	0	0	0	0	0	0	0	0	0	0	0	0	0	0
O95758	PTBP3	4	1	3	0	1	2	0	5	3	1	1	2	2	1	1	0	0	0	0	0	21115000	0	0	0	0	0	0	0	0	0
O95782	AP2A1	28	1	26	1	5	25	7	28	24	4	15	6	19	5	1	846980000	0	732620000	0	139120000	842150000	112180000	527690000	644400000	96800000	547810000	80556000	448480000	109660000	0
O95786	DDX58	11	0	11	0	0	0	0	0	0	0	0	0	0	0	0	68308000	0	82196000	0	0	0	0	0	0	0	0	0	0	0	0
O95816	BAG2	2	0	1	0	0	2	0	0	0	0	0	0	0	0	0	46375000	0	0	0	0	0	0	0	0	0	0	0	0	0	0
O95817	BAG3	8	0	11	0	1	14	0	10	11	0	9	1	6	0	0	140610000	0	192780000	0	0	236220000	0	165830000	172060000	0	193300000	0	112010000	0	0
O95819;Q8N4C8;Q9UKE5	MAP4K4;MINK1;TNIK	3	0	1	0	0	3	0	3	3	0	2	0	1	0	0	16552000	0	0	0	0	14760000	0	18816000	20702000	0	25943000	0	0	0	0
O95825	CRYZL1	0	0	1	0	0	0	0	0	0	0	0	0	0	0	0	0	0	3856100	0	0	0	0	0	0	0	0	0	0	0	0
O95832	CLDN1	0	0	0	0	0	0	0	0	0	0	0	1	0	0	0	0	0	0	0	0	0	0	0	0	0	0	14283000	0	0	0
O95833	CLIC3	0	0	0	0	0	0	0	0	0	0	0	3	0	0	0	0	0	0	0	0	0	0	0	0	0	0	133780000	0	0	0
O95834	EML2	1	0	0	0	0	0	0	0	0	0	0	1	0	0	0	0	0	0	0	0	0	0	0	0	0	0	9503500	0	0	0
O95857	TSPAN13	1	0	0	0	0	0	0	0	0	0	1	0	0	0	0	0	0	0	0	0	0	0	0	0	0	10757000	0	0	0	0
O95861	BPNT1	8	1	4	0	2	4	0	3	2	0	4	0	2	0	0	62104000	0	44773000	0	22631000	42860000	0	38960000	33375000	0	72352000	0	35920000	0	0
O95865	DDAH2	1	2	4	0	2	1	0	1	0	0	0	0	0	0	0	0	26334000	17415000	0	17634000	0	0	0	0	0	0	0	0	0	0
O95867	LY6G6C	0	3	2	0	2	0	0	0	0	0	0	1	0	0	0	0	41654000	18009000	0	0	0	0	0	0	0	0	0	0	0	0
O95870	ABHD16A	0	0	0	0	0	0	0	0	0	0	0	0	0	0	0	0	0	0	0	0	0	0	0	0	0	0	0	0	0	0
O95881	TXNDC12	1	0	0	0	0	2	0	0	0	0	2	0	0	0	0	0	0	0	0	0	23455000	0	0	0	0	26415000	0	0	0	0
O95905	ECD	0	0	0	0	0	2	0	0	0	0	0	0	0	0	0	0	0	0	0	0	7818500	0	0	0	0	0	0	0	0	0
O95968	SCGB1D1	0	2	1	0	1	0	0	0	0	0	0	0	0	0	0	0	37575000	0	0	0	0	0	0	0	0	0	0	0	0	0
O95969	SCGB1D2	0	1	0	0	1	0	1	1	1	2	0	1	1	1	1	0	0	0	0	0	0	0	0	0	0	0	43183000	0	0	0
O95983	MBD3	1	0	0	0	0	0	0	1	0	0	0	0	1	0	0	0	0	0	0	0	0	0	0	0	0	0	0	1261900	0	0
O95994;Q8TD06	AGR2	4	0	5	1	0	6	0	4	3	0	3	0	5	1	0	149220000	0	118980000	0	0	130020000	0	60918000	77273000	0	194230000	0	79845000	0	0
O96000	NDUFB10	2	0	3	0	1	3	0	3	0	0	2	1	0	0	0	57513000	0	36269000	0	0	111090000	0	47974000	0	0	139920000	0	0	0	0
O96005	CLPTM1	2	0	4	0	0	2	2	2	2	0	1	0	2	0	0	0	0	21779000	0	0	0	29959000	45628000	49088000	0	0	0	32276000	0	0
O96011	PEX11B	4	0	0	0	0	4	0	2	1	0	4	0	1	0	0	58416000	0	0	0	0	36972000	0	0	0	0	58988000	0	0	0	0
O96019;O94805	ACTL6A	4	0	3	0	0	2	0	4	1	1	2	1	2	1	1	30759000	0	33251000	0	0	49741000	0	37075000	0	0	21457000	0	0	0	0
P00167	CYB5A	2	0	1	0	0	2	0	1	0	0	0	3	0	0	0	28678000	0	0	0	0	26395000	0	0	0	0	0	87365000	0	0	0
P00367;P49448	GLUD1;GLUD2	14	2	15	1	1	8	0	8	8	0	8	6	8	3	1	322980000	73492000	287590000	0	0	227300000	0	165600000	152700000	0	536330000	268460000	259970000	116620000	0
P00390	GSR	3	2	5	0	2	4	2	3	3	2	3	0	4	1	0	41559000	35758000	59639000	0	28427000	43978000	38617000	38656000	44187000	37100000	73532000	0	43242000	0	0
P00403	MT-CO2	4	1	3	1	0	2	1	2	2	1	2	2	2	1	1	175740000	0	180320000	0	0	388200000	0	254960000	135250000	0	393050000	428420000	335500000	0	0
P00441	SOD1	1	1	3	2	2	0	0	2	1	0	0	0	1	0	0	0	0	66443000	0	42593000	0	0	38109000	0	0	0	0	0	0	0
P00450	CP	0	3	0	0	0	0	0	0	0	0	0	0	0	0	0	0	32854000	0	0	0	0	0	0	0	0	0	0	0	0	0
P00492	HPRT1	4	1	3	0	1	2	1	3	1	0	2	1	1	0	0	44552000	0	31063000	0	0	42149000	0	24577000	0	0	19856000	0	0	0	0
P00533	EGFR	3	0	3	0	0	2	0	0	1	0	0	0	1	0	0	14924000	0	19034000	0	0	16660000	0	0	0	0	0	0	0	0	0
P00568;Q9Y6K8	AK1	3	0	4	1	2	5	2	3	2	1	1	3	1	1	1	35538000	0	32672000	0	25920000	69258000	47495000	44505000	36856000	0	0	59740000	0	0	0
P00738;P00739	HP	0	15	4	0	8	0	2	5	1	0	0	2	0	0	0	0	848650000	42769000	0	111220000	0	22703000	89933000	0	0	0	28566000	0	0	0
P00742	F10	0	1	1	0	1	0	0	0	0	0	0	0	0	0	0	0	0	62147000	0	0	0	0	0	0	0	0	0	0	0	0
P00747	PLG	0	1	0	0	0	0	0	0	0	0	0	2	0	0	0	0	0	0	0	0	0	0	0	0	0	0	68617000	0	0	0
P00749	PLAU	1	0	0	0	0	2	0	0	0	0	1	0	0	0	0	0	0	0	0	0	0	0	0	0	0	0	0	0	0	0
P00750	PLAT	2	0	1	0	0	2	0	1	1	0	2	0	3	0	0	8525900	0	0	0	0	7921500	0	0	0	0	0	0	0	0	0
P00751	CFB	0	3	1	0	0	0	0	0	1	0	0	0	1	0	0	0	237280000	0	0	0	0	0	0	0	0	0	0	0	0	0
P00846	MT-ATP6	1	1	2	1	1	1	1	1	1	1	1	1	1	1	0	0	1856200000	0	0	1328000000	0	0	0	0	0	0	0	0	0	0
P00918	CA2	0	0	0	0	0	0	0	0	0	0	0	8	0	0	0	0	0	0	0	0	0	0	0	0	0	0	899510000	0	0	0
P00973	OAS1	0	0	3	0	0	0	0	0	0	0	0	0	0	0	0	0	0	22041000	0	0	0	0	0	0	0	0	0	0	0	0
P01009	SERPINA1	0	5	1	0	4	0	1	8	0	0	0	4	0	0	0	0	202670000	0	0	93800000	0	0	114810000	0	0	0	81904000	0	0	0
P01011	SERPINA3	0	1	0	0	0	0	0	2	0	0	0	0	0	0	0	0	22633000	0	0	0	0	0	0	0	0	0	0	0	0	0
P01023	A2M	0	7	0	0	2	0	0	2	0	0	0	0	0	0	0	0	47033000	0	0	22820000	0	0	0	0	0	0	0	0	0	0
P01024;O95568	C3	0	12	4	0	2	0	11	6	0	0	0	23	0	0	0	0	219840000	18615000	0	44880000	0	123400000	40072000	0	0	0	670040000	0	0	0
P01033	TIMP1	1	1	1	0	1	1	0	0	0	0	0	0	0	0	0	0	0	0	0	0	0	0	0	0	0	0	0	0	0	0
P01034	CST3	2	1	2	0	1	2	1	0	0	0	1	0	1	0	0	30109000	0	18293000	0	0	0	0	0	0	0	0	0	0	0	0
P01036	CST4	0	3	2	1	4	0	2	2	3	2	0	1	1	1	1	0	223070000	53844000	0	134300000	0	137970000	59589000	86757000	121290000	0	0	58685000	0	0
P01037	CST1	0	5	4	1	5	0	4	4	4	4	0	1	2	1	1	0	139780000	34070000	0	102150000	0	0	0	0	0	0	0	0	0	0
P01112	HRAS	2	0	0	0	0	2	0	0	0	0	1	0	0	0	0	0	0	0	0	0	29537000	0	0	0	0	0	0	0	0	0
P01130	LDLR	7	0	4	0	0	8	0	1	2	0	5	0	0	0	0	53954000	0	60573000	0	0	105260000	0	0	81941000	0	92013000	0	0	0	0
P01594;P01593		0	0	0	0	0	0	0	0	0	0	0	1	0	0	0	0	0	0	0	0	0	0	0	0	0	0	0	0	0	0
P01768;P01764;A0A0B4J1X5;P01767;P01772	IGHV3-23;IGHV3-74	0	2	0	0	1	0	1	0	1	0	0	1	0	0	0	0	27262000	0	0	0	0	0	0	0	0	0	0	0	0	0
P01859	IGHG2	0	9	6	3	6	0	9	5	4	3	0	8	1	1	3	0	501260000	56169000	0	0	0	616220000	55810000	0	0	0	842140000	0	0	0
P01860	IGHG3	0	10	7	3	9	0	10	6	5	6	0	9	3	2	5	0	295210000	0	0	181470000	0	404610000	142250000	0	0	0	643550000	0	0	0
P01861	IGHG4	0	6	5	2	6	0	8	5	3	3	0	7	2	1	3	0	0	0	0	0	0	63573000	0	0	0	0	0	0	0	0
P01871;P04220	IGHM	0	3	0	0	1	0	0	0	0	0	0	0	0	0	0	0	50802000	0	0	0	0	0	0	0	0	0	0	0	0	0
P01877	IGHA2	1	12	10	2	9	2	6	10	7	5	0	7	4	4	4	0	629470000	39758000	0	73623000	0	0	22418000	0	0	0	114340000	0	0	0
P02042;P69892;P69891;P02100	HBD	2	5	5	3	5	0	3	7	4	5	0	2	2	1	1	0	0	0	0	0	0	0	29082000	0	0	0	0	0	0	0
P02144	MB	0	2	2	0	2	0	2	2	0	0	0	0	0	0	0	0	3199800000	439220000	0	1390700000	0	306930000	498710000	0	0	0	0	0	0	0
P02452;CON__Q862S4	COL1A1	0	1	3	4	2	0	3	2	2	2	0	1	4	2	0	0	0	30471000	63732000	0	0	58955000	45130000	44427000	52297000	0	0	92436000	63526000	0
P02462;P29400	COL4A1;COL4A5	0	1	1	1	0	0	3	3	2	1	0	0	1	1	0	0	0	0	0	0	0	66664000	49555000	51349000	0	0	0	0	0	0
P02647	APOA1	0	4	2	0	1	0	0	9	0	0	0	3	0	0	0	0	145490000	30068000	0	0	0	0	419920000	0	0	0	108960000	0	0	0
P02671	FGA	0	5	0	0	1	0	0	0	0	0	0	8	0	0	0	0	227340000	0	0	0	0	0	0	0	0	0	288850000	0	0	0
P02675	FGB	0	11	1	0	3	0	1	0	0	0	0	10	0	0	0	0	706040000	0	0	129340000	0	0	0	0	0	0	435380000	0	0	0
P02679	FGG	0	8	2	0	2	0	0	0	0	0	0	8	0	0	0	0	669540000	84327000	0	92623000	0	0	0	0	0	0	590580000	0	0	0
P02746	C1QB	0	0	0	0	0	0	0	0	0	0	0	1	0	0	0	0	0	0	0	0	0	0	0	0	0	0	25821000	0	0	0
P02747	C1QC	0	0	0	0	0	0	0	0	0	0	0	2	0	0	0	0	0	0	0	0	0	0	0	0	0	0	43936000	0	0	0
P02749	APOH	0	2	0	0	0	0	2	0	0	0	0	1	0	0	0	0	31049000	0	0	0	0	31136000	0	0	0	0	0	0	0	0
P02787	TF	0	23	5	0	14	0	17	2	3	0	0	5	0	0	0	0	1359800000	53423000	0	409190000	0	614790000	16175000	29909000	0	0	130580000	0	0	0
P02790	HPX	0	1	0	0	0	0	1	0	0	0	0	2	0	0	0	0	0	0	0	0	0	0	0	0	0	0	0	0	0	0
P02794	FTH1	0	0	2	0	0	0	0	0	0	0	0	0	0	0	0	0	0	18090000	0	0	0	0	0	0	0	0	0	0	0	0
P02808	STATH	0	0	0	0	0	0	0	0	0	0	0	1	0	0	0	0	0	0	0	0	0	0	0	0	0	0	22417000	0	0	0
P02812	PRB2	0	0	0	0	0	0	0	2	1	0	0	0	1	0	0	0	0	0	0	0	0	0	9669100	0	0	0	0	0	0	0
P03886	MT-ND1	0	0	1	0	0	1	1	2	1	2	0	0	2	1	1	0	0	0	0	0	0	0	21172000	0	26570000	0	0	30458000	0	0
P03905	MT-ND4	0	0	1	1	0	2	1	3	2	1	1	1	3	1	1	0	0	0	0	0	31940000	0	36834000	32320000	0	0	0	52403000	0	0
P03915	MT-ND5	0	0	1	0	0	1	1	1	2	1	1	1	3	1	1	0	0	0	0	0	0	0	0	0	0	0	0	73612000	0	0
P03928	MT-ATP8	0	0	0	0	0	2	0	0	0	0	2	0	0	0	0	0	0	0	0	0	33084000	0	0	0	0	38511000	0	0	0	0
P03973	SLPI	0	3	2	2	2	0	2	2	2	0	0	1	0	0	0	0	257400000	97542000	210940000	0	0	119310000	93294000	85336000	0	0	0	0	0	0
P04003	C4BPA	0	1	0	0	0	0	0	0	0	0	0	0	0	0	0	0	3832300	0	0	0	0	0	0	0	0	0	0	0	0	0
P04062	GBA	3	3	3	1	4	5	1	3	2	2	2	5	1	1	1	25717000	68651000	69325000	0	78645000	33804000	0	53868000	43509000	35069000	43243000	167990000	0	0	0
P04114	APOB	1	0	0	0	0	1	0	1	1	0	0	0	0	0	0	0	0	0	0	0	0	0	0	0	0	0	0	0	0	0
P04156	PRNP	2	2	2	0	2	2	1	2	2	1	1	0	2	1	1	244930000	62282000	143650000	0	53407000	129310000	0	113810000	97760000	0	202180000	0	78613000	0	0
P04179	SOD2	3	0	3	0	0	6	0	1	1	0	2	1	1	0	0	61364000	0	69866000	0	0	151480000	0	0	0	0	160510000	0	0	0	0
P04181	OAT	13	1	10	1	2	14	2	13	9	1	8	0	8	1	0	368320000	0	282530000	0	0	445040000	18343000	179000000	197170000	0	356450000	0	183890000	0	0
P04183	TK1	2	0	3	0	0	2	0	1	1	0	0	0	0	0	0	81065000	0	0	0	0	97426000	0	0	0	0	0	0	0	0	0
P04259	KRT6B	24	57	57	37	61	16	46	48	50	44	8	46	44	48	44	0	881290000	0	0	668660000	0	661230000	403610000	421530000	365970000	0	0	0	981200000	0
P04350	TUBB4A	22	12	23	7	14	21	13	19	17	13	11	17	16	14	11	86077000	0	51422000	0	0	110570000	0	33995000	51358000	0	0	0	28442000	0	0
P04439;P13746	HLA-A	7	2	11	1	3	4	0	3	3	1	4	1	3	1	0	0	0	0	0	0	0	0	0	0	0	0	0	0	0	0
P04632	CAPNS1	5	1	2	0	1	4	1	3	3	0	2	2	3	1	0	208590000	0	115370000	0	0	173960000	0	109040000	97241000	0	197230000	147670000	99248000	0	0
P04920	SLC4A2	2	0	3	0	0	0	0	1	0	0	0	0	2	0	0	11871000	0	9974400	0	0	0	0	0	0	0	0	0	0	0	0
P05023;Q13733	ATP1A1	22	1	25	3	3	15	1	14	12	0	13	3	13	3	0	477930000	0	558630000	71678000	60997000	456160000	0	361600000	364410000	0	565090000	0	483220000	65803000	0
P05026	ATP1B1	1	0	0	0	0	1	0	0	0	0	2	1	0	0	0	0	0	0	0	0	0	0	0	0	0	0	0	0	0	0
P05067	APP	12	1	11	1	1	6	0	3	5	0	6	0	6	1	0	230240000	0	130080000	0	0	132990000	0	73881000	64571000	0	240720000	0	92424000	0	0
P05091	ALDH2	1	0	1	0	0	0	3	0	1	0	0	12	1	1	0	0	0	0	0	0	0	0	0	0	0	0	1060700000	0	0	0
P05120	SERPINB2	0	1	1	1	4	0	3	0	0	0	0	4	0	0	0	0	0	0	0	41482000	0	60147000	0	0	0	0	72194000	0	0	0
P05164;P11678	MPO	0	21	0	0	3	0	1	0	2	0	0	0	0	0	0	0	1343000000	0	0	21477000	0	0	0	23122000	0	0	0	0	0	0
P05204	HMGN2	1	1	3	1	2	1	2	3	2	1	1	2	2	2	1	0	0	203620000	0	178170000	0	395920000	462380000	235080000	0	0	139120000	218450000	247610000	0
P05362	ICAM1	6	0	3	0	0	1	0	0	0	0	0	0	1	0	0	25335000	0	40561000	0	0	0	0	0	0	0	0	0	0	0	0
P05386	RPLP1	1	1	1	0	1	2	0	1	1	1	0	2	1	1	1	0	0	0	0	0	32491000	0	0	0	0	0	121270000	0	0	0
P05412	JUN	1	0	1	0	0	0	0	0	0	0	0	0	0	0	0	0	0	0	0	0	0	0	0	0	0	0	0	0	0	0
P05413	FABP3	0	0	0	0	0	0	0	0	0	0	0	0	0	0	0	0	0	0	0	0	0	0	0	0	0	0	0	0	0	0
P05455	SSB	14	1	9	1	3	15	4	9	8	4	3	1	7	2	0	503570000	0	189790000	0	40454000	525870000	63586000	224780000	127030000	51970000	122210000	0	131580000	0	0
P05534;P30447	HLA-A	12	3	14	1	3	9	1	7	5	1	7	1	6	2	0	664860000	81025000	534470000	0	128230000	263010000	0	138690000	125320000	0	285850000	0	209210000	72776000	0
P05814	CSN2	0	0	0	0	0	0	0	0	0	0	0	0	0	0	0	0	0	0	0	0	0	0	0	0	0	0	0	0	0	0
P05976;P08590	MYL1	0	0	0	0	0	0	0	0	0	0	0	2	0	0	0	0	0	0	0	0	0	0	0	0	0	0	0	0	0	0
P06132	UROD	3	0	1	0	0	4	0	3	0	0	1	0	1	0	0	25268000	0	0	0	0	0	0	22192000	0	0	0	0	0	0	0
P06280	GLA	1	0	0	0	0	0	0	0	0	0	0	2	0	0	0	0	0	0	0	0	0	0	0	0	0	0	3694600	0	0	0
P06396	GSN	5	6	11	3	5	7	8	9	8	2	1	20	6	4	0	86637000	285390000	198920000	78042000	168650000	79693000	440840000	160330000	142280000	41062000	0	1932900000	130970000	113530000	0
P06454	PTMA	0	0	1	1	0	1	0	0	0	0	0	0	0	0	0	0	0	0	0	0	0	0	0	0	0	0	0	0	0	0
P06493	CDK1	9	1	4	1	1	8	3	6	7	2	3	0	1	0	0	103970000	0	83973000	0	0	126630000	77117000	101040000	105320000	117910000	59290000	0	0	0	0
P06703	S100A6	2	1	2	2	1	2	1	2	1	1	2	1	2	1	1	166500000	0	486430000	670570000	0	197980000	0	191810000	0	0	218860000	0	126960000	0	0
P06730	EIF4E	1	0	2	0	0	4	0	2	1	0	2	1	2	1	0	0	0	63259000	0	0	130910000	0	68328000	0	0	135530000	0	65472000	0	0
P06732	CKM	0	0	0	1	1	0	0	0	0	0	0	2	0	0	0	0	0	0	0	0	0	0	0	0	0	0	246650000	0	0	0
P06737	PYGL	32	8	31	3	7	27	7	27	18	7	16	13	19	9	3	846440000	41587000	606260000	0	24698000	538700000	65713000	287710000	265380000	37539000	453610000	209330000	266840000	61868000	0
P06744	GPI	15	2	14	1	2	11	5	7	8	0	4	9	7	4	1	605160000	92896000	458500000	0	82144000	368240000	196240000	173380000	220370000	0	340040000	722210000	212600000	113900000	0
P06753	TPM3	5	3	10	2	7	9	3	4	4	1	6	12	3	2	1	112170000	74100000	226510000	169660000	120620000	344380000	119530000	187020000	116240000	53766000	286020000	685760000	124770000	58190000	0
P06858	LPL	0	0	0	0	0	0	0	0	0	0	0	0	0	0	0	0	0	0	0	0	0	0	0	0	0	0	0	0	0	0
Q16778;P33778;P23527;P06899;Q6DRA6;Q6DN03	HIST2H2BE;HIST1H2BB;HIST1H2BO;HIST1H2BJ	10	6	11	5	7	13	11	13	12	11	13	12	11	10	10	1166700000	870640000	583060000	0	0	1346900000	0	3758800000	3902300000	4740000000	1071400000	1312400000	1853700000	1449400000	0
P07099	EPHX1	14	1	12	1	3	12	0	13	5	0	10	0	10	2	0	557520000	0	470320000	0	53738000	361410000	0	219110000	154240000	0	350930000	0	243540000	49933000	0
P07108	DBI	0	0	1	0	1	0	0	0	0	0	0	3	0	0	0	0	0	0	0	0	0	0	0	0	0	0	328420000	0	0	0
P07196	NEFL	14	1	11	3	3	10	5	12	12	2	6	1	13	8	2	109750000	0	166370000	224050000	0	178150000	126280000	259980000	203980000	0	156250000	0	237630000	173960000	0
P07199	CENPB	1	0	1	0	0	0	0	0	0	0	1	0	0	0	0	0	0	0	0	0	0	0	0	0	0	0	0	0	0	0
P07203	GPX1	3	0	2	0	1	1	1	2	1	0	1	0	0	0	0	51675000	0	48675000	0	0	0	0	0	0	0	0	0	0	0	0
P07451	CA3	0	0	0	0	0	0	0	0	0	0	0	0	0	0	0	0	0	0	0	0	0	0	0	0	0	0	0	0	0	0
P07476	IVL	0	10	6	4	7	0	10	2	1	0	0	25	0	1	1	0	220760000	70678000	208350000	165930000	0	325750000	0	0	0	0	5200500000	0	0	0
P07550	ADRB2	0	0	1	0	0	0	0	0	0	0	0	0	0	0	0	0	0	0	0	0	0	0	0	0	0	0	0	0	0	0
P07602	PSAP	5	0	6	2	0	7	0	3	1	0	6	0	3	0	0	118930000	0	100190000	66692000	0	145670000	0	92326000	0	0	173770000	0	24370000	0	0
P07686	HEXB	2	2	5	3	5	6	2	2	3	1	2	4	3	3	1	39155000	49445000	38969000	54965000	43366000	35594000	0	0	29085000	0	59304000	55983000	26189000	39329000	0
P07711	CTSL	0	0	0	0	0	0	0	0	0	0	0	0	0	0	0	0	0	0	0	0	0	0	0	0	0	0	0	0	0	0
P07741	APRT	3	0	1	0	0	2	1	1	0	0	2	4	0	0	0	107270000	0	0	0	0	0	0	0	0	0	85864000	270650000	0	0	0
P07858	CTSB	0	3	3	0	1	0	1	0	1	0	0	4	0	0	1	0	117290000	0	0	0	0	0	0	0	0	0	182540000	0	0	0
P07942	LAMB1	1	2	3	4	3	4	4	7	4	3	0	1	8	2	1	0	55061000	27955000	73720000	28914000	42259000	42229000	44648000	43078000	47116000	0	0	45502000	0	0
P07947;P06241	YES1	4	1	5	0	0	4	1	2	3	0	5	0	1	0	0	0	0	0	0	0	24262000	0	0	0	0	0	0	0	0	0
P07951;CON__Q3SX28	TPM2	2	2	5	1	2	1	1	1	1	0	1	6	0	0	0	0	0	0	0	0	0	0	0	0	0	0	91567000	0	0	0
P08123	COL1A2	0	1	0	1	0	0	3	1	1	0	0	0	2	0	0	0	0	0	0	0	0	205510000	0	0	0	0	0	14495000	0	0
P08134;P62745	RHOC	7	3	7	1	3	8	1	3	4	1	5	1	3	2	0	0	0	0	0	0	0	0	0	0	0	0	0	0	0	0
P08174	CD55	4	1	4	1	0	5	0	2	2	0	5	0	2	0	0	66711000	0	82465000	0	0	81895000	0	40270000	35433000	0	150710000	0	68393000	0	0
P08195	SLC3A2	13	0	11	0	2	14	2	7	7	1	10	0	7	2	0	310070000	0	262880000	0	36501000	323910000	67212000	146040000	138510000	0	463560000	0	132360000	61923000	0
P08237	PFKM	3	0	6	0	0	5	1	2	4	0	2	2	2	1	0	29952000	0	30296000	0	0	38279000	0	0	41829000	0	39072000	0	0	0	0
P08243	ASNS	0	0	2	0	0	1	0	0	0	0	0	0	0	0	0	0	0	17247000	0	0	0	0	0	0	0	0	0	0	0	0
P08246	ELANE	0	5	0	0	1	0	0	0	0	0	0	1	0	0	0	0	608930000	0	0	0	0	0	0	0	0	0	0	0	0	0
P08294	SOD3	1	0	1	0	1	3	0	0	0	0	3	0	0	0	0	0	0	0	0	0	22529000	0	0	0	0	49593000	0	0	0	0
P08311	CTSG	0	8	0	0	1	0	0	0	1	0	0	0	0	0	0	0	709790000	0	0	0	0	0	0	0	0	0	0	0	0	0
P08559	PDHA1	10	1	11	1	3	10	3	11	6	1	3	2	10	3	1	331740000	0	268570000	0	55900000	390700000	66926000	221300000	184810000	0	218620000	75009000	293860000	110230000	0
P08574	CYC1	6	1	5	0	3	8	1	7	4	2	4	1	5	3	1	510630000	0	290630000	0	121880000	780700000	0	316210000	292940000	77119000	771150000	0	274830000	134850000	0
P08579	SNRPB2	3	0	4	0	1	3	1	3	3	3	2	1	3	1	1	19908000	0	21254000	0	0	0	0	0	0	0	0	0	0	0	0
P08603;Q03591;Q02985	CFH	0	0	0	0	0	0	0	0	0	0	0	4	0	0	0	0	0	0	0	0	0	0	0	0	0	0	31775000	0	0	0
P08648	ITGA5	0	0	0	0	0	4	0	2	0	0	1	0	1	0	0	0	0	0	0	0	15060000	0	11203000	0	0	0	0	0	0	0
P08651	NFIC	1	0	1	0	0	3	0	2	1	0	1	0	2	1	0	0	0	0	0	0	13943000	0	0	0	0	0	0	0	0	0
P08754	GNAI3	4	3	6	2	3	8	2	4	5	2	5	2	4	3	2	0	0	21531000	0	0	0	0	0	0	0	0	0	0	0	0
P08842	STS	0	1	0	1	1	0	1	1	0	0	0	1	1	0	0	0	0	0	35179000	0	0	0	0	0	0	0	0	0	0	0
P08962	CD63	3	1	3	0	1	1	0	1	1	1	0	0	1	0	0	270930000	0	408530000	0	0	0	0	0	0	0	0	0	0	0	0
P09001	MRPL3	1	0	0	0	0	4	0	1	1	0	0	0	2	0	0	0	0	0	0	0	37847000	0	0	0	0	0	0	0	0	0
P09012	SNRPA	4	0	5	0	2	3	1	3	3	3	2	1	2	1	0	91410000	0	131550000	0	108020000	108880000	0	139630000	131200000	166540000	98300000	0	130380000	0	0
P09104	ENO2	6	1	5	1	2	4	2	3	3	2	1	4	2	2	1	22960000	0	22577000	0	0	0	0	0	0	0	0	0	0	0	0
P09110	ACAA1	7	0	4	0	0	3	0	5	2	0	2	1	2	0	0	107400000	0	62975000	0	0	91197000	0	27112000	47394000	0	42490000	0	45622000	0	0
P09132	SRP19	2	0	1	0	0	1	0	0	0	0	0	0	1	0	0	0	0	0	0	0	50099000	0	0	0	0	0	0	0	0	0
P09228	CST2	0	3	1	2	2	0	1	1	1	1	0	0	0	0	0	0	0	0	8801200	0	0	0	0	0	0	0	0	0	0	0
P09234	SNRPC	1	1	1	0	1	1	1	2	1	0	1	0	0	0	0	0	0	0	0	0	0	0	0	0	0	77452000	0	0	0	0
P09417	QDPR	1	0	1	0	0	0	0	0	0	0	0	0	0	0	0	3269100	0	0	0	0	0	0	0	0	0	0	0	0	0	0
P09486	SPARC	0	0	0	0	0	0	0	0	0	0	3	0	0	0	0	0	0	0	0	0	0	0	0	0	0	51762000	0	0	0	0
P09493	TPM1	2	2	5	1	2	1	1	1	1	0	1	4	0	0	0	0	0	0	0	0	0	0	0	0	0	0	0	0	0	0
P09496	CLTA	0	0	3	0	0	1	0	0	0	0	1	0	0	0	0	0	0	50606000	0	0	0	0	0	0	0	0	0	0	0	0
P09497	CLTB	1	1	4	0	1	1	0	1	1	0	1	3	1	0	0	0	0	101730000	0	0	0	0	0	0	0	0	73814000	0	0	0
P09525	ANXA4	7	1	3	1	1	4	5	4	2	1	2	9	3	2	0	56217000	0	69635000	0	0	35068000	64794000	28669000	40535000	0	39224000	173280000	25311000	39955000	0
P09543	CNP	9	0	5	2	0	7	0	6	3	0	5	2	4	0	0	111480000	0	58931000	0	0	63979000	0	56552000	51309000	0	88240000	40897000	76217000	0	0
P09601	HMOX1	0	0	0	0	0	0	0	0	0	0	0	6	0	0	0	0	0	0	0	0	0	0	0	0	0	0	318100000	0	0	0
P09661	SNRPA1	5	0	3	0	0	10	0	4	3	2	6	2	4	2	1	102180000	0	67034000	0	0	232670000	0	99220000	89652000	71195000	128510000	50131000	125290000	44363000	0
P09668	CTSH	0	0	0	0	0	0	1	0	2	0	0	1	0	0	0	0	0	0	0	0	0	0	0	4746500	0	0	0	0	0	0
P09669	COX6C	3	0	3	0	0	2	1	1	2	0	2	2	1	1	0	83442000	0	56782000	0	0	239460000	0	0	108030000	0	213670000	0	0	0	0
P09758	TACSTD2	0	0	0	0	0	0	0	0	0	0	0	2	0	0	0	0	0	0	0	0	0	0	0	0	0	0	49038000	0	0	0
P09913	IFIT2	7	0	6	0	0	0	0	0	0	0	0	0	1	0	0	58776000	0	68767000	0	0	0	0	0	0	0	0	0	0	0	0
P09914	IFIT1	13	0	12	0	5	2	0	0	0	0	2	0	1	0	0	358730000	0	267150000	0	64240000	0	0	0	0	0	29537000	0	0	0	0
P09960	LTA4H	9	1	8	0	0	7	4	10	8	3	2	8	5	1	1	115660000	0	83229000	0	0	106080000	85727000	131970000	92035000	46847000	63617000	147540000	101360000	0	0
P09972	ALDOC	9	2	8	0	3	8	5	5	5	2	5	7	5	3	0	189690000	118180000	165460000	0	83218000	68229000	70092000	72109000	41760000	0	86371000	112770000	75328000	0	0
P0C0L4;P0C0L5	C4A;C4B	0	1	0	0	1	0	1	1	1	1	0	10	1	1	1	0	0	0	0	0	0	0	0	0	0	0	208550000	0	0	0
Q99878;Q96KK5;Q9BTM1;P20671;P0C0S8	HIST1H2AJ;HIST1H2AH;H2AFJ;HIST1H2AD;HIST1H2AG	8	6	8	5	7	7	6	6	7	7	6	6	8	7	6	6098100	0	0	0	0	0	0	0	0	0	0	0	0	0	0
P0C869	PLA2G4B	0	0	0	0	0	0	0	0	0	0	0	6	0	0	1	0	0	0	0	0	0	0	0	0	0	0	196010000	0	0	0
P10155	TROVE2	2	1	1	1	1	1	0	2	2	0	0	1	0	0	0	0	0	0	0	0	0	0	20192000	20687000	0	0	0	0	0	0
P10163	PRB4	0	0	0	1	0	0	1	2	0	0	0	0	0	0	0	0	0	0	0	0	0	0	21511000	0	0	0	0	0	0	0
P10253	GAA	12	1	12	1	2	9	0	7	6	0	8	0	9	3	0	335780000	0	327860000	0	30406000	161470000	0	81146000	87666000	0	200550000	0	156270000	49955000	0
P10301	RRAS	4	0	4	0	1	6	1	2	3	1	5	0	2	0	0	97567000	0	88990000	0	0	95479000	0	39812000	50186000	0	109610000	0	45450000	0	0
P10316;P01891;P30453;P16190;P30457;P30450;P18462	HLA-A	8	1	9	0	2	5	0	2	1	1	4	1	1	1	0	0	0	8773000	0	0	0	0	0	0	0	0	0	0	0	0
P10321	HLA-C	8	1	10	0	2	3	0	2	1	0	3	2	2	0	0	0	0	0	0	0	0	0	0	0	0	0	0	0	0	0
P10398	ARAF	2	0	2	0	0	3	0	2	1	0	1	0	2	0	0	0	0	0	0	0	40619000	0	25994000	0	0	0	0	32890000	0	0
P10412;Q02539;P22492	HIST1H1E	7	14	14	5	14	8	9	10	11	10	8	9	9	8	9	0	1055700000	291010000	0	630060000	0	0	0	0	0	0	0	0	0	0
P10515	DLAT	11	0	10	1	2	15	3	12	12	1	6	3	11	3	0	446050000	0	414790000	0	35131000	686350000	21333000	299740000	241310000	0	292190000	45336000	372900000	41964000	0
P10606	COX5B	0	1	2	2	1	4	0	4	2	0	3	2	2	0	0	0	0	43297000	44612000	0	92164000	0	37838000	35635000	0	122030000	133820000	56571000	0	0
P10620	MGST1	3	2	3	2	3	3	1	2	2	1	3	1	1	1	1	71525000	57213000	92574000	86289000	76822000	89529000	0	110630000	109850000	0	150010000	0	0	0	0
P10644;P31321	PRKAR1A	11	0	12	0	2	9	1	8	6	0	6	0	5	2	0	467730000	0	450040000	0	40651000	303550000	0	177710000	204170000	0	168010000	0	160480000	43242000	0
P10768	ESD	7	0	4	0	1	8	1	5	5	1	3	2	4	1	0	300380000	0	81707000	0	0	241590000	0	97749000	137550000	0	132480000	103660000	72435000	0	0
P10909	CLU	2	3	2	1	4	3	2	4	3	0	1	2	4	1	1	14190000	169370000	39079000	0	133440000	16814000	35132000	36156000	32880000	0	0	38921000	34470000	0	0
P10916;Q9BUA6	MYL2	0	0	0	0	0	0	0	0	0	0	0	0	0	0	0	0	0	0	0	0	0	0	0	0	0	0	0	0	0	0
P11047	LAMC1	1	6	4	9	4	0	2	15	6	2	0	2	14	7	0	0	100280000	27083000	195780000	47191000	0	70120000	137640000	60810000	42941000	0	23518000	197780000	74025000	0
P11055;A7E2Y1	MYH3	1	0	0	0	0	1	0	0	0	0	1	18	0	0	0	0	0	0	0	0	0	0	0	0	0	0	513390000	0	0	0
P11117	ACP2	3	0	0	0	0	2	0	0	0	0	1	0	0	0	0	0	0	0	0	0	0	0	0	0	0	0	0	0	0	0
P11166	SLC2A1	2	1	2	0	0	1	0	1	0	0	1	0	0	0	0	48055000	0	37179000	0	0	0	0	0	0	0	0	0	0	0	0
P11172	UMPS	0	0	1	0	0	0	0	0	0	0	0	0	0	0	0	0	0	0	0	0	0	0	0	0	0	0	0	0	0	0
P11182	DBT	1	0	2	0	0	2	1	0	1	0	0	1	0	1	0	0	0	12820000	0	0	0	0	0	0	0	0	0	0	0	0
P11217	PYGM	8	6	9	3	6	9	5	8	6	5	6	12	8	6	3	0	0	0	0	0	0	0	0	0	0	0	772370000	0	0	0
P11233	RALA	2	1	4	0	1	3	0	2	0	0	1	2	0	1	0	0	0	28420000	0	0	0	0	0	0	0	0	0	0	0	0
P11234	RALB	2	0	3	0	1	3	0	2	0	0	2	1	0	0	0	0	0	85464000	0	0	67639000	0	0	0	0	0	0	0	0	0
P11310	ACADM	3	0	3	0	0	4	1	3	3	0	3	0	4	0	0	45186000	0	0	0	0	66469000	0	49107000	45369000	0	74841000	0	65457000	0	0
P11388	TOP2A	4	0	4	0	0	6	2	13	8	3	3	0	5	1	0	0	0	0	0	0	0	0	30492000	22393000	34236000	0	0	0	0	0
P11413	G6PD	12	2	15	0	7	13	5	18	15	4	6	4	10	3	0	402540000	60683000	367200000	0	109950000	301510000	94984000	229130000	259220000	77785000	208950000	79975000	86554000	42113000	0
P11441	UBL4A	2	0	0	0	0	1	0	0	0	0	0	0	0	0	0	0	0	0	0	0	0	0	0	0	0	0	0	0	0	0
P11717	IGF2R	11	1	17	0	0	20	0	10	6	0	9	0	7	0	0	94922000	0	127930000	0	0	187190000	0	98762000	60208000	0	158290000	0	76600000	0	0
P11766	ADH5	6	0	4	1	2	5	0	2	1	0	2	1	2	1	0	73504000	0	53444000	0	0	64337000	0	46948000	0	0	47696000	0	48762000	0	0
P11908	PRPS2	6	1	2	0	1	3	0	1	1	0	2	0	2	0	0	0	0	11330000	0	0	0	0	0	0	0	0	0	0	0	0
P11926	ODC1	0	0	0	0	0	1	0	0	0	0	0	0	0	0	0	0	0	0	0	0	1644100	0	0	0	0	0	0	0	0	0
P12004	PCNA	6	1	8	1	1	9	2	10	5	3	2	0	6	2	1	156720000	0	225130000	0	0	339530000	63217000	281960000	166130000	77533000	110090000	0	135160000	51101000	0
P12074	COX6A1	0	0	1	0	0	0	0	1	0	0	0	0	0	0	0	0	0	23815000	0	0	0	0	0	0	0	0	0	0	0	0
P12081	HARS	7	6	8	3	5	10	3	5	6	2	4	8	4	4	1	70648000	83539000	88804000	62111000	82306000	109640000	94504000	66285000	75731000	0	74101000	133670000	69650000	82921000	0
P12110	COL6A2	4	1	6	0	2	6	0	3	1	1	3	0	5	0	0	62665000	0	61406000	0	19613000	60060000	0	49657000	0	0	70613000	0	63376000	0	0
P12235	SLC25A4	13	5	11	4	6	13	7	11	13	7	7	6	10	7	8	39078000	0	26341000	0	0	0	0	31714000	21571000	0	0	0	0	0	0
P12268	IMPDH2	13	2	17	1	6	18	9	17	14	6	10	7	11	3	0	658010000	95971000	654650000	0	221480000	873590000	360840000	645210000	677700000	204510000	366610000	225010000	225530000	0	0
P12270	TPR	8	1	8	2	1	3	4	20	7	3	2	1	11	6	1	186390000	0	525700000	289520000	0	36675000	434360000	770760000	414260000	320260000	58708000	0	561860000	483060000	0
P12277	CKB	0	0	0	0	0	0	0	0	0	0	0	3	0	0	0	0	0	0	0	0	0	0	0	0	0	0	104660000	0	0	0
Q92637;P12314	FCGR1B;FCGR1A	0	0	0	0	0	0	0	0	0	0	0	1	0	0	0	0	0	0	0	0	0	0	0	0	0	0	50310000	0	0	0
P12429	ANXA3	5	6	6	0	2	7	2	5	4	2	4	1	1	1	0	38479000	66981000	38744000	0	32051000	57245000	37945000	33353000	33511000	33231000	35631000	0	0	0	0
P12532;P17540	CKMT1A	1	0	1	0	0	1	3	7	5	1	0	10	1	1	0	0	0	0	0	0	0	261470000	197950000	101930000	0	0	691850000	0	0	0
P12694	BCKDHA	0	0	0	0	0	0	0	0	0	0	0	0	0	0	0	0	0	0	0	0	0	0	0	0	0	0	0	0	0	0
P12724	RNASE3	0	1	0	0	0	0	0	0	0	0	0	0	0	0	0	0	44533000	0	0	0	0	0	0	0	0	0	0	0	0	0
P12829	MYL4	0	0	0	0	0	0	0	0	0	0	0	0	0	0	0	0	0	0	0	0	0	0	0	0	0	0	0	0	0	0
P12830	CDH1	0	0	0	0	0	0	0	0	0	0	0	2	0	0	0	0	0	0	0	0	0	0	0	0	0	0	79580000	0	0	0
P12882	MYH1	1	0	0	0	1	1	0	0	0	0	1	21	0	0	0	0	0	0	0	0	0	0	0	0	0	0	0	0	0	0
P12883;Q9H6N6	MYH7	1	0	0	0	0	1	0	0	0	0	1	17	0	0	0	0	0	0	0	0	0	0	0	0	0	0	1090600000	0	0	0
P12931;P07948;P08631;Q9H3Y6;P42685;P06239	SRC	8	1	8	0	2	5	1	5	3	0	4	0	2	0	0	99260000	0	76210000	0	0	83000000	0	70580000	0	0	92113000	0	0	0	0
P12955	PEPD	1	2	4	2	3	1	0	1	1	0	0	0	0	0	0	0	48536000	33610000	0	35126000	0	0	0	0	0	0	0	0	0	0
P13164;Q01629	IFITM1;IFITM2	3	2	3	0	2	1	1	1	1	1	1	0	1	1	0	0	0	0	0	0	0	0	0	0	0	0	0	0	0	0
P13473	LAMP2	3	0	3	2	2	2	0	1	1	0	0	0	2	0	0	81180000	0	0	0	0	112350000	0	0	0	0	0	0	0	0	0
P13533	MYH6	1	0	1	0	0	1	0	0	0	0	1	17	0	0	0	0	0	0	0	0	0	0	0	0	0	0	107280000	0	0	0
P13535	MYH8	1	0	0	0	1	1	0	0	0	0	1	19	0	0	0	0	0	0	0	0	0	0	0	0	0	0	85777000	0	0	0
P13637	ATP1A3	9	0	12	2	0	8	0	8	7	0	6	1	8	0	0	0	0	0	0	0	0	0	0	0	0	0	0	0	0	0
P13693;Q56UQ5	TPT1	2	1	3	0	0	3	0	3	1	0	0	3	0	0	0	56047000	0	50452000	0	0	18539000	0	20784000	0	0	0	149990000	0	0	0
P13716	ALAD	0	0	4	0	2	1	1	1	2	0	0	1	0	0	0	0	0	20221000	0	0	0	0	0	19052000	0	0	0	0	0	0
P13727	PRG2	0	3	0	0	0	0	0	0	0	0	0	0	0	0	0	0	28364000	0	0	0	0	0	0	0	0	0	0	0	0	0
P13747	HLA-E	2	1	2	1	1	2	0	1	0	0	2	1	2	0	0	0	0	0	0	0	0	0	0	0	0	0	0	0	0	0
P13796	LCP1	14	9	13	3	3	10	3	8	10	2	3	10	5	1	0	105650000	83351000	64619000	0	0	31176000	27753000	30020000	39225000	0	0	96097000	26682000	0	0
P13798	APEH	11	5	8	3	5	11	3	10	8	3	2	4	1	2	0	119940000	110320000	132050000	42003000	74772000	118690000	86514000	96758000	112030000	81319000	28915000	79567000	0	35175000	0
P13807;P54840	GYS1	4	0	3	0	0	5	0	2	1	0	0	0	0	0	0	46318000	0	40322000	0	0	32134000	0	16638000	0	0	0	0	0	0	0
P13861;P31323	PRKAR2A	5	0	6	0	1	5	1	3	4	0	3	1	4	0	0	105670000	0	104640000	0	0	122890000	0	54195000	62604000	0	0	0	46888000	0	0
P13928	ANXA8	0	0	0	0	0	0	7	0	0	0	0	11	0	0	0	0	0	0	0	0	0	111770000	0	0	0	0	668100000	0	0	0
P13929	ENO3	4	1	2	1	2	3	2	3	3	2	1	7	2	2	1	0	0	0	0	0	0	0	0	0	0	0	63891000	0	0	0
P13984	GTF2F2	2	0	0	0	0	2	0	2	0	0	0	0	0	0	0	25342000	0	0	0	0	0	0	0	0	0	0	0	0	0	0
P13987	CD59	5	3	4	2	2	4	1	4	4	1	4	0	4	2	0	896790000	159420000	631290000	304810000	262540000	813180000	0	296880000	323960000	0	1366000000	0	298140000	138820000	0
P13995	MTHFD2	2	0	1	0	0	3	0	2	1	0	1	0	1	0	0	0	0	0	0	0	0	0	0	0	0	0	0	0	0	0
P14209	CD99	0	0	2	0	0	0	0	0	0	0	0	0	0	0	0	0	0	16611000	0	0	0	0	0	0	0	0	0	0	0	0
P14314	PRKCSH	11	5	15	3	3	12	3	8	9	1	11	2	8	4	2	428990000	195730000	861150000	76040000	118480000	582760000	45548000	225070000	329030000	0	605530000	58476000	254860000	83387000	0
P14324	FDPS	3	0	5	0	3	5	0	2	1	0	2	3	1	0	0	66731000	0	41168000	0	30533000	52924000	0	0	0	0	77135000	78752000	0	0	0
P14406	COX7A2	2	0	2	0	0	2	0	0	0	0	2	0	0	0	0	49642000	0	33080000	0	0	0	0	0	0	0	221790000	0	0	0	0
P14543	NID1	0	0	0	2	0	0	0	1	0	0	0	0	2	0	0	0	0	0	26959000	0	0	0	0	0	0	0	0	0	0	0
P14550	AKR1A1	2	1	2	0	0	1	0	1	0	0	0	3	0	0	0	9422700	0	0	0	0	0	0	0	0	0	0	0	0	0	0
P14649	MYL6B	2	1	2	1	1	1	0	1	1	0	1	2	2	1	0	0	0	0	0	0	0	0	0	0	0	0	0	0	0	0
P14735	IDE	0	7	7	5	4	0	6	1	2	2	0	21	0	2	0	0	99076000	49703000	104230000	64101000	0	118750000	0	28504000	35429000	0	1143200000	0	0	0
P14854	COX6B1	1	0	0	0	0	3	0	0	0	0	2	0	0	0	0	0	0	0	0	0	86739000	0	0	0	0	83898000	0	0	0	0
P14927	UQCRB	4	0	4	0	0	6	0	3	3	0	4	1	4	0	0	60004000	0	34626000	0	0	88440000	0	46168000	50320000	0	124070000	0	56998000	0	0
P15090	FABP4	0	0	1	0	0	0	0	0	0	0	0	0	1	0	0	0	0	0	0	0	0	0	0	0	0	0	0	0	0	0
P15104	GLUL	1	3	4	0	2	0	7	2	3	2	0	7	0	0	0	0	85147000	77940000	0	63695000	0	263120000	0	48303000	86541000	0	687820000	0	0	0
P15144	ANPEP	17	0	13	0	1	20	1	8	11	0	13	0	5	2	0	246850000	0	258090000	0	0	450660000	0	131470000	158140000	0	346350000	0	85185000	34923000	0
P15153	RAC2	6	4	6	2	3	7	3	6	4	3	6	4	4	4	2	50409000	0	0	0	0	64856000	0	67447000	72533000	0	62947000	0	0	0	0
P15170	GSPT1	10	0	7	0	0	11	3	9	7	3	4	1	3	1	0	150080000	0	117120000	0	0	224930000	69955000	253290000	176450000	91155000	90798000	0	58913000	0	0
P15309	ACPP	0	0	0	1	0	0	0	0	0	0	0	4	0	0	0	0	0	0	0	0	0	0	0	0	0	0	78973000	0	0	0
P15311	EZR	19	7	19	2	8	17	10	17	16	9	10	16	12	7	5	426300000	0	443880000	0	57173000	387100000	71677000	233120000	312510000	55948000	107420000	377590000	97670000	0	0
P15407	FOSL1	0	0	2	0	0	1	0	1	0	0	0	0	0	0	0	0	0	8517600	0	0	0	0	0	0	0	0	0	0	0	0
P15428	HPGD	7	1	7	0	1	8	1	5	4	1	6	5	4	0	1	133990000	0	99962000	0	0	158690000	0	103900000	136620000	0	179050000	261770000	146010000	0	0
P15531	NME1	8	5	10	3	7	9	4	8	9	3	8	8	8	6	4	390680000	138620000	207350000	0	165080000	249580000	0	220530000	251720000	0	278170000	200670000	166340000	144310000	0
P15559	NQO1	1	0	2	0	0	2	0	0	0	0	0	0	0	0	0	0	0	24055000	0	0	27332000	0	0	0	0	0	0	0	0	0
P15586	GNS	4	0	3	1	0	5	0	2	2	0	4	0	1	0	0	0	0	46082000	0	0	88913000	0	40201000	42470000	0	171330000	0	0	0	0
P15927	RPA2	3	0	3	0	0	3	1	2	2	2	1	0	0	0	0	50291000	0	29646000	0	0	35645000	0	52063000	40770000	38684000	0	0	0	0	0
P16050	ALOX15	0	2	0	0	0	0	0	0	0	0	0	0	0	0	0	0	11190000	0	0	0	0	0	0	0	0	0	0	0	0	0
P16070	CD44	7	3	7	1	3	4	2	2	3	2	3	1	2	2	1	549320000	82291000	361790000	0	83962000	580410000	89916000	172270000	200640000	70601000	650400000	0	155910000	77275000	0
P16104;Q96QV6	H2AFX;HIST1H2AA	5	4	5	4	4	5	5	5	4	4	4	4	5	5	5	0	0	0	0	0	0	0	0	0	0	0	0	0	0	0
P16144	ITGB4	25	2	27	0	3	18	1	11	13	0	7	0	12	1	1	527740000	18256000	456020000	0	47040000	234040000	0	171130000	132650000	0	155700000	0	205100000	0	0
P16219	ACADS	4	0	3	0	0	2	0	2	2	0	3	0	3	0	0	29311000	0	34430000	0	0	28067000	0	20898000	18050000	0	53372000	0	31832000	0	0
P16260	SLC25A16	0	0	0	0	0	1	0	5	3	0	0	0	1	0	0	0	0	0	0	0	0	0	8551400	10301000	0	0	0	0	0	0
P16278	GLB1	6	0	3	0	0	8	0	3	3	0	6	0	1	0	0	48869000	0	41408000	0	0	44627000	0	28246000	38801000	0	90509000	0	0	0	0
P16298	PPP3CB	1	0	4	0	0	0	1	0	1	0	0	1	1	1	0	0	0	0	0	0	0	0	0	0	0	0	0	0	0	0
P16435	POR	14	1	8	0	1	15	1	3	5	0	8	6	4	2	0	181110000	0	77547000	0	0	186800000	0	61159000	86675000	0	106310000	109260000	69937000	34390000	0
P16930	FAH	0	0	1	0	0	0	0	1	1	0	0	0	0	0	0	0	0	0	0	0	0	0	0	10445000	0	0	0	0	0	0
P16949	STMN1	3	1	3	0	0	3	0	2	1	0	2	0	2	1	0	43211000	0	44634000	0	0	44656000	0	41591000	0	0	37138000	0	37211000	0	0
P16989	YBX3	4	3	6	2	4	6	2	6	4	2	7	3	4	4	3	0	0	0	0	0	0	0	0	0	0	2926000	0	0	0	0
P17066;P48741	HSPA6	9	5	10	4	8	9	6	8	9	6	7	10	8	4	4	448690000	0	0	0	0	0	0	0	0	0	0	0	0	0	0
P17152	TMEM11	1	0	1	0	0	1	0	1	1	0	0	1	1	0	0	0	0	0	0	0	0	0	16534000	0	0	0	0	0	0	0
P17174	GOT1	1	2	3	0	2	2	1	1	1	0	0	5	0	2	0	0	0	22255000	0	0	0	0	0	0	0	0	47966000	0	0	0
P17252	PRKCA	0	0	1	0	0	2	0	0	0	0	0	0	0	0	0	0	0	0	0	0	8273300	0	0	0	0	0	0	0	0	0
P17301	ITGA2	11	0	11	0	2	18	0	8	6	0	10	0	7	1	0	224650000	0	184900000	0	16673000	379950000	0	174970000	87915000	0	322510000	0	130580000	0	0
P17612	PRKACA	8	0	4	0	1	8	2	5	3	2	3	1	2	2	1	260880000	0	45591000	0	0	175160000	40381000	95533000	101250000	27583000	88117000	0	75387000	44382000	0
P17655	CAPN2	16	3	15	2	4	14	3	8	10	3	5	1	7	4	0	372650000	102600000	333790000	51702000	98733000	259410000	132540000	212210000	252520000	40148000	98435000	0	212730000	124390000	0
P17661	DES	5	5	6	4	5	5	4	5	6	5	4	5	6	5	5	0	0	0	0	0	0	0	0	0	0	0	0	0	0	0
P17706	PTPN2	1	0	1	0	0	1	0	1	1	0	0	0	0	0	0	0	0	43123000	0	0	0	0	0	0	0	0	0	0	0	0
P17812	CTPS1	5	0	4	0	0	8	0	5	5	0	1	0	0	0	0	26847000	0	32967000	0	0	45775000	0	31130000	35792000	0	0	0	0	0	0
P17858	PFKL	11	3	11	1	3	12	2	8	5	0	6	3	4	1	0	345420000	76097000	240390000	0	76994000	227720000	0	133920000	119790000	0	201890000	73553000	54250000	0	0
P17900	GM2A	0	0	3	2	0	3	1	2	2	1	0	5	1	1	1	0	0	37146000	75923000	0	24247000	0	24454000	43688000	0	0	198100000	0	0	0
P17980	PSMC3	11	0	11	0	1	8	1	9	8	1	3	6	6	1	0	288200000	0	329550000	0	0	184960000	0	113690000	126740000	0	49108000	101910000	78006000	0	0
P17987	TCP1	21	2	18	0	6	21	8	18	17	9	10	10	13	6	0	1025600000	56771000	783950000	0	149040000	1004100000	376130000	807760000	952410000	251870000	438370000	373650000	435440000	159500000	0
P18031	PTPN1	7	0	4	0	1	4	0	4	3	2	4	0	6	2	0	66497000	0	56660000	0	0	72252000	0	61804000	72479000	0	76654000	0	65152000	41046000	0
P18085	ARF4	9	2	8	2	4	10	5	7	8	5	6	5	5	6	5	169450000	0	163510000	0	109420000	212650000	174370000	200850000	247030000	122610000	118540000	147220000	0	143090000	0
P18510	IL1RN	0	2	2	0	1	0	3	0	1	0	0	4	0	0	0	0	70876000	31627000	0	0	0	131940000	0	0	0	0	444090000	0	0	0
P18615	NELFE	0	0	0	0	0	0	0	0	0	0	0	0	0	0	0	0	0	0	0	0	0	0	0	0	0	0	0	0	0	0
P18827	SDC1	2	0	0	0	0	3	0	1	1	0	4	0	0	0	0	19659000	0	0	0	0	84719000	0	0	0	0	136330000	0	0	0	0
P18859	ATP5J	0	0	0	0	0	1	0	0	0	0	1	0	0	0	0	0	0	0	0	0	0	0	0	0	0	0	0	0	0	0
P18887	XRCC1	0	0	0	0	0	0	0	2	1	0	0	0	1	1	0	0	0	0	0	0	0	0	15503000	0	0	0	0	0	0	0
P19022	CDH2	2	0	0	0	0	3	0	1	2	0	1	0	0	0	0	0	0	0	0	0	0	0	0	30243000	0	0	0	0	0	0
P19174	PLCG1	5	0	4	1	0	4	0	2	3	0	1	0	2	0	0	38354000	0	37511000	0	0	28386000	0	35704000	21727000	0	0	0	0	0	0
P19387	POLR2C	0	0	0	0	0	3	0	0	0	0	0	0	0	0	0	0	0	0	0	0	14215000	0	0	0	0	0	0	0	0	0
P19388	POLR2E	1	0	3	0	0	1	0	2	1	0	0	0	1	0	0	0	0	0	0	0	0	0	0	0	0	0	0	9853600	0	0
P19404	NDUFV2	1	0	1	0	0	3	1	2	1	0	2	0	1	0	0	0	0	0	0	0	58169000	0	0	0	0	81422000	0	0	0	0
P19474	TRIM21	3	0	4	0	0	1	0	0	0	0	1	0	1	0	0	62002000	0	55985000	0	0	0	0	0	0	0	0	0	0	0	0
P19623	SRM	4	0	4	0	0	4	0	3	1	1	2	1	1	0	0	56582000	0	45453000	0	0	59879000	0	39136000	0	0	54370000	0	0	0	0
P19784	CSNK2A2	2	0	0	0	0	1	0	0	0	0	0	0	0	0	0	12768000	0	0	0	0	0	0	0	0	0	0	0	0	0	0
P19838	NFKB1	1	0	1	0	0	1	0	1	0	0	0	0	0	0	0	0	0	0	0	0	16163000	0	0	0	0	0	0	0	0	0
P19957	PI3	0	0	0	2	0	0	1	0	0	0	0	2	0	0	0	0	0	0	0	0	0	27561000	0	0	0	0	0	0	0	0
P19971	TYMP	0	0	2	0	1	0	4	0	0	0	0	9	0	0	0	0	0	0	0	0	0	55949000	0	0	0	0	183750000	0	0	0
P20020;Q16720;Q01814	ATP2B1	7	0	7	0	0	6	0	6	7	0	6	0	5	0	0	60095000	0	72706000	0	0	48577000	0	50725000	51538000	0	69334000	0	55788000	0	0
P20160	AZU1	0	3	0	0	0	0	0	0	0	0	0	0	0	0	0	0	277430000	0	0	0	0	0	0	0	0	0	0	0	0	0
P20290	BTF3	2	0	0	0	0	2	1	2	1	1	1	1	1	1	0	161810000	0	0	0	0	142620000	0	67939000	0	0	0	0	0	0	0
P20336	RAB3A	1	1	2	0	2	2	1	3	3	2	0	0	2	0	0	0	0	0	0	0	0	0	0	31583000	0	0	0	0	0	0
P20338	RAB4A	1	0	0	0	0	0	0	0	0	0	0	0	0	0	0	0	0	0	0	0	0	0	0	0	0	0	0	0	0	0
P20339	RAB5A	6	2	4	1	2	6	3	7	4	2	4	6	6	2	2	88169000	0	0	0	0	63775000	0	63142000	67732000	0	0	183830000	72011000	0	0
P20591	MX1	35	9	32	0	14	7	0	4	3	0	9	7	7	2	1	4236100000	250400000	3675400000	0	726910000	74307000	0	26001000	23190000	0	180320000	148890000	149780000	24463000	0
P20592	MX2	9	2	9	0	4	2	0	2	2	0	2	2	2	1	0	124010000	0	116560000	0	0	0	0	0	0	0	0	0	0	0	0
P20645	M6PR	1	0	1	0	1	2	0	0	0	0	1	0	1	0	0	0	0	0	0	0	56096000	0	0	0	0	0	0	0	0	0
P20648	ATP4A	2	0	3	1	0	2	0	2	1	0	1	2	2	0	0	0	0	0	0	0	0	0	0	0	0	0	72557000	0	0	0
P20674	COX5A	2	1	4	0	1	5	0	2	0	0	2	3	2	0	0	46950000	0	69122000	0	0	126410000	0	68889000	0	0	0	84635000	107290000	0	0
P20810	CAST	4	1	7	0	1	4	1	5	4	1	2	3	5	1	0	67676000	0	56525000	0	0	40261000	0	61758000	50934000	0	0	73930000	58944000	0	0
P20839	IMPDH1	2	0	2	0	1	4	0	1	0	0	0	1	1	0	0	7766800	0	0	0	0	17613000	0	0	0	0	0	0	0	0	0
P20908	COL5A1	0	1	3	0	2	0	3	1	2	4	0	0	1	1	1	0	0	32359000	0	0	0	56623000	0	50537000	82306000	0	0	0	0	0
P21128	ENDOU	0	0	0	0	0	0	0	0	0	0	0	8	0	0	0	0	0	0	0	0	0	0	0	0	0	0	1161100000	0	0	0
P21266;P46439	GSTM3	0	0	0	0	0	4	0	0	0	0	0	2	0	0	0	0	0	0	0	0	66958000	0	0	0	0	0	0	0	0	0
P21281;P15313	ATP6V1B2	7	1	7	0	2	6	0	4	4	0	5	5	3	0	0	103110000	0	102990000	0	66283000	66372000	0	49981000	0	0	71002000	162510000	51651000	0	0
P21283	ATP6V1C1	4	0	3	0	0	5	0	2	2	0	2	1	2	0	0	47636000	0	27378000	0	0	51135000	0	26198000	25267000	0	0	0	20953000	0	0
P21291	CSRP1	4	0	5	0	1	5	3	4	4	2	5	0	3	3	0	68688000	0	64593000	0	0	156910000	94170000	115420000	120560000	87112000	131860000	0	91519000	93873000	0
P21359	NF1	1	0	0	0	0	2	0	0	0	0	0	0	1	0	0	0	0	0	0	0	7463400	0	0	0	0	0	0	0	0	0
P21397	MAOA	0	0	0	0	0	0	0	0	0	0	0	1	0	0	0	0	0	0	0	0	0	0	0	0	0	0	6102300	0	0	0
P21399	ACO1	1	0	2	0	0	1	0	1	1	1	0	1	0	1	1	8744200	0	0	0	0	0	0	0	0	0	0	0	0	0	0
P21589	NT5E	13	0	9	0	0	8	0	3	4	0	5	0	4	0	0	271960000	0	180660000	0	0	116610000	0	47391000	46027000	0	109130000	0	92981000	0	0
P21912	SDHB	4	0	2	0	0	4	2	4	4	2	4	2	4	2	1	39065000	0	26698000	0	0	206140000	63814000	111390000	120490000	48960000	264130000	51768000	121130000	58140000	0
P21926	CD9	2	1	3	0	1	3	1	3	3	0	2	1	1	1	0	332890000	0	142560000	0	0	267320000	0	83995000	69144000	0	309720000	72601000	105590000	0	0
P21953	BCKDHB	0	0	1	0	0	0	0	0	0	0	0	0	0	0	0	0	0	0	0	0	0	0	0	0	0	0	0	0	0	0
P21964	COMT	2	0	2	0	1	9	1	1	2	0	2	0	1	0	0	45347000	0	0	0	0	317940000	0	0	29299000	0	39466000	0	0	0	0
P21980	TGM2	5	1	6	0	1	11	4	7	7	1	2	0	4	0	0	101750000	0	60459000	0	0	151140000	51862000	102290000	104250000	34611000	36530000	0	48621000	0	0
P22033	MUT	0	0	0	0	0	2	0	1	0	0	1	0	1	0	0	0	0	0	0	0	0	0	0	0	0	0	0	0	0	0
P22059;Q969R2	OSBP	11	0	7	1	0	9	0	6	4	0	5	1	5	0	0	139190000	0	54495000	0	0	117610000	0	82741000	89107000	0	112020000	0	73563000	0	0
P22061	PCMT1	3	0	4	0	0	1	0	1	2	0	0	1	2	0	0	66771000	0	31568000	0	0	0	0	0	0	0	0	0	24872000	0	0
P22079	LPO	0	0	0	0	0	0	0	0	0	0	0	0	0	0	0	0	0	0	0	0	0	0	0	0	0	0	0	0	0	0
P22102	GART	14	2	17	0	4	22	4	11	10	6	4	4	8	4	1	387380000	0	252580000	0	57257000	404090000	56918000	165370000	159300000	69064000	95532000	59019000	98622000	56333000	0
P22105;Q16473	TNXB	0	0	0	3	0	0	0	1	0	0	0	0	4	0	0	0	0	0	0	0	0	0	0	0	0	0	0	40483000	0	0
P22307	SCP2	7	0	8	0	0	9	0	5	5	0	4	1	3	1	0	221460000	0	114670000	0	0	259990000	0	127570000	121860000	0	251470000	0	98388000	0	0
P22531	SPRR2E	0	5	5	4	5	0	5	3	4	4	0	4	2	2	2	0	155770000	91491000	133510000	190070000	0	142850000	0	0	0	0	146000000	0	84514000	0
P22570	FDXR	7	0	8	0	0	6	0	6	5	0	5	3	6	1	0	88656000	0	96678000	0	0	76564000	0	47006000	40758000	0	132190000	59412000	57368000	0	0
P22612	PRKACG	1	0	0	0	0	2	0	2	1	0	0	0	1	0	0	0	0	0	0	0	0	0	14030000	0	0	0	0	0	0	0
P23193	TCEA1	0	0	1	0	0	0	0	0	0	0	0	0	0	0	0	0	0	0	0	0	0	0	0	0	0	0	0	0	0	0
P23219;P35354	PTGS1;PTGS2	0	0	0	0	0	0	0	0	0	0	0	2	0	1	0	0	0	0	0	0	0	0	0	0	0	0	61369000	0	0	0
P23229	ITGA6	25	2	25	6	9	26	3	25	24	1	20	0	24	9	1	655790000	36667000	699620000	176390000	180040000	1026100000	35385000	557790000	510650000	0	958680000	0	712220000	134890000	0
P23258;Q9NRH3	TUBG1;TUBG2	4	0	2	0	0	8	0	1	0	0	2	0	1	0	0	45694000	0	0	0	0	65546000	0	0	0	0	0	0	0	0	0
P23368;Q16798	ME2	4	0	3	0	1	3	0	1	1	0	3	0	1	0	0	22742000	0	36158000	0	0	23345000	0	0	0	0	37840000	0	0	0	0
P23381	WARS	9	0	7	0	1	7	0	5	2	1	2	1	2	1	0	216450000	0	175330000	0	0	98131000	0	43940000	51638000	0	43414000	0	33856000	0	0
P23497	SP100	5	0	9	0	0	1	0	2	0	0	1	0	0	0	0	57669000	0	121860000	0	0	0	0	26699000	0	0	0	0	0	0	0
P23588	EIF4B	3	1	7	1	2	6	2	7	5	2	3	1	4	1	1	65945000	0	79505000	0	115830000	135910000	70915000	174380000	161220000	189560000	131080000	0	134960000	0	0
P23634	ATP2B4	5	0	3	0	0	1	0	4	4	0	3	0	3	0	0	0	0	0	0	0	0	0	0	0	0	0	0	0	0	0
P23743	DGKA	1	0	1	0	0	1	1	3	2	1	0	2	2	1	0	0	0	0	0	0	0	0	28782000	0	0	0	50383000	0	0	0
P23786	CPT2	1	0	4	0	0	7	0	3	1	0	3	0	3	0	0	0	0	27145000	0	0	50581000	0	26060000	0	0	67489000	0	41124000	0	0
P23919	DTYMK	11	1	6	0	1	9	0	5	5	1	7	0	3	1	0	142280000	0	88972000	0	0	138880000	0	91800000	97225000	0	170250000	0	125590000	0	0
P23921	RRM1	3	0	2	0	0	6	0	5	3	0	1	1	0	0	0	34677000	0	24095000	0	0	58416000	0	35396000	37343000	0	0	0	0	0	0
P24158	PRTN3	0	2	0	0	0	0	0	1	0	0	0	0	0	0	0	0	24149000	0	0	0	0	0	0	0	0	0	0	0	0	0
P24390	KDELR1	1	0	0	1	0	2	1	2	2	1	0	1	2	0	0	0	0	0	115020000	0	0	0	18095000	24877000	0	0	0	0	0	0
P24468;P10589	NR2F2;NR2F1	1	0	0	0	0	3	0	1	1	0	0	0	0	0	0	0	0	0	0	0	0	0	0	0	0	0	0	0	0	0
P24539	ATP5F1	8	0	9	1	3	8	1	4	5	0	5	3	6	1	1	202820000	0	165510000	0	101460000	191790000	0	135830000	141110000	0	370210000	139370000	162500000	0	0
P24557	TBXAS1	4	0	4	0	0	8	0	3	4	0	5	0	3	2	1	62119000	0	48001000	0	0	63778000	0	49452000	51199000	0	151820000	0	77686000	0	0
P24666	ACP1	2	0	4	1	1	7	1	5	4	1	2	2	1	2	1	43698000	0	55513000	0	0	102510000	0	69583000	90430000	0	99558000	92797000	0	78607000	0
P24844	MYL9	5	2	5	1	1	5	1	3	2	0	1	4	3	2	0	0	0	0	0	0	0	0	0	0	0	0	0	0	0	0
P24928	POLR2A	2	0	0	0	0	1	0	3	3	0	1	0	1	0	0	17381000	0	0	0	0	0	0	0	0	0	0	0	0	0	0
P35626;P25098	ADRBK2;ADRBK1	0	0	1	0	0	0	0	0	0	1	0	0	0	0	0	0	0	3009000	0	0	0	0	0	0	0	0	0	0	0	0
P25205	MCM3	11	0	11	0	2	19	6	20	13	5	3	0	9	1	0	205450000	0	185670000	0	20905000	332060000	90940000	398110000	278600000	117430000	60318000	0	125740000	0	0
P25685	DNAJB1	10	0	11	1	4	6	5	12	12	4	6	5	9	4	1	294700000	0	273850000	0	131620000	235540000	149190000	237670000	221050000	128200000	208730000	168810000	184020000	104000000	0
P25787	PSMA2	6	4	5	0	4	8	0	6	6	4	1	7	3	1	1	192300000	215240000	194780000	0	183850000	210310000	0	102020000	104530000	97061000	0	194520000	65447000	0	0
P25788	PSMA3	5	5	4	2	4	6	3	5	4	2	4	3	2	2	1	127100000	123020000	128570000	146880000	122480000	206570000	131820000	108260000	133530000	118450000	227810000	183960000	95402000	119330000	0
P25815	S100P	0	1	1	0	0	0	0	0	0	0	0	1	0	0	0	0	0	0	0	0	0	0	0	0	0	0	25506000	0	0	0
P26006	ITGA3	13	5	18	1	6	12	3	11	8	3	9	0	7	4	1	720120000	143160000	633270000	0	196970000	503040000	148540000	311310000	381900000	114420000	442380000	0	250570000	125430000	0
P26232	CTNNA2	0	0	0	0	0	0	0	0	0	0	0	1	0	0	0	0	0	0	0	0	0	0	0	0	0	0	21840000	0	0	0
P26358	DNMT1	6	0	3	0	2	6	2	21	13	5	0	0	3	3	1	39680000	0	15039000	0	15021000	33638000	35687000	344590000	168630000	99002000	0	0	52104000	42819000	0
P26378;Q12926	ELAVL4;ELAVL2	2	0	2	0	1	1	0	0	0	0	1	0	0	0	0	0	0	0	0	0	0	0	0	0	0	0	0	0	0	0
P26440	IVD	9	0	8	1	0	4	0	3	1	0	2	0	3	1	1	163910000	0	172210000	0	0	138880000	0	65671000	0	0	124510000	0	117770000	0	0
P26583	HMGB2	4	0	6	0	1	6	3	5	6	4	3	3	4	3	2	93693000	0	39237000	0	0	78028000	111820000	135270000	124160000	167270000	115940000	0	0	0	0
P26639;A2RTX5	TARS	6	1	7	0	1	8	1	4	3	1	1	4	2	0	0	58098000	0	62068000	0	0	40387000	0	45248000	45856000	0	0	59168000	29423000	0	0
P26885	FKBP2	2	0	2	1	0	4	0	2	1	1	2	1	2	1	1	91205000	0	56294000	0	0	0	0	0	0	0	136410000	0	0	0	0
P27105	STOM	0	1	1	0	0	0	0	0	0	0	0	0	0	0	0	0	0	0	0	0	0	0	0	0	0	0	0	0	0	0
P27144	AK4	5	1	4	0	2	3	0	2	1	0	3	1	3	0	0	63497000	0	53264000	0	46526000	63035000	0	47267000	0	0	102340000	0	59847000	0	0
P27449	ATP6V0C	1	0	1	0	0	0	0	0	0	0	0	0	0	0	0	0	0	17537000	0	0	0	0	0	0	0	0	0	0	0	0
P27482	CALML3	0	1	1	3	1	0	1	0	1	0	0	7	0	0	0	0	0	0	216090000	0	0	0	0	0	0	0	1133500000	0	0	0
P27487	DPP4	0	0	10	0	0	2	0	5	7	0	1	0	5	2	0	0	0	86194000	0	0	23981000	0	40817000	63139000	0	0	0	71436000	0	0
P27635;Q96L21	RPL10	7	3	10	1	6	9	3	10	8	1	4	5	9	4	3	602640000	134610000	689370000	0	228980000	424950000	188320000	477400000	437710000	146560000	224850000	341430000	416190000	231820000	0
P27708	CAD	37	4	24	0	4	47	2	43	32	5	16	2	21	4	1	872940000	42689000	610970000	0	44905000	1061700000	30403000	787160000	633400000	38216000	319080000	21782000	450530000	49194000	0
P28062	PSMB8	2	0	3	0	2	2	0	1	0	0	0	3	0	0	0	23317000	0	17894000	0	39887000	12498000	0	0	0	0	0	0	0	0	0
P28065	PSMB9	0	0	1	0	0	0	0	0	0	0	0	1	0	0	0	0	0	0	0	0	0	0	0	0	0	0	5138100	0	0	0
P28072	PSMB6	1	2	3	1	2	4	2	3	2	1	0	3	3	1	1	0	257010000	115120000	0	155780000	38682000	116210000	70363000	78014000	0	0	135690000	59726000	0	0
P28288	ABCD3	5	0	4	0	0	6	0	6	4	0	2	2	1	0	0	56284000	0	44741000	0	0	42680000	0	34021000	35773000	0	66978000	0	0	0	0
P28340	POLD1	2	0	3	0	0	7	0	6	3	0	0	0	0	0	0	0	0	20638000	0	0	0	0	30470000	24511000	0	0	0	0	0	0
P28370	SMARCA1	8	0	8	1	1	7	4	12	5	3	6	2	9	1	0	28965000	0	41098000	0	0	45478000	0	57939000	0	0	0	0	43545000	0	0
P28482	MAPK1	7	0	5	0	0	5	0	3	2	0	3	0	1	1	0	111220000	0	61230000	0	0	66581000	0	49509000	50811000	0	57097000	0	0	0	0
P28799	GRN	2	1	3	2	0	4	0	1	0	0	3	0	0	0	0	40375000	0	55467000	0	0	39057000	0	0	0	0	64651000	0	0	0	0
P29144	TPP2	1	0	2	0	0	0	0	0	0	0	0	0	0	0	0	0	0	14796000	0	0	0	0	0	0	0	0	0	0	0	0
P29218	IMPA1	3	0	1	0	1	3	1	3	2	1	2	0	0	1	0	34565000	0	0	0	0	31666000	0	29208000	0	0	36987000	0	0	0	0
P29372	MPG	1	0	0	0	0	0	3	2	2	2	0	0	2	1	1	0	0	0	0	0	0	35775000	32637000	23830000	37339000	0	0	25658000	0	0
P29558;Q6XE24	RBMS1	2	0	1	0	1	1	0	1	1	0	1	0	2	0	1	0	0	0	0	0	0	0	0	0	0	0	0	33924000	0	0
P29590	PML	8	0	12	0	3	4	0	5	2	0	3	0	3	1	0	73895000	0	116780000	0	27169000	38745000	0	46956000	55949000	0	50198000	0	36222000	0	0
P29728	OAS2	22	1	18	0	3	1	0	0	0	0	3	0	2	0	0	1022800000	0	808190000	0	48659000	0	0	0	0	0	58495000	0	28914000	0	0
P29762	CRABP1	0	0	1	1	0	1	1	1	1	0	1	1	0	0	0	0	0	0	0	0	0	0	0	0	0	0	0	0	0	0
P29803	PDHA2	1	0	3	0	0	2	1	1	0	0	0	0	1	1	0	0	0	0	0	0	0	0	0	0	0	0	0	0	0	0
P29966	MARCKS	3	0	5	0	3	4	1	3	2	1	3	1	2	2	0	59549000	0	68805000	0	38859000	89518000	0	92131000	88812000	0	97613000	0	75122000	55645000	0
P29992;O95837;P50148	GNA11	3	0	2	0	2	7	0	4	1	0	3	0	2	0	0	65479000	0	29624000	0	16642000	99803000	0	21848000	0	0	61237000	0	20694000	0	0
P30038	ALDH4A1	3	0	7	0	0	2	0	1	1	0	3	2	1	0	0	26750000	0	70807000	0	0	30024000	0	0	0	0	42998000	58545000	0	0	0
P30040	ERP29	11	1	6	1	2	6	1	7	5	1	5	2	6	2	0	512170000	0	296200000	0	87586000	313920000	0	184250000	166980000	0	322280000	0	177290000	48278000	0
P30042	C21orf33	9	3	7	1	4	7	1	7	6	1	4	1	7	3	1	354530000	151800000	253250000	0	130540000	202680000	0	188750000	193870000	0	202970000	0	194120000	109650000	0
P30043	BLVRB	1	0	1	0	0	1	0	2	1	0	0	2	0	0	0	0	0	0	0	0	0	0	0	0	0	0	132090000	0	0	0
P30049	ATP5D	0	1	0	1	0	0	0	0	0	0	0	1	0	0	0	0	0	0	0	0	0	0	0	0	0	0	0	0	0	0
P30085	CMPK1	3	1	2	0	1	4	2	4	3	1	3	4	1	1	0	79238000	0	33135000	0	0	52263000	0	33050000	34409000	0	49788000	75346000	0	0	0
P30260	CDC27	1	0	0	0	0	4	0	1	1	0	0	0	0	0	0	0	0	0	0	0	29043000	0	0	0	0	0	0	0	0	0
P30405	PPIF	4	1	5	1	2	4	1	5	3	1	2	2	4	1	0	97623000	0	93726000	0	0	152760000	0	82936000	94636000	0	89457000	0	77648000	0	0
P30408	TM4SF1	0	1	1	0	1	0	0	1	1	0	0	0	0	0	0	0	0	0	0	0	0	0	0	0	0	0	0	0	0	0
P30414	NKTR	0	0	0	0	0	0	0	2	0	1	0	0	0	0	0	0	0	0	0	0	0	0	10059000	0	0	0	0	0	0	0
P30455;P30443	HLA-A	7	2	10	1	3	4	0	3	3	1	4	1	3	1	0	0	0	0	0	0	0	0	0	0	0	0	0	0	0	0
Q29940;P30493;P30495	HLA-B	6	2	9	1	4	4	0	1	1	1	3	2	2	1	0	0	0	0	0	0	0	0	0	0	0	0	0	0	0	0
P30499	HLA-C	8	0	11	0	1	4	0	1	1	0	3	3	3	0	0	8940700	0	0	0	0	0	0	0	0	0	0	0	0	0	0
P30501	HLA-C	7	2	7	1	3	3	0	0	1	0	4	2	3	0	0	0	0	0	0	0	0	0	0	0	0	0	0	0	0	0
P30519	HMOX2	2	0	1	0	0	2	0	0	0	0	0	1	1	0	0	0	0	0	0	0	31414000	0	0	0	0	0	0	0	0	0
P30520;Q8N142	ADSS	3	0	5	0	0	9	0	5	2	0	2	0	2	0	0	23372000	0	42064000	0	0	91317000	0	29860000	32124000	0	0	0	0	0	0
P30533	LRPAP1	3	0	5	0	0	4	0	0	0	0	2	0	1	0	0	0	0	29955000	0	0	41200000	0	0	0	0	55024000	0	0	0	0
P30536	TSPO	1	1	2	0	1	2	0	2	1	1	1	2	2	1	1	0	0	89989000	0	0	0	0	82503000	0	0	0	95287000	107010000	0	0
P30550	GRPR	1	0	0	0	0	2	0	0	0	0	1	0	0	0	0	0	0	0	0	0	64709000	0	0	0	0	0	0	0	0	0
P30566	ADSL	3	0	4	0	0	5	0	3	3	0	1	0	1	0	0	44340000	0	32180000	0	0	59403000	0	25894000	29160000	0	0	0	0	0	0
P30622	CLIP1	3	0	1	0	0	1	0	2	1	0	0	8	0	0	0	0	0	0	0	0	0	0	0	0	0	0	129150000	0	0	0
P30626	SRI	3	1	6	0	0	3	1	2	2	0	3	0	0	0	0	59487000	0	55641000	0	0	91592000	0	57658000	63800000	0	115720000	0	0	0	0
P30711	GSTT1	1	0	0	0	0	0	0	0	0	0	0	0	0	0	0	0	0	0	0	0	0	0	0	0	0	0	0	0	0	0
P30740	SERPINB1	0	2	1	0	1	1	1	1	1	1	0	0	0	0	0	0	0	0	0	0	0	0	0	0	0	0	0	0	0	0
P30837	ALDH1B1	5	0	5	0	0	6	1	2	3	0	1	0	3	1	0	83439000	0	49480000	0	0	0	0	0	0	0	0	0	0	0	0
P30838	ALDH3A1	1	8	1	0	2	1	2	1	1	1	1	6	1	1	1	0	279510000	0	0	0	0	0	0	0	0	0	501760000	0	0	0
P30876	POLR2B	5	0	8	0	0	4	2	14	5	6	0	0	8	2	0	46844000	0	50966000	0	0	49275000	43954000	108630000	64516000	65137000	0	0	75338000	0	0
P30989	NTSR1	0	0	0	0	0	2	0	1	0	0	0	0	1	0	0	0	0	0	0	0	12443000	0	0	0	0	0	0	0	0	0
P31146	CORO1A	0	2	2	0	1	0	0	1	1	0	0	0	0	0	0	0	0	4763900	0	0	0	0	0	0	0	0	0	0	0	0
P31150	GDI1	12	3	14	0	3	8	3	9	6	2	3	8	3	4	3	65384000	0	69516000	0	0	45503000	0	26453000	0	0	0	0	0	0	0
P31153;Q00266	MAT2A	6	1	4	1	1	5	1	3	2	0	3	2	2	2	0	99683000	0	74435000	0	0	78533000	0	42800000	43394000	0	86153000	61470000	0	29686000	0
P31327	CPS1	0	0	0	0	0	0	0	0	1	0	0	0	0	0	0	0	0	0	0	0	0	0	0	0	0	0	0	0	0	0
P31350	RRM2	1	0	1	0	0	3	0	0	0	0	0	0	0	0	0	0	0	0	0	0	17534000	0	0	0	0	0	0	0	0	0
P31483	TIA1	3	1	5	0	2	4	2	6	3	5	2	0	4	2	2	56632000	0	81011000	0	53290000	68890000	48720000	61272000	46006000	65018000	58427000	0	42419000	0	0
P31689	DNAJA1	5	1	4	0	1	5	2	5	3	1	2	3	3	3	1	150790000	0	181550000	0	0	289580000	65374000	130290000	98222000	0	133440000	97866000	94438000	68599000	0
P31937	HIBADH	5	0	5	1	0	5	0	2	1	0	3	1	2	1	0	75953000	0	83077000	0	0	67635000	0	42218000	0	0	60866000	0	66036000	0	0
P31939	ATIC	12	0	11	0	0	18	0	9	7	0	3	2	6	2	0	195240000	0	135310000	0	0	218470000	0	90386000	107900000	0	43366000	27012000	67556000	41871000	0
P31949	S100A11	3	2	2	1	1	3	4	3	3	0	0	5	1	0	0	116110000	248690000	127470000	0	0	96006000	215540000	65014000	74080000	0	0	486740000	0	0	0
P32189;Q14409	GK;GK3P	1	0	1	0	0	0	0	0	0	0	0	0	0	0	0	0	0	0	0	0	0	0	0	0	0	0	0	0	0	0
P32320	CDA	0	3	1	0	1	0	1	1	1	0	0	0	0	0	0	0	48235000	0	0	0	0	0	0	0	0	0	0	0	0	0
P32322	PYCR1	6	3	6	0	1	4	1	5	5	1	4	0	5	3	2	126060000	32007000	94134000	0	0	89891000	0	64022000	51832000	0	78905000	0	92869000	65356000	0
P32456;P32455	GBP2;GBP1	1	0	0	0	0	0	0	0	0	0	0	2	0	0	0	0	0	0	0	0	0	0	0	0	0	0	48754000	0	0	0
P32926	DSG3	0	0	0	0	1	0	1	0	0	0	0	2	0	0	0	0	0	0	0	0	0	0	0	0	0	0	70296000	0	0	0
P33121;Q9ULC5	ACSL1	3	0	3	0	1	1	0	2	1	0	1	3	1	1	0	0	0	18293000	0	0	0	0	0	0	0	0	0	0	0	0
P33176;O60282;Q12840	KIF5B	17	1	15	0	2	17	2	10	8	2	9	4	8	1	0	166180000	0	197370000	0	24898000	165580000	31682000	145630000	148080000	0	114990000	71337000	112470000	0	0
P33316	DUT	0	0	0	0	0	1	0	1	1	0	0	0	1	0	0	0	0	0	0	0	0	0	0	0	0	0	0	0	0	0
P33764	S100A3	0	0	0	0	0	0	0	0	0	2	0	0	0	0	0	0	0	0	0	0	0	0	0	0	48303000	0	0	0	0	0
P33897	ABCD1	0	0	2	0	0	1	0	0	0	0	0	0	0	0	0	0	0	10556000	0	0	0	0	0	0	0	0	0	0	0	0
P33947	KDELR2	0	0	0	1	0	2	1	1	1	1	0	1	1	0	0	0	0	0	0	0	90866000	0	0	0	0	0	0	0	0	0
P33991	MCM4	8	0	8	0	0	16	3	14	11	1	3	0	2	0	0	105140000	0	110280000	0	0	273640000	58112000	178490000	178430000	0	65113000	0	20355000	0	0
P33992	MCM5	8	0	13	0	1	7	7	14	13	6	3	0	6	3	0	123940000	0	212700000	0	0	174050000	158100000	353800000	289480000	182240000	85549000	0	123220000	50015000	0
P33993	MCM7	10	0	11	0	1	16	3	14	12	5	4	0	7	2	0	232270000	0	160530000	0	0	329630000	57443000	273470000	257980000	84574000	76949000	0	94207000	22435000	0
P34096	RNASE4	0	0	0	0	0	0	0	0	0	0	0	0	0	0	0	0	0	0	0	0	0	0	0	0	0	0	0	0	0	0
P34896	SHMT1	1	1	1	0	0	1	0	1	1	1	0	0	1	0	0	0	0	0	0	0	0	0	0	0	0	0	0	0	0	0
P34931	HSPA1L	10	5	11	2	10	9	6	10	10	5	4	10	8	6	4	0	0	0	0	0	0	0	0	0	0	0	0	0	0	0
P35030	PRSS3	0	1	1	1	1	1	1	0	1	1	1	1	1	1	1	0	0	0	0	0	0	0	0	0	0	0	0	426490000	0	0
P35052	GPC1	0	0	0	0	0	1	0	1	0	0	0	0	0	0	0	0	0	0	0	0	0	0	0	0	0	0	0	0	0	0
P35080	PFN2	1	0	1	0	0	1	0	0	0	0	1	0	1	0	0	0	0	0	0	0	42499000	0	0	0	0	0	0	0	0	0
P35221;Q9UI47	CTNNA1	0	0	0	0	0	0	0	0	0	0	0	5	0	0	0	0	0	0	0	0	0	0	0	0	0	0	114900000	0	0	0
P35222	CTNNB1	16	5	14	1	5	12	4	17	16	4	8	9	7	4	5	372610000	0	152820000	0	37195000	280710000	0	117720000	107100000	0	291740000	178120000	60088000	0	0
P35237	SERPINB6	8	0	7	0	1	6	1	4	4	2	3	0	2	0	0	102250000	0	75466000	0	0	100900000	0	48915000	66251000	38685000	78118000	0	0	0	0
P35240	NF2	1	0	2	0	0	1	0	2	1	0	0	0	1	0	0	0	0	13106000	0	0	0	0	8644200	0	0	0	0	0	0	0
P35241	RDX	11	6	14	2	6	12	8	14	14	7	9	8	14	6	5	52507000	0	44771000	0	0	59542000	0	27726000	38144000	0	29981000	0	25052000	0	0
P35244	RPA3	0	0	0	0	0	1	0	0	0	0	1	0	0	0	0	0	0	0	0	0	0	0	0	0	0	0	0	0	0	0
P35249	RFC4	1	0	1	0	0	2	0	1	1	0	1	0	0	0	0	0	0	0	0	0	18493000	0	0	0	0	0	0	0	0	0
P35250	RFC2	1	0	2	0	0	2	0	1	1	0	1	0	0	0	0	0	0	0	0	0	25318000	0	0	0	0	0	0	0	0	0
P35251	RFC1	0	0	1	0	1	1	1	2	1	0	0	0	1	0	1	0	0	0	0	0	0	0	22089000	0	0	0	0	0	0	0
P35269	GTF2F1	1	0	1	0	0	1	0	4	1	0	0	0	0	0	0	0	0	0	0	0	0	0	22221000	0	0	0	0	0	0	0
P35270	SPR	4	0	4	0	1	3	0	2	1	0	2	0	2	0	0	73581000	0	31844000	0	0	28041000	0	18648000	42162000	0	45031000	0	0	0	0
P35321	SPRR1A	0	4	4	3	5	0	3	4	4	3	0	5	2	4	3	0	126340000	0	0	0	0	0	0	0	0	0	115010000	0	0	0
P35326	SPRR2A	0	4	5	4	4	0	5	2	3	3	0	4	1	1	1	0	0	0	0	0	0	0	0	0	0	0	0	0	0	0
P35556	FBN2	0	0	0	0	0	0	0	0	0	0	0	0	2	0	0	0	0	0	0	0	0	0	0	0	0	0	0	0	0	0
P35573	AGL	0	1	2	0	0	1	1	0	0	0	0	1	0	0	0	0	280960000	0	0	0	0	0	0	0	0	0	0	0	0	0
P35580	MYH10	22	6	15	2	8	15	6	13	8	3	11	11	10	4	2	29994000	0	28390000	0	0	0	0	0	0	0	0	0	0	0	0
P35609	ACTN2	14	9	14	3	8	12	7	13	12	7	10	9	12	9	7	0	0	0	0	0	0	0	0	0	0	0	105300000	0	0	0
P35610	SOAT1	1	0	1	0	0	0	0	1	0	0	0	0	0	0	0	0	0	2281500	0	0	0	0	0	0	0	0	0	0	0	0
P35611	ADD1	1	0	1	0	0	3	0	2	3	0	2	0	1	0	0	0	0	0	0	0	0	0	18878000	15264000	0	0	0	0	0	0
P35613	BSG	8	1	8	1	2	7	1	5	5	1	7	0	4	2	1	336230000	0	347470000	0	100590000	376670000	0	202170000	210880000	0	399190000	0	215170000	78646000	0
P35625	TIMP3	0	0	0	0	0	0	0	0	0	0	0	0	0	0	0	0	0	0	0	0	0	0	0	0	0	0	0	0	0	0
P35658	NUP214	2	0	4	0	0	7	0	2	0	0	1	0	1	0	0	17331000	0	0	0	0	23144000	0	0	0	0	0	0	0	0	0
P35749	MYH11	10	6	11	3	5	8	3	8	5	2	5	7	7	3	3	5540800	0	0	0	0	0	0	0	0	0	0	0	0	0	0
P35754	GLRX	0	2	2	1	2	0	2	1	1	2	0	2	0	1	1	0	101480000	44584000	0	89731000	0	69864000	0	0	79417000	0	85688000	0	0	0
P35813;O75688	PPM1A;PPM1B	0	0	2	0	0	0	0	0	0	0	0	0	0	0	0	0	0	5139600	0	0	0	0	0	0	0	0	0	0	0	0
P35914;Q8TB92	HMGCL	3	0	1	0	0	3	0	0	0	0	0	0	0	0	0	0	0	0	0	0	0	0	0	0	0	0	0	0	0	0
P35998	PSMC2	14	1	16	0	5	12	2	11	8	2	7	7	5	0	0	287200000	0	369990000	0	30828000	237860000	56706000	231090000	148510000	21802000	196580000	134360000	88352000	0	0
P36404	ARL2	1	0	0	0	0	1	0	1	1	0	1	0	1	0	0	0	0	0	0	0	0	0	0	0	0	0	0	3974300	0	0
P36406	TRIM23	1	0	0	0	0	1	1	1	1	1	0	1	1	1	0	0	0	0	0	0	0	0	0	0	0	0	49404000	0	0	0
P36507	MAP2K2	1	0	1	0	0	3	0	1	0	0	0	0	0	0	0	0	0	5650000	0	0	0	0	0	0	0	0	0	0	0	0
P36543;Q96A05	ATP6V1E1	3	0	1	0	0	1	0	1	1	0	1	2	1	0	0	0	0	0	0	0	0	0	0	0	0	0	84317000	0	0	0
P36551	CPOX	6	0	6	0	0	7	0	4	3	0	5	0	2	0	0	88055000	0	71538000	0	0	112060000	0	54618000	50645000	0	114130000	0	61523000	0	0
P36871	PGM1	8	0	9	0	0	5	0	2	0	1	1	4	2	0	0	74849000	0	45440000	0	0	43662000	0	30313000	0	0	0	55854000	0	0	0
P36873	PPP1CC	13	2	10	1	6	13	5	10	9	6	6	3	9	7	5	0	0	0	0	0	0	0	21860000	0	0	0	0	0	0	0
P36915	GNL1	3	0	5	0	0	7	1	1	1	0	1	0	0	0	0	23284000	0	18625000	0	0	41481000	0	0	0	0	0	0	0	0	0
P36957	DLST	5	1	7	2	2	5	0	4	6	1	3	4	5	1	0	195980000	0	218450000	67163000	76725000	131190000	0	104530000	89077000	0	193360000	117590000	115420000	0	0
P36969	GPX4	2	0	1	0	0	2	0	1	1	0	1	1	1	0	0	43119000	0	0	0	0	35596000	0	0	0	0	0	0	0	0	0
P37059	HSD17B2	5	0	5	0	0	2	0	0	0	0	3	0	0	0	0	68574000	0	38289000	0	0	30856000	0	0	0	0	55049000	0	0	0	0
P37198	NUP62	0	0	3	0	0	3	0	0	1	0	0	0	0	0	0	0	0	23801000	0	0	21595000	0	0	0	0	0	0	0	0	0
P38432	COIL	1	0	2	0	0	2	0	1	0	0	1	0	0	0	0	0	0	0	0	0	25302000	0	0	0	0	0	0	0	0	0
P38571	LIPA	1	0	1	0	0	2	0	0	0	0	0	0	0	0	0	0	0	0	0	0	21481000	0	0	0	0	0	0	0	0	0
P38606	ATP6V1A	14	2	10	0	4	13	3	9	6	1	6	10	6	0	1	233100000	38509000	193710000	0	52641000	190270000	110710000	118750000	90610000	0	99151000	376310000	124870000	0	0
P39060	COL18A1	0	2	0	7	1	0	0	2	1	1	0	0	8	5	0	0	63967000	0	221550000	0	0	0	43327000	0	0	0	0	196030000	73077000	0
P39687;O95626;O43423	ANP32A	3	0	1	0	0	4	0	0	0	0	2	0	0	0	0	105220000	0	0	0	0	122940000	0	0	0	0	165440000	0	0	0	0
P40121	CAPG	3	1	6	0	0	5	3	3	2	0	0	8	2	0	0	89656000	0	108460000	0	0	38700000	81108000	64030000	46601000	0	0	416010000	0	0	0
P40123	CAP2	1	1	1	1	1	0	1	1	1	1	0	1	1	1	1	0	0	0	0	0	0	0	0	0	0	0	0	0	0	0
P40222	TXLNA	3	0	4	0	0	1	0	3	1	0	1	0	1	1	0	11414000	0	19154000	0	0	0	0	0	0	0	0	0	0	0	0
P40305	IFI27	0	0	0	0	0	0	0	0	0	0	0	0	0	0	0	0	0	0	0	0	0	0	0	0	0	0	0	0	0	0
P40394	ADH7	0	1	0	0	0	0	0	0	0	0	0	0	0	0	0	0	27621000	0	0	0	0	0	0	0	0	0	0	0	0	0
P40616	ARL1	4	1	2	0	1	5	2	4	4	3	2	3	4	2	1	50975000	0	56061000	0	0	91485000	89573000	118660000	89934000	83668000	77447000	84377000	92149000	71821000	0
P40763	STAT3	0	0	0	0	0	0	1	0	0	0	0	4	0	0	0	0	0	0	0	0	0	0	0	0	0	0	61945000	0	0	0
P40937	RFC5	1	0	1	0	0	5	0	1	1	0	0	0	0	0	0	0	0	0	0	0	41072000	0	0	0	0	0	0	0	0	0
P40938	RFC3	4	0	2	0	0	1	0	3	2	0	0	0	0	0	0	36053000	0	0	0	0	0	0	20502000	21850000	0	0	0	0	0	0
P41214	EIF2D	2	0	3	0	0	1	0	2	0	0	0	0	1	0	0	0	0	27998000	0	0	0	0	0	0	0	0	0	0	0	0
P41223	BUD31	1	0	0	0	0	1	0	0	0	0	0	0	0	0	0	0	0	0	0	0	0	0	0	0	0	0	0	0	0	0
P41227;Q9BSU3	NAA10	2	0	1	0	0	2	0	1	0	0	0	0	0	0	0	0	0	0	0	0	61470000	0	0	0	0	0	0	0	0	0
P41240	CSK	0	0	2	0	0	2	0	0	0	0	0	0	0	0	0	0	0	0	0	0	0	0	0	0	0	0	0	0	0	0
P41250	GARS	7	0	10	0	1	8	2	7	5	0	1	6	2	1	0	177450000	0	90606000	0	0	81295000	21224000	72269000	91227000	0	0	149850000	46732000	0	0
P41252	IARS	27	1	23	2	6	23	5	25	16	3	11	8	16	3	1	618780000	0	522550000	29922000	41939000	589450000	72240000	539980000	382190000	56025000	387340000	164350000	297800000	40502000	0
P41440	SLC19A1	0	0	0	0	0	1	0	0	0	0	0	0	0	0	0	0	0	0	0	0	0	0	0	0	0	0	0	0	0	0
P42025	ACTR1B	6	0	5	0	0	6	0	2	3	0	4	2	3	0	0	28370000	0	0	0	0	0	0	0	0	0	0	0	0	0	0
P42126	ECI1	3	0	2	0	0	4	0	0	0	0	2	0	0	0	0	36030000	0	40094000	0	0	0	0	0	0	0	0	0	0	0	0
P42285	SKIV2L2	2	0	1	0	0	4	0	3	3	2	0	0	2	1	0	0	0	0	0	0	20936000	0	30152000	0	30144000	0	0	16025000	0	0
Q04828;P42330;P52895	AKR1C1;AKR1C3;AKR1C2	0	1	0	0	0	0	1	0	0	0	0	2	0	0	0	0	0	0	0	0	0	0	0	0	0	0	35986000	0	0	0
P42345	MTOR	2	0	0	0	0	4	0	0	0	0	0	0	0	0	0	0	0	0	0	0	21480000	0	0	0	0	0	0	0	0	0
P42356	PI4KA	0	0	1	0	0	0	0	0	0	0	0	0	0	0	0	0	0	0	0	0	0	0	0	0	0	0	0	0	0	0
P42765	ACAA2	2	0	4	0	0	2	0	1	1	0	2	2	2	0	0	0	0	20662000	0	0	30138000	0	0	0	0	53976000	0	0	0	0
P42785	PRCP	0	0	4	0	0	4	0	2	1	0	3	1	2	1	0	0	0	0	0	0	40893000	0	0	0	0	65117000	0	0	0	0
P42892	ECE1	0	0	0	0	0	2	0	0	0	0	0	0	0	0	0	0	0	0	0	0	23790000	0	0	0	0	0	0	0	0	0
P43034	PAFAH1B1	6	1	4	0	2	5	1	5	1	1	3	2	1	0	1	65828000	0	54594000	0	38365000	50738000	0	54894000	0	0	52184000	69816000	0	0	0
P43121	MCAM	3	0	1	0	0	3	0	2	2	0	1	0	0	0	0	33421000	0	0	0	0	35698000	0	34878000	34230000	0	0	0	0	0	0
P43246	MSH2	2	0	8	0	0	4	0	6	5	0	1	0	2	0	0	14877000	0	30965000	0	0	35341000	0	24074000	19062000	0	0	0	19353000	0	0
P43304	GPD2	17	1	14	1	1	22	2	16	10	0	12	2	15	1	0	154630000	0	240110000	0	0	316110000	38879000	205510000	196480000	0	460340000	41297000	368780000	0	0
P43487;Q9C010	RANBP1	6	0	6	0	0	6	1	3	2	0	1	1	3	0	0	119230000	0	136370000	0	0	168910000	0	85992000	86888000	0	0	0	47381000	0	0
P43490	NAMPT	12	0	8	0	1	12	4	9	4	0	4	10	3	1	0	196550000	0	137690000	0	0	189260000	116420000	117170000	93745000	0	92892000	361270000	57983000	0	0
P43686	PSMC4	8	1	13	0	2	12	2	11	6	1	4	2	3	0	0	184750000	0	253100000	0	27866000	294820000	75998000	185210000	147190000	0	125960000	67571000	110520000	0	0
P43897	TSFM	4	0	3	0	1	5	2	3	3	2	4	0	1	0	1	49345000	0	44849000	0	0	71207000	45645000	54367000	66810000	44425000	85309000	0	0	0	0
P45877	PPIC	1	0	1	0	0	1	0	0	0	0	0	0	0	0	0	0	0	0	0	0	0	0	0	0	0	0	0	0	0	0
P45954	ACADSB	0	0	3	0	0	1	0	1	1	0	1	1	1	0	0	0	0	0	0	0	57665000	0	0	0	0	0	0	0	0	0
P45973	CBX5	2	0	1	0	0	4	0	3	3	0	2	0	2	0	0	24240000	0	0	0	0	31518000	0	32866000	32760000	0	39690000	0	33528000	0	0
P45974	USP5	7	0	8	0	0	13	2	7	6	1	5	7	2	1	0	92554000	0	70763000	0	0	148940000	38290000	77182000	64909000	0	61172000	124250000	35765000	0	0
P46013	MKI67	1	0	0	0	0	0	0	23	5	0	0	0	0	0	0	0	0	0	0	0	0	0	185080000	28701000	0	0	0	0	0	0
P46060	RANGAP1	15	1	15	0	1	13	2	9	5	0	7	2	5	1	0	266410000	0	220550000	0	0	309680000	38278000	142910000	106030000	0	210420000	42046000	111690000	0	0
P46063	RECQL	7	1	9	1	4	4	3	15	10	6	2	1	8	1	1	125260000	0	122680000	0	77471000	72995000	109300000	234990000	177050000	129620000	47345000	0	135730000	0	0
P46087	NOP2	9	1	10	0	1	6	6	16	13	10	6	0	7	0	0	121500000	0	138740000	0	0	106990000	97656000	288210000	225220000	186390000	93079000	0	151650000	0	0
P46100	ATRX	1	0	2	0	0	3	0	3	1	0	1	0	2	0	0	0	0	0	0	0	9501800	0	0	0	0	0	0	0	0	0
P46108	CRK	0	0	0	0	0	0	0	0	0	0	0	0	0	0	0	0	0	0	0	0	0	0	0	0	0	0	0	0	0	0
P46109	CRKL	1	0	0	0	0	1	0	2	1	0	1	0	1	0	0	0	0	0	0	0	0	0	0	0	0	0	0	0	0	0
P46199	MTIF2	0	0	1	0	0	1	0	0	0	0	1	0	3	0	0	0	0	0	0	0	0	0	0	0	0	9566100	0	0	0	0
P46379	BAG6	9	0	7	0	0	11	1	7	6	0	4	1	2	0	0	118680000	0	51580000	0	0	125550000	0	57289000	55781000	0	51317000	0	21777000	0	0
P46734;P52564	MAP2K3	0	0	1	0	1	0	0	3	1	0	0	1	0	0	0	0	0	0	0	0	0	0	9780900	0	0	0	0	0	0	0
P46736	BRCC3	1	0	1	0	0	1	0	0	0	0	1	0	0	0	0	0	0	0	0	0	0	0	0	0	0	11718000	0	0	0	0
P46778	RPL21	2	1	5	1	1	1	2	2	2	2	1	2	2	3	1	558540000	0	588190000	0	169620000	803750000	351580000	574700000	559670000	280470000	958460000	299070000	545630000	267490000	0
P46821	MAP1B	14	0	14	0	1	11	0	7	4	0	2	1	4	0	0	165530000	0	106480000	0	0	111400000	0	53417000	38373000	0	42903000	0	43973000	0	0
P46926;Q8TDQ7	GNPDA1	9	1	6	0	1	3	0	3	3	0	0	1	1	0	0	166060000	0	82409000	0	0	45315000	0	42497000	32210000	0	0	0	0	0	0
P46939	UTRN	7	0	6	0	0	8	0	8	5	0	5	0	8	1	0	38673000	0	33719000	0	0	58548000	0	42762000	35382000	0	51655000	0	48990000	0	0
P46940	IQGAP1	39	8	37	2	6	41	10	25	24	1	17	36	24	3	2	1175800000	105720000	978470000	27463000	81548000	817680000	179600000	419980000	395000000	0	399920000	1776100000	467070000	37500000	0
P46976	GYG1	1	0	2	0	0	0	0	1	0	0	0	0	0	0	0	0	0	17236000	0	0	0	0	0	0	0	0	0	0	0	0
P47224	RABIF	0	0	0	0	0	0	0	0	0	0	0	0	0	0	0	0	0	0	0	0	0	0	0	0	0	0	0	0	0	0
P47736	RAP1GAP	0	1	0	0	1	0	0	0	0	0	0	0	0	0	0	0	85823000	0	0	61354000	0	0	0	0	0	0	0	0	0	0
P47755	CAPZA2	7	0	5	1	1	5	2	5	4	3	2	5	4	2	1	59183000	0	89077000	0	0	67935000	0	35667000	52155000	0	0	105220000	36519000	0	0
P47813;O14602	EIF1AX;EIF1AY	3	0	3	1	2	4	0	2	3	0	2	0	2	0	0	91024000	0	76555000	0	44817000	165660000	0	31056000	61771000	0	76107000	0	89672000	0	0
P47895;O94788	ALDH1A3	14	1	16	1	0	19	6	13	11	0	7	2	9	2	0	342650000	0	304300000	0	0	529010000	194610000	344550000	386290000	0	252030000	84829000	227110000	0	0
P47985;P0C7P4	UQCRFS1;UQCRFS1P1	0	0	3	1	0	7	0	5	6	0	3	2	1	1	1	0	0	29965000	0	0	115710000	0	51287000	58312000	0	99091000	0	0	0	0
P47989	XDH	0	0	0	0	0	0	0	0	0	0	0	0	0	0	0	0	0	0	0	0	0	0	0	0	0	0	0	0	0	0
P48059	LIMS1	1	0	1	0	0	1	0	1	0	0	1	0	1	0	0	0	0	0	0	0	0	0	0	0	0	49068000	0	0	0	0
P48147	PREP	2	0	0	0	0	1	1	0	0	0	0	4	0	0	1	0	0	0	0	0	0	0	0	0	0	0	32303000	0	0	0
P48426;P78356	PIP4K2A;PIP4K2B	0	0	0	0	0	0	0	0	0	0	0	0	0	0	0	0	0	0	0	0	0	0	0	0	0	0	0	0	0	0
P48449	LSS	6	0	7	0	0	7	0	4	2	0	5	0	2	0	0	69562000	0	52571000	0	0	58259000	0	33731000	27694000	0	68061000	0	29438000	0	0
P48509	CD151	2	0	2	0	1	2	0	2	1	0	2	0	2	0	1	105350000	0	105180000	0	0	134070000	0	64323000	0	0	158890000	0	94259000	0	0
P48556	PSMD8	5	0	4	0	0	6	1	6	5	1	2	3	5	0	0	123240000	0	90474000	0	0	193440000	0	61521000	75391000	0	158200000	88148000	52325000	0	0
P48594	SERPINB4	0	5	7	6	5	0	13	7	9	8	0	22	3	2	4	0	0	0	240100000	0	0	659940000	0	0	0	0	2648000000	0	0	0
P48637	GSS	1	2	3	0	3	3	2	1	1	2	1	2	1	1	1	0	0	0	0	0	0	46008000	0	0	36341000	0	54731000	0	0	0
P48643	CCT5	22	4	18	0	8	17	4	16	12	4	8	8	7	3	1	1250900000	77308000	730300000	0	183140000	791540000	101840000	484290000	489970000	138130000	394800000	254760000	268500000	84250000	0
P48651	PTDSS1	2	4	5	2	3	2	4	5	7	5	2	1	5	5	2	0	154010000	108030000	282040000	184410000	111140000	139610000	120670000	138470000	129010000	75026000	0	88543000	121470000	0
P48723	HSPA13	2	0	0	0	0	1	0	0	0	0	0	0	0	0	0	20024000	0	0	0	0	0	0	0	0	0	0	0	0	0	0
P48729;Q8N752	CSNK1A1	1	0	4	0	1	2	0	3	3	2	1	5	1	0	1	0	0	25768000	0	0	39444000	0	28266000	27097000	0	0	63570000	0	0	0
P48739	PITPNB	4	0	4	0	0	5	0	2	2	0	3	3	2	1	0	41458000	0	27739000	0	0	37632000	0	30015000	35966000	0	54300000	52420000	0	0	0
P48960;Q9UHX3	CD97	3	1	6	0	1	5	1	3	2	1	3	1	2	1	0	64015000	0	77121000	0	0	83818000	0	67138000	73744000	0	79738000	0	38234000	0	0
P49005	POLD2	1	0	0	0	0	2	0	2	1	0	0	0	0	0	0	0	0	0	0	0	0	0	11634000	0	0	0	0	0	0	0
P49006	MARCKSL1	5	1	3	0	2	2	1	2	2	1	2	1	2	1	0	61345000	0	98873000	0	56592000	71258000	0	73880000	75903000	0	70509000	0	48513000	0	0
P49023	PXN	12	2	18	0	3	15	4	13	11	2	7	0	11	4	0	311670000	51064000	506410000	0	78393000	587490000	133110000	462990000	372900000	64663000	274320000	0	340690000	179750000	0
P49069	CAMLG	0	0	0	0	0	1	0	0	0	0	0	0	0	0	0	0	0	0	0	0	9528100	0	0	0	0	0	0	0	0	0
P49189	ALDH9A1	7	6	10	2	8	6	5	5	4	0	4	5	4	4	1	134270000	223910000	215910000	100990000	204150000	114020000	126190000	91211000	111090000	0	152330000	348270000	147990000	148930000	0
P49247	RPIA	0	0	0	0	0	0	0	1	0	0	0	0	0	0	0	0	0	0	0	0	0	0	4137300	0	0	0	0	0	0	0
P49257	LMAN1	8	1	9	0	3	7	1	8	6	1	9	0	6	1	0	395150000	0	384970000	0	141210000	353500000	0	234420000	233070000	0	541060000	0	281320000	0	0
P49321	NASP	2	0	1	0	0	6	0	0	0	0	1	0	0	0	0	0	0	0	0	0	87806000	0	0	0	0	0	0	0	0	0
P49366	DHPS	0	0	0	0	0	0	0	0	0	0	0	0	0	0	0	0	0	0	0	0	0	0	0	0	0	0	0	0	0	0
P49406	MRPL19	2	0	1	0	0	2	0	3	1	0	2	0	3	0	0	0	0	0	0	0	18820000	0	17077000	0	0	25374000	0	14629000	0	0
P49419	ALDH7A1	13	2	13	0	6	9	2	9	7	1	2	7	6	2	0	249890000	48702000	233770000	0	116510000	249230000	73756000	117770000	152900000	0	83512000	187800000	139970000	0	0
P49458	SRP9	3	2	3	1	2	2	2	3	2	2	2	2	2	2	1	112010000	53880000	91852000	0	60116000	180500000	82454000	110740000	92374000	106370000	177700000	0	95494000	60980000	0
P49585;Q9Y5K3	PCYT1A;PCYT1B	5	0	4	0	0	3	1	4	1	0	3	1	3	0	0	34903000	0	40601000	0	0	31463000	0	36960000	0	0	85240000	0	50621000	0	0
P49588	AARS	16	0	12	0	0	12	0	10	7	0	6	2	3	1	0	171340000	0	204050000	0	0	236320000	0	109360000	69026000	0	99428000	0	0	0	0
P49590	HARS2	5	3	6	1	2	6	2	4	3	1	4	4	3	2	0	0	0	0	0	0	23795000	0	0	0	0	0	0	0	0	0
P49591	SARS	8	0	6	0	1	11	1	4	2	0	5	4	2	0	0	174990000	0	132790000	0	0	210790000	0	71506000	48903000	0	109150000	84224000	55175000	0	0
P49711;Q8NI51	CTCF	1	0	0	0	0	1	0	2	1	0	0	0	0	0	0	0	0	0	0	0	0	0	14611000	0	0	0	0	0	0	0
P49720	PSMB3	4	1	5	0	3	3	2	5	6	2	2	3	2	1	1	127420000	0	105310000	0	86930000	227650000	87696000	74571000	80248000	56412000	22913000	163040000	45770000	0	0
P49736	MCM2	12	0	9	0	0	16	2	13	11	4	7	0	6	0	0	170350000	0	132710000	0	0	251680000	34563000	140100000	153630000	79705000	152720000	0	86842000	0	0
P49754	VPS41	0	0	0	0	0	3	0	0	0	0	0	0	0	0	0	0	0	0	0	0	14147000	0	0	0	0	0	0	0	0	0
P49755	TMED10	7	1	3	1	2	6	2	5	3	1	2	2	4	1	1	237150000	0	306930000	0	86503000	142170000	0	136700000	162440000	80806000	181740000	101810000	137100000	0	0
P49757	NUMB	3	0	1	0	0	2	0	0	0	0	2	0	0	0	0	0	0	0	0	0	0	0	0	0	0	0	0	0	0	0
Q9HAZ1;P49759	CLK4;CLK1	0	0	0	0	1	0	0	0	0	0	0	0	0	0	0	0	0	0	0	4534300	0	0	0	0	0	0	0	0	0	0
P49768;P49810	PSEN1	1	0	1	0	0	0	0	0	0	0	0	0	0	0	0	0	0	0	0	0	0	0	0	0	0	0	0	0	0	0
P49770	EIF2B2	2	0	2	0	0	5	0	1	1	0	3	0	0	0	0	38514000	0	25230000	0	0	75118000	0	0	0	0	59692000	0	0	0	0
P49773	HINT1	3	0	3	0	0	4	0	2	1	0	0	0	0	0	0	92624000	0	41528000	0	0	0	0	0	0	0	0	0	0	0	0
P49790	NUP153	4	0	5	0	0	3	0	14	8	0	0	0	10	1	0	43566000	0	48534000	0	0	0	0	95604000	68890000	0	0	0	84362000	0	0
P49792	RANBP2	16	0	17	0	0	19	0	11	8	0	4	0	8	0	0	137730000	0	128640000	0	0	139670000	0	74681000	48354000	0	58956000	0	71739000	0	0
P49821	NDUFV1	4	0	3	0	0	13	0	7	5	0	6	2	5	2	0	34264000	0	22567000	0	0	154680000	0	44603000	44055000	0	103940000	33030000	57054000	14113000	0
P49841	GSK3B	0	0	1	0	0	3	0	1	1	0	1	0	0	0	0	0	0	0	0	0	0	0	0	0	0	0	0	0	0	0
P49862	KLK7	0	7	8	4	6	0	4	5	4	4	0	7	2	5	1	0	264350000	117240000	505140000	226510000	0	104200000	58231000	66279000	92496000	0	141480000	0	171260000	0
P49902	NT5C2	4	0	6	0	0	6	0	2	2	0	1	0	1	0	0	43918000	0	91732000	0	0	53835000	0	23259000	0	0	0	0	0	0	0
P49903	SEPHS1	2	0	0	0	0	1	0	0	0	0	0	0	0	0	0	0	0	0	0	0	13113000	0	0	0	0	0	0	0	0	0
P49915	GMPS	12	0	9	0	1	11	1	9	5	2	5	0	4	1	1	137110000	0	87630000	0	0	144440000	0	126330000	63914000	69831000	81479000	0	85907000	0	0
P49916	LIG3	0	0	0	0	0	1	0	3	0	0	1	0	0	0	0	0	0	0	0	0	0	0	10942000	0	0	0	0	0	0	0
P49959	MRE11A	3	0	1	0	0	2	0	3	2	0	1	0	0	0	0	17127000	0	0	0	0	0	0	0	0	0	0	0	0	0	0
P50213	IDH3A	3	1	4	0	0	5	1	3	2	1	1	0	2	1	0	66427000	0	55212000	0	0	80559000	0	58324000	70041000	0	0	0	83755000	0	0
P50281	MMP14	2	0	1	0	0	0	0	0	0	0	1	0	0	0	0	22197000	0	0	0	0	0	0	0	0	0	0	0	0	0	0
P50336	PPOX	1	0	2	0	0	2	0	1	0	0	1	0	0	0	0	0	0	0	0	0	20726000	0	0	0	0	0	0	0	0	0
P50402	EMD	6	3	6	3	2	7	4	8	6	3	6	3	8	5	0	103030000	60710000	133640000	140430000	235520000	124550000	69159000	170270000	164300000	117350000	138230000	87029000	173890000	102740000	0
P50416	CPT1A	11	0	8	1	1	10	2	11	8	4	5	0	8	3	2	108590000	0	84341000	0	0	141170000	58424000	138630000	120910000	60968000	173820000	0	121660000	55545000	0
P50452	SERPINB8	1	0	2	1	1	3	0	2	1	0	0	2	0	0	0	0	0	0	0	0	0	0	0	0	0	0	0	0	0	0
P50479	PDLIM4	0	0	0	0	0	0	0	0	0	0	0	0	0	0	0	0	0	0	0	0	0	0	0	0	0	0	0	0	0	0
P50549;P43268;P41161	ETV1;ETV4;ETV5	0	0	0	0	0	1	1	0	0	0	0	0	0	0	0	0	0	0	0	0	3814400	0	0	0	0	0	0	0	0	0
P50552	VASP	3	0	4	0	1	4	0	3	3	0	1	0	2	0	0	84072000	0	97483000	0	0	75830000	0	60087000	65769000	0	0	0	0	0	0
P50570;Q9UQ16	DNM2	13	0	15	1	3	9	2	12	10	2	6	8	11	4	1	374250000	0	265000000	0	41378000	190420000	24629000	241410000	223520000	22600000	142050000	240530000	210190000	78782000	0
P50579	METAP2	4	0	3	1	0	7	0	3	3	0	2	1	2	0	0	41529000	0	25524000	0	0	102700000	0	45965000	62046000	0	65384000	0	0	0	0
P50747	HLCS	0	0	2	0	0	0	0	0	0	0	0	0	0	0	0	0	0	11132000	0	0	0	0	0	0	0	0	0	0	0	0
P50750	CDK9	3	1	2	1	1	3	1	2	2	2	2	0	1	0	0	0	0	0	0	0	24849000	0	0	0	0	0	0	0	0	0
P50851;Q8NFP9	LRBA	0	0	2	0	0	4	0	2	2	0	2	2	3	0	0	0	0	0	0	0	16546000	0	7710800	10905000	0	0	11524000	0	0	0
P50895	BCAM	2	0	4	0	0	1	0	1	1	0	1	0	1	0	0	21511000	0	22684000	0	0	0	0	0	0	0	0	0	0	0	0
P50991	CCT4	19	2	18	0	7	20	7	19	16	4	9	8	11	5	1	1331000000	76289000	1010200000	0	245070000	1353800000	305580000	848400000	759210000	108460000	570450000	442840000	381390000	147450000	0
P50993	ATP1A2	7	0	11	1	0	8	0	7	6	0	5	1	7	0	0	0	0	0	0	0	5630200	0	0	0	0	0	0	0	0	0
P51003;Q9NRJ5;Q9BWT3	PAPOLA	0	0	2	1	0	1	0	1	1	0	0	0	0	0	0	0	0	5251400	0	0	0	0	0	0	0	0	0	0	0	0
P51116	FXR2	5	2	5	1	2	6	1	5	4	2	2	1	3	2	1	25532000	0	24467000	0	0	25758000	0	22678000	0	0	0	0	0	0	0
P51148	RAB5C	3	2	3	1	1	3	2	3	2	1	3	4	3	2	2	0	0	0	0	0	0	0	0	0	0	0	4420400	0	0	0
P51151;Q9NP90	RAB9A	2	0	0	0	0	2	0	0	0	0	0	0	0	0	0	0	0	0	0	0	0	0	0	0	0	0	0	0	0	0
P51153	RAB13	4	2	4	1	2	4	2	5	4	3	2	1	4	2	2	17739000	0	0	0	0	0	0	27471000	0	0	0	0	15121000	0	0
P51398	DAP3	4	0	1	0	0	7	0	5	3	0	2	0	1	0	0	24462000	0	0	0	0	68826000	0	21936000	44279000	0	0	0	0	0	0
P51452	DUSP3	3	0	2	0	0	2	0	0	0	0	1	0	1	0	0	44105000	0	0	0	0	34858000	0	0	0	0	0	0	0	0	0
P51532;P51531	SMARCA4	1	0	7	0	0	5	0	5	6	1	2	0	4	1	0	0	0	23618000	0	0	36724000	0	39713000	31222000	0	33894000	0	40448000	0	0
P51553	IDH3G	5	0	3	0	1	4	0	1	0	0	3	2	2	0	0	165970000	0	219100000	0	0	207920000	0	0	0	0	242860000	73949000	161950000	0	0
P51570	GALK1	6	0	4	1	0	6	0	5	3	1	4	0	3	0	1	46971000	0	44564000	0	0	50674000	0	38505000	42970000	0	60243000	0	38864000	0	0
P51608	MECP2	0	0	2	0	0	1	1	7	4	0	0	0	3	2	0	0	0	21433000	0	0	0	0	45608000	34002000	0	0	0	48959000	0	0
P51610	HCFC1	11	1	10	0	1	15	2	9	5	3	6	1	7	2	1	78077000	0	74131000	0	0	119040000	69677000	117040000	82466000	63849000	81670000	0	79981000	67154000	0
P51649	ALDH5A1	1	0	3	0	0	1	0	2	1	0	0	0	1	0	0	0	0	19085000	0	0	0	0	11411000	0	0	0	0	0	0	0
P51665	PSMD7	8	0	9	0	0	9	0	7	6	0	3	3	0	0	0	169840000	0	131200000	0	0	211830000	0	70980000	83412000	0	155420000	111260000	0	0	0
P51688	SGSH	0	0	1	0	0	0	0	0	0	0	0	0	0	0	0	0	0	0	0	0	0	0	0	0	0	0	0	0	0	0
P51808	DYNLT3	2	0	0	0	0	2	0	1	0	0	1	0	1	0	0	65735000	0	0	0	0	54180000	0	0	0	0	83278000	0	0	0	0
P51809	VAMP7	2	0	0	0	0	2	0	1	0	0	2	0	0	0	0	0	0	0	0	0	22749000	0	0	0	0	20154000	0	0	0	0
P51812;Q9UK32	RPS6KA3	8	0	12	0	0	9	1	3	5	1	6	1	2	1	0	130560000	0	145630000	0	0	92187000	0	64144000	47130000	0	127320000	0	45941000	0	0
P51965;Q96LR5;Q969T4	UBE2E1;UBE2E2;UBE2E3	1	0	1	0	0	1	0	1	1	0	0	0	0	0	0	0	0	0	0	0	0	0	0	0	0	0	0	0	0	0
P51970	NDUFA8	3	0	1	0	0	5	1	0	1	0	5	1	0	0	0	94365000	0	0	0	0	107530000	0	0	67523000	0	257290000	0	0	0	0
P52292	KPNA2	2	0	6	0	0	13	2	8	8	2	0	0	2	0	0	49132000	0	147120000	0	0	310200000	53909000	121110000	129030000	40184000	0	0	34860000	0	0
P52294	KPNA1	5	0	4	0	0	4	0	4	4	0	4	0	1	0	0	0	0	0	0	0	0	0	13142000	19027000	0	0	0	0	0	0
P52306	RAP1GDS1	1	0	1	0	0	1	0	1	1	0	0	0	0	0	0	9941400	0	0	0	0	0	0	0	0	0	0	0	0	0	0
P52434	POLR2H	0	0	0	0	0	0	0	1	0	0	0	0	0	0	0	0	0	0	0	0	0	0	0	0	0	0	0	0	0	0
P52565	ARHGDIA	2	2	5	1	3	5	1	4	2	1	3	3	3	2	1	154130000	108260000	167760000	0	111550000	142900000	0	107150000	117760000	0	147930000	185450000	113820000	90894000	0
P52594	AGFG1	1	0	1	0	0	2	0	0	0	0	0	0	0	0	0	0	0	0	0	0	22086000	0	0	0	0	0	0	0	0	0
P52630	STAT2	3	0	2	0	0	1	0	2	1	0	2	0	1	0	0	23513000	0	0	0	0	0	0	0	0	0	0	0	0	0	0
P52701	MSH6	0	0	2	0	0	3	0	5	3	0	0	0	2	0	0	0	0	0	0	0	28704000	0	32016000	24393000	0	0	0	21098000	0	0
P52756	RBM5	0	0	1	0	0	0	0	1	0	1	0	0	0	0	0	0	0	0	0	0	0	0	0	0	10316000	0	0	0	0	0
P52788	SMS	0	0	1	0	0	5	0	0	1	0	0	0	0	0	0	0	0	0	0	0	52379000	0	0	0	0	0	0	0	0	0
P52789	HK2	14	1	11	1	3	8	2	8	7	1	3	4	6	2	1	80546000	0	49016000	0	0	59856000	0	34379000	43677000	0	0	0	13032000	0	0
P52815	MRPL12	4	0	2	1	0	4	0	3	0	0	4	1	3	0	0	156980000	0	73925000	0	0	336750000	0	68154000	0	0	359300000	0	78359000	0	0
P52888	THOP1	0	0	1	0	0	0	0	0	0	0	0	0	0	0	0	0	0	3587600	0	0	0	0	0	0	0	0	0	0	0	0
P52926	HMGA2	2	0	3	0	0	0	1	1	1	1	0	0	1	0	0	0	0	8595300	0	0	0	0	0	0	0	0	0	0	0	0
P52948	NUP98	8	0	7	0	0	8	0	9	6	0	4	0	3	0	0	49413000	0	46959000	0	0	54404000	0	53480000	60751000	0	51239000	0	48318000	0	0
P53004	BLVRA	4	0	3	0	0	3	1	4	4	1	2	1	2	1	0	56815000	0	23333000	0	0	60073000	0	31657000	32971000	0	53068000	0	25780000	0	0
P53007	SLC25A1	7	1	7	0	1	3	0	3	3	0	4	1	3	1	0	118080000	0	131460000	0	0	108860000	0	95391000	99672000	0	132750000	0	124700000	0	0
P53041	PPP5C	1	0	0	0	0	0	0	0	0	0	0	0	0	0	0	0	0	0	0	0	0	0	0	0	0	0	0	0	0	0
P53365	ARFIP2	1	0	0	0	0	3	0	0	1	0	1	0	1	0	0	0	0	0	0	0	29010000	0	0	0	0	0	0	0	0	0
P53367	ARFIP1	1	0	2	0	1	2	0	0	1	0	1	0	0	0	0	0	0	32901000	0	0	0	0	0	0	0	0	0	0	0	0
P53396	ACLY	26	0	28	0	3	26	5	22	21	4	13	3	16	3	1	725360000	0	685470000	0	12583000	770090000	64401000	471890000	475380000	42254000	260300000	58776000	320690000	34764000	0
P53582	METAP1	3	0	2	0	0	4	0	2	2	0	0	0	0	0	0	0	0	0	0	0	0	0	16078000	15570000	0	0	0	0	0	0
P53602	MVD	0	0	0	0	0	0	0	0	0	0	0	0	0	0	0	0	0	0	0	0	0	0	0	0	0	0	0	0	0	0
P53634	CTSC	0	1	0	1	1	2	1	1	1	1	1	2	1	1	1	0	0	0	0	0	0	0	0	0	0	0	128360000	0	0	0
P53675	CLTCL1	21	6	17	3	9	20	10	17	16	5	14	7	18	9	6	0	0	0	0	0	0	0	0	43083000	0	0	0	0	0	0
P53680	AP2S1	1	1	1	0	0	3	1	3	4	0	2	0	3	0	0	0	0	0	0	0	117710000	0	127440000	84718000	0	103090000	0	100120000	0	0
P53701	HCCS	2	0	2	0	0	3	0	2	1	0	2	0	0	0	0	48619000	0	33388000	0	0	36721000	0	33434000	0	0	48658000	0	0	0	0
P53794	SLC5A3	3	0	0	0	0	2	0	3	3	1	2	0	1	0	0	20561000	0	0	0	0	24367000	0	35457000	31137000	0	45495000	0	0	0	0
P53801	PTTG1IP	2	0	2	0	1	1	0	0	0	0	2	0	1	0	0	189450000	0	133260000	0	0	0	0	0	0	0	80827000	0	0	0	0
P53814	SMTN	0	0	1	0	0	0	0	2	1	0	0	1	1	0	0	0	0	0	0	0	0	0	0	0	0	0	0	0	0	0
P53985	SLC16A1	2	0	4	0	2	3	1	3	1	0	2	0	1	0	0	55727000	0	66447000	0	59048000	52027000	0	114300000	139890000	0	78784000	0	77798000	0	0
P53990	IST1	2	1	2	0	1	1	0	1	1	0	0	0	0	0	0	0	0	16664000	0	0	0	0	0	0	0	0	0	0	0	0
P53999	SUB1	3	1	2	1	1	3	1	3	3	1	2	3	1	1	0	48223000	0	77089000	0	0	81322000	0	80255000	64805000	0	73194000	95252000	0	0	0
P54098	POLG	0	0	0	0	0	0	0	1	0	2	0	0	2	0	1	0	0	0	0	0	0	0	0	0	23293000	0	0	0	0	0
P54108	CRISP3	0	2	0	0	0	0	0	0	0	0	0	0	0	0	0	0	38875000	0	0	0	0	0	0	0	0	0	0	0	0	0
P54132	BLM	1	0	1	0	0	0	0	1	1	1	1	1	2	1	1	0	0	0	0	0	0	0	72041000	0	0	0	0	0	0	0
P54577	YARS	12	0	9	0	1	7	0	5	4	0	2	3	1	0	0	123740000	0	61094000	0	0	62966000	0	42404000	40351000	0	26340000	39376000	0	0	0
P54578	USP14	6	0	7	0	2	10	0	6	3	0	3	1	3	1	0	140990000	0	131680000	0	45399000	232950000	0	106390000	66596000	0	77412000	0	80568000	0	0
P54619;Q9UGJ0	PRKAG1	2	0	4	0	0	8	0	4	1	0	1	0	1	0	0	37246000	0	46900000	0	0	72845000	0	31921000	0	0	0	0	0	0	0
P54652	HSPA2	11	8	11	4	9	13	8	8	9	7	8	9	9	7	6	5925300	0	0	0	0	0	0	0	0	0	0	0	0	0	0
P54707	ATP12A	2	0	3	0	0	2	0	2	2	0	2	2	1	0	0	0	0	0	0	0	0	0	0	0	0	0	22277000	0	0	0
P54709	ATP1B3	4	1	5	0	1	3	0	3	3	1	4	1	4	2	0	92370000	0	64824000	0	0	85585000	0	82170000	60503000	0	153300000	0	84809000	59748000	0
P54725	RAD23A	0	0	0	0	0	0	0	0	0	0	0	0	0	0	0	0	0	0	0	0	0	0	0	0	0	0	0	0	0	0
P54727	RAD23B	0	0	0	0	0	1	0	1	0	0	0	0	0	0	0	0	0	0	0	0	0	0	0	0	0	0	0	0	0	0
P54819	AK2	5	0	5	0	1	5	1	6	3	0	2	3	5	2	1	140000000	0	85187000	0	0	104940000	0	58466000	66118000	0	0	88990000	78216000	60070000	0
P54920;Q9H115	NAPA	12	0	7	0	2	8	1	6	4	0	4	7	2	1	1	152030000	0	94145000	0	41572000	120930000	0	59903000	53968000	0	66627000	145480000	47641000	0	0
P55010	EIF5	7	1	6	0	1	7	1	7	6	2	2	3	4	1	0	178720000	0	112500000	0	0	170670000	0	133920000	148260000	73287000	112910000	86371000	105560000	0	0
P55011;Q13621	SLC12A2	11	1	16	0	2	10	0	12	6	1	11	0	11	6	0	198370000	0	243720000	0	26472000	158210000	0	181290000	122870000	0	264170000	0	256930000	105480000	0
P55036;A2A3N6	PSMD4	7	0	4	0	1	7	0	4	1	0	3	0	4	0	0	169320000	0	167790000	0	0	230240000	0	59937000	0	0	164250000	0	39705000	0	0
P55039	DRG2	0	0	2	0	0	1	0	1	1	0	0	1	1	0	0	0	0	0	0	0	0	0	12725000	0	0	0	0	0	0	0
P55081	MFAP1	0	0	0	0	0	0	1	0	1	1	0	0	0	0	0	0	0	0	0	0	0	0	0	0	0	0	0	0	0	0
P55085	F2RL1	0	0	1	0	0	0	0	0	0	0	0	0	0	0	0	0	0	11592000	0	0	0	0	0	0	0	0	0	0	0	0
P55145	MANF	6	1	8	0	4	7	1	6	3	0	4	2	6	2	0	430620000	0	312370000	0	97076000	535840000	0	125200000	113470000	0	540780000	0	161510000	61137000	0
P55209	NAP1L1	8	1	7	0	3	8	3	6	5	2	4	1	3	3	1	409310000	0	466050000	0	151700000	511130000	64706000	267070000	297890000	95114000	286540000	0	187410000	105110000	0
P55263	ADK	5	1	5	0	1	8	2	2	3	1	4	1	4	1	1	114590000	0	70909000	0	0	126230000	61944000	69553000	82037000	0	107770000	0	88926000	0	0
P55265	ADAR	13	1	19	0	7	5	1	10	4	1	1	0	5	1	1	136400000	0	261880000	0	113160000	42311000	0	175610000	38482000	0	0	0	38213000	0	0
P55268	LAMB2	0	1	3	1	2	1	0	3	2	0	0	0	8	2	1	0	0	0	0	0	0	0	15189000	13083000	0	0	0	76184000	25568000	0
P55287	CDH11	3	0	2	0	0	3	0	0	0	0	1	0	1	1	1	26807000	0	0	0	0	24064000	0	0	0	0	0	0	0	0	0
P55327	TPD52	9	0	7	0	0	8	0	2	2	0	5	1	1	0	0	182140000	0	103060000	0	0	368690000	0	60808000	62503000	0	322510000	0	0	0	0
P55735	SEC13	1	0	3	0	1	1	1	4	2	1	1	0	3	0	0	0	0	36039000	0	0	0	0	49922000	47072000	0	0	0	48482000	0	0
P55769	NHP2L1	6	1	6	0	2	6	0	3	1	0	5	1	1	2	0	271490000	0	116360000	0	54338000	222710000	0	113140000	0	0	240280000	0	0	67752000	0
P55809	OXCT1	0	0	1	0	0	0	0	0	0	0	0	2	0	0	0	0	0	0	0	0	0	0	0	0	0	0	42342000	0	0	0
P55854	SUMO3	1	1	1	1	1	1	1	2	2	1	1	0	1	1	1	0	0	0	0	0	0	0	0	0	0	0	0	0	0	0
P55884	EIF3B	19	2	16	1	3	22	4	18	13	4	13	7	12	4	2	449130000	27776000	307260000	0	54890000	1047000000	126750000	522040000	312980000	105450000	584550000	170390000	263490000	80456000	0
P55899	FCGRT	2	0	0	0	0	3	0	0	0	0	1	0	1	0	0	22206000	0	0	0	0	17206000	0	0	0	0	0	0	0	0	0
P56134	ATP5J2	2	0	2	0	0	2	1	2	2	1	2	1	2	1	1	332100000	0	91778000	0	0	137240000	0	56171000	46938000	0	99393000	0	52524000	0	0
P56182	RRP1	1	0	1	0	0	1	0	2	0	0	1	0	0	0	0	0	0	0	0	0	0	0	0	0	0	0	0	0	0	0
P56192	MARS	24	1	15	0	2	17	4	16	13	4	6	2	10	2	1	554280000	0	394810000	0	36553000	473230000	67409000	244390000	256830000	77356000	222820000	0	225420000	0	0
P56199	ITGA1	2	0	3	0	0	6	0	4	2	0	2	0	1	0	0	25382000	0	38144000	0	0	50820000	0	21794000	0	0	0	0	0	0	0
Q5VTU8;P56381	ATP5EP2;ATP5E	0	0	1	0	0	1	0	1	0	0	1	0	1	0	0	0	0	0	0	0	0	0	0	0	0	0	0	0	0	0
P56385	ATP5I	4	1	2	0	1	2	0	2	1	0	2	1	0	0	0	85046000	0	55312000	0	0	83781000	0	34629000	0	0	108430000	0	0	0	0
P56545	CTBP2	4	0	3	0	1	7	2	3	2	2	3	1	3	1	1	54059000	0	140980000	0	0	69956000	36278000	55261000	57561000	41162000	50243000	0	65394000	0	0
P56556	NDUFA6	0	0	0	0	0	5	0	2	1	0	3	1	1	0	0	0	0	0	0	0	58144000	0	32014000	0	0	71662000	0	0	0	0
P56945	BCAR1	0	0	0	0	0	1	0	0	0	0	0	0	0	0	0	0	0	0	0	0	0	0	0	0	0	0	0	0	0	0
P57076	C21orf59	0	0	0	0	0	1	0	1	0	0	0	0	0	0	0	0	0	0	0	0	9012200	0	0	0	0	0	0	0	0	0
P57081	WDR4	1	0	1	0	0	1	0	1	0	0	0	0	0	0	0	0	0	0	0	0	10555000	0	0	0	0	0	0	0	0	0
P57721	PCBP3	5	3	6	2	3	3	4	3	5	3	3	3	4	3	3	0	0	0	0	0	0	0	0	0	0	0	0	3324500	0	0
P57723	PCBP4	1	0	1	0	0	1	1	0	1	0	1	0	0	0	0	0	0	0	0	0	0	0	0	0	0	0	0	0	0	0
P57735	RAB25	1	1	1	0	1	1	1	1	1	1	1	4	0	1	0	0	0	0	0	0	0	0	0	0	0	0	198950000	0	0	0
P57740	NUP107	2	0	1	0	0	6	0	3	4	0	1	0	4	0	0	0	0	0	0	0	33042000	0	36061000	38503000	0	0	0	50417000	0	0
P57764	GSDMD	2	0	2	0	0	4	0	0	0	0	1	0	0	0	0	25263000	0	29344000	0	0	24094000	0	0	0	0	0	0	0	0	0
P57772	EEFSEC	0	0	0	0	0	0	0	0	1	0	0	0	0	0	0	0	0	0	0	0	0	0	0	0	0	0	0	0	0	0
P58107	EPPK1	6	5	9	5	9	5	11	6	7	6	3	74	5	6	6	0	0	15576000	0	63682000	0	121910000	0	25699000	0	0	5353600000	0	0	0
P58335;Q9H6X2	ANTXR2	3	0	3	0	1	4	0	1	1	0	1	0	3	0	0	101950000	0	0	0	0	42403000	0	0	0	0	0	0	0	0	0
P58546	MTPN	1	0	1	0	1	1	0	1	1	0	0	1	1	0	0	0	0	0	0	0	0	0	0	0	0	0	32725000	0	0	0
P60002	ELOF1	0	1	1	0	1	0	0	0	0	0	0	0	0	0	0	0	0	0	0	18138000	0	0	0	0	0	0	0	0	0	0
P60014;P60371	KRTAP10-10;KRTAP10-6	0	0	0	0	0	0	0	0	0	2	0	0	0	0	0	0	0	0	0	0	0	0	0	0	124900000	0	0	0	0	0
P60033	CD81	2	0	2	0	0	1	0	1	1	0	1	0	1	0	0	0	0	0	0	0	76272000	0	0	0	0	0	0	0	0	0
P60059	SEC61G	1	0	1	0	0	1	0	1	1	0	0	0	1	0	0	0	0	0	0	0	0	0	15920000	0	0	0	0	0	0	0
P60370	KRTAP10-5	0	1	0	2	2	0	2	2	2	3	0	2	0	1	2	0	0	0	0	0	0	0	0	0	35696000	0	0	0	0	0
P60468	SEC61B	1	1	3	1	0	2	1	2	2	1	2	2	2	2	1	0	0	100570000	0	0	77284000	0	118420000	134310000	0	107540000	134640000	127870000	127090000	0
P60510	PPP4C	3	0	1	0	0	5	0	0	0	0	2	0	0	0	0	35632000	0	0	0	0	58670000	0	0	0	0	0	0	0	0	0
P60520	GABARAPL2	1	0	0	0	0	0	0	0	0	0	0	0	0	0	0	0	0	0	0	0	0	0	0	0	0	0	0	0	0	0
P60602	ROMO1	1	0	0	0	0	1	0	1	0	0	1	0	0	0	0	23891000	0	0	0	0	22999000	0	0	0	0	21585000	0	0	0	0
P60660	MYL6	5	3	4	4	2	5	1	5	5	1	4	7	3	2	0	127600000	101920000	135920000	206040000	91774000	153950000	0	128560000	144210000	0	153010000	815110000	171820000	0	0
P60891	PRPS1	6	1	3	0	1	6	0	3	2	0	2	0	2	0	0	109610000	0	50589000	0	0	95066000	0	33643000	44509000	0	47704000	0	24175000	0	0
P60903	S100A10	3	1	3	1	1	1	1	2	1	1	1	1	1	1	0	358360000	0	206400000	0	0	0	0	113590000	0	0	0	0	0	0	0
P60981	DSTN	4	2	5	3	2	7	1	5	3	1	2	0	3	1	0	133920000	45232000	105480000	0	49069000	141430000	0	59909000	110870000	0	92814000	0	0	0	0
P60983;O60234	GMFB;GMFG	1	0	0	0	0	2	0	0	0	0	0	0	0	0	0	0	0	0	0	0	33292000	0	0	0	0	0	0	0	0	0
P61009	SPCS3	2	0	2	0	0	2	0	2	0	0	3	1	1	0	0	27473000	0	20526000	0	0	56419000	0	0	0	0	70377000	0	0	0	0
P61011	SRP54	7	1	9	0	2	9	2	4	4	1	4	2	4	3	1	108720000	0	123830000	0	46892000	156840000	38387000	63688000	67405000	0	47142000	50591000	75678000	79058000	0
P61019	RAB2A	8	1	6	0	2	6	2	7	6	4	6	5	3	1	0	96504000	0	59444000	0	40844000	125610000	112120000	121370000	109880000	114710000	127410000	134590000	98669000	0	0
P62837;P61077;Q9Y2X8;P51668	UBE2D2;UBE2D3	1	0	2	0	0	3	0	2	1	0	1	1	1	0	0	0	0	38331000	0	0	82952000	0	24027000	0	0	0	0	0	0	0
P61081	UBE2M	5	0	6	0	2	5	3	5	4	1	5	2	2	1	1	164090000	0	106000000	0	0	195810000	123170000	197610000	184950000	0	152650000	66513000	142940000	0	0
P61088;Q5JXB2	UBE2N;UBE2NL	4	2	4	2	2	3	1	5	3	0	4	4	4	1	0	107650000	0	90239000	74109000	48347000	99859000	0	64656000	61524000	0	74093000	202870000	74009000	0	0
P61160	ACTR2	8	2	9	1	4	7	3	7	7	3	6	6	7	2	0	253470000	48099000	257650000	0	85288000	219890000	114090000	164820000	175740000	78818000	193360000	335110000	126630000	60333000	0
P61163	ACTR1A	10	1	8	1	2	12	2	7	6	1	5	3	5	1	1	472860000	0	302240000	0	61746000	506240000	76270000	196970000	188580000	0	236950000	157960000	172590000	0	0
P61201	COPS2	6	0	6	0	0	7	0	4	3	0	4	0	1	0	0	98276000	0	45431000	0	0	118630000	0	43992000	45183000	0	80976000	0	0	0	0
P61224;A6NIZ1	RAP1B	9	2	5	1	1	7	2	3	4	0	4	1	4	1	0	30811000	0	28147000	0	0	0	0	0	0	0	0	0	0	0	0
P61225;P10114	RAP2B	1	0	2	1	1	3	0	4	4	1	1	1	2	1	0	0	0	0	0	0	63260000	0	54693000	63349000	0	0	0	56424000	0	0
P61244	MAX	0	0	0	0	0	0	0	0	0	0	0	0	0	0	0	0	0	0	0	0	0	0	0	0	0	0	0	0	0	0
P61289	PSME3	4	0	3	0	0	5	0	2	1	0	2	0	1	0	0	73123000	0	59714000	0	0	100330000	0	47699000	0	0	54097000	0	0	0	0
P61326;Q96A72	MAGOH;MAGOHB	4	0	3	0	0	3	1	1	1	0	2	0	0	0	0	48778000	0	42429000	0	0	36240000	0	0	0	0	0	0	0	0	0
P61421	ATP6V0D1	6	0	2	0	0	8	0	1	1	0	3	0	1	0	0	71696000	0	33339000	0	0	98981000	0	0	0	0	63173000	0	0	0	0
P61457	PCBD1	1	0	2	0	1	4	0	1	1	0	2	0	0	0	0	0	0	0	0	0	74726000	0	0	0	0	43441000	0	0	0	0
P61513;A6NKH3	RPL37A	2	1	3	0	1	2	2	4	3	1	1	1	2	1	1	243070000	0	45405000	0	0	90031000	158740000	189330000	205750000	0	0	0	150870000	0	0
P61586	RHOA	7	3	8	1	3	8	1	3	4	1	6	1	3	2	0	586610000	139230000	337260000	0	135250000	566330000	0	223290000	210610000	0	424850000	0	220670000	67233000	0
P61758	VBP1	3	0	3	0	0	2	0	2	2	0	1	0	1	0	0	34593000	0	21890000	0	0	0	0	28385000	24644000	0	0	0	0	0	0
P61764	STXBP1	2	0	1	0	0	2	0	1	0	0	1	0	0	0	0	0	0	0	0	0	8872000	0	0	0	0	0	0	0	0	0
P61769	B2M	1	0	4	0	2	2	0	1	2	0	1	2	2	1	0	0	0	355850000	0	174950000	274610000	0	0	93456000	0	0	142780000	122080000	0	0
P61803	DAD1	3	1	3	3	2	3	2	4	4	2	3	2	3	3	1	100640000	0	98635000	186620000	102030000	142410000	111790000	120260000	121750000	89489000	232200000	79447000	123820000	104540000	0
P61916	NPC2	0	0	3	0	0	1	0	1	1	0	0	0	0	0	0	0	0	17146000	0	0	0	0	0	0	0	0	0	0	0	0
P61923	COPZ1	2	0	3	0	2	5	0	4	2	0	3	2	3	1	0	114020000	0	67431000	0	35223000	130050000	0	32712000	31008000	0	107310000	38173000	36852000	0	0
P61960	UFM1	1	0	1	0	0	3	1	2	1	1	1	2	1	1	1	0	0	0	0	0	37742000	0	29692000	0	0	0	46043000	0	0	0
P61962	DCAF7	3	0	1	0	0	1	0	1	1	0	0	0	0	0	0	0	0	0	0	0	17510000	0	0	0	0	0	0	0	0	0
P61964	WDR5	3	0	1	1	0	1	0	0	0	0	1	0	0	0	0	0	0	0	0	0	0	0	0	0	0	0	0	0	0	0
P61966	AP1S1	1	0	0	0	0	0	0	1	0	0	0	0	1	0	0	0	0	0	0	0	0	0	0	0	0	0	0	3414700	0	0
P61970	NUTF2	0	1	0	1	0	1	0	0	0	0	0	2	1	1	0	0	0	0	0	0	0	0	0	0	0	0	68422000	0	0	0
P61981	YWHAG	7	3	9	3	4	8	3	5	3	2	5	7	4	2	4	66597000	113700000	121560000	0	94812000	114160000	0	38410000	0	0	119900000	101370000	60326000	0	0
P62070	RRAS2	1	0	2	0	0	1	0	1	1	0	0	0	0	0	0	0	0	0	0	0	0	0	4900100	0	0	0	0	0	0	0
P62191	PSMC1	7	1	9	0	0	7	1	9	7	0	4	3	3	1	1	242490000	0	185800000	0	0	160210000	0	133340000	145640000	0	88757000	114520000	79794000	0	0
P62195	PSMC5	13	0	11	0	1	9	1	11	9	1	3	7	5	0	0	291890000	0	291770000	0	0	239370000	0	151940000	144500000	0	135840000	127270000	106760000	0	0
P62273	RPS29	2	0	2	0	0	1	0	2	2	0	1	1	2	1	0	56043000	0	48457000	0	0	0	0	37383000	30555000	0	0	0	23860000	0	0
P62304	SNRPE	1	0	2	1	2	3	1	3	2	1	2	1	1	1	1	0	0	104460000	0	221340000	103170000	0	127880000	120490000	0	0	0	0	0	0
P62306	SNRPF	0	0	1	2	1	1	0	0	0	1	0	0	0	0	0	0	0	0	0	0	0	0	0	0	0	0	0	0	0	0
P62310	LSM3	0	0	0	0	0	1	0	0	0	0	0	0	0	0	0	0	0	0	0	0	0	0	0	0	0	0	0	0	0	0
P62312	LSM6	1	0	1	0	0	2	0	1	1	0	1	1	0	0	0	0	0	0	0	0	40448000	0	0	0	0	0	0	0	0	0
P62328	TMSB4X	2	0	3	0	0	1	0	0	0	0	1	0	1	1	0	28899000	0	0	0	0	0	0	0	0	0	0	0	0	0	0
P62330	ARF6	4	0	3	1	2	3	1	3	3	1	1	1	2	1	1	41914000	0	41341000	0	28104000	0	0	40621000	48031000	0	0	0	42433000	0	0
P62333	PSMC6	13	0	13	0	2	11	3	7	6	1	5	3	5	0	0	476660000	0	305970000	0	21323000	233300000	49804000	112430000	185920000	0	154900000	99436000	93720000	0	0
P62341	SELT	0	0	0	0	0	1	0	0	0	0	1	0	1	0	0	0	0	0	0	0	10390000	0	0	0	0	0	0	0	0	0
P62495	ETF1	7	0	8	0	1	10	1	8	4	2	5	3	3	0	0	94207000	0	91104000	0	0	151740000	0	84016000	75813000	49718000	85832000	71326000	43883000	0	0
P62633	CNBP	1	0	3	0	2	1	1	2	1	0	1	0	0	1	0	0	0	36383000	0	50339000	0	0	0	0	0	0	0	0	0	0
P62699	YPEL5	0	0	0	0	0	1	0	0	0	0	1	0	0	0	0	0	0	0	0	0	0	0	0	0	0	0	0	0	0	0
P62736;P63267	ACTA2;ACTG2	15	13	16	9	14	15	12	15	15	11	13	20	13	11	9	0	0	0	0	0	0	0	0	68228000	0	0	0	0	0	0
P62820	RAB1A	7	4	11	3	5	8	7	10	10	5	4	6	7	5	6	355920000	0	76566000	0	0	126490000	0	62209000	117790000	0	0	0	0	0	0
P62834	RAP1A	8	2	4	1	1	6	2	2	3	0	3	1	4	1	0	624250000	75631000	196430000	0	0	385550000	67513000	64392000	108860000	0	313010000	0	126730000	0	0
P62841	RPS15	3	0	4	0	0	2	0	3	2	0	0	1	2	1	0	706530000	0	202330000	0	0	239100000	0	97792000	104220000	0	0	0	188430000	0	0
P62847	RPS24	4	2	5	0	4	2	2	4	4	3	1	2	4	2	1	337500000	182940000	332390000	0	236260000	480610000	263590000	367140000	442820000	269930000	0	188870000	332050000	245450000	0
P62857	RPS28	2	2	3	0	2	3	1	2	1	0	1	2	2	1	1	105040000	0	135780000	0	0	211250000	0	0	0	0	0	0	35816000	0	0
P62861	FAU	1	1	2	0	1	3	1	1	1	0	3	1	1	1	1	0	0	251560000	0	0	435550000	0	0	0	0	447530000	0	0	0	0
P62877	RBX1	0	0	0	0	0	0	0	0	0	0	0	0	0	0	0	0	0	0	0	0	0	0	0	0	0	0	0	0	0	0
Q59GN2;P62891	RPL39P5;RPL39	1	0	0	0	0	1	0	0	0	0	1	0	0	0	0	0	0	0	0	0	0	0	0	0	0	330090000	0	0	0	0
P63092;Q5JWF2;P38405	GNAS	8	2	8	1	3	10	3	5	6	2	8	2	4	2	2	101320000	0	88754000	0	39408000	116090000	0	54009000	64558000	0	179230000	0	77614000	0	0
P63151;Q66LE6;Q00005;Q9Y2T4	PPP2R2A	3	0	3	0	0	4	0	2	2	0	1	2	0	0	0	29117000	0	24925000	0	0	33349000	0	20282000	21297000	0	0	25757000	0	0	0
P63165	SUMO1	2	2	3	1	3	2	1	2	1	1	1	0	3	1	0	0	65412000	120020000	0	132470000	58314000	0	93244000	0	0	0	0	78943000	0	0
P63173	RPL38	6	2	4	0	2	5	2	5	5	4	5	1	3	2	1	491390000	112610000	218810000	0	146690000	662780000	120380000	211240000	223240000	146360000	628650000	0	209410000	140260000	0
P63208	SKP1	0	0	1	0	0	3	0	1	0	0	1	2	1	0	0	0	0	0	0	0	26530000	0	0	0	0	0	58376000	0	0	0
P63220	RPS21	2	0	4	0	1	3	0	1	1	1	1	2	1	0	0	69362000	0	62867000	0	0	102360000	0	0	0	0	0	0	0	0	0
P63279	UBE2I	4	0	3	0	0	3	0	1	1	1	0	1	2	1	1	81421000	0	53676000	0	0	46330000	0	0	0	0	0	0	0	0	0
P63313	TMSB10	0	0	0	0	0	0	0	0	0	0	0	0	0	0	0	0	0	0	0	0	0	0	0	0	0	0	0	0	0	0
P67775;P62714	PPP2CA;PPP2CB	7	0	6	0	1	6	0	2	3	1	2	3	1	0	0	104720000	0	73082000	0	0	131650000	0	54990000	72407000	0	59520000	96420000	0	0	0
P67812	SEC11A	1	0	1	1	0	3	0	3	1	1	1	1	2	1	1	0	0	0	0	0	42216000	0	23208000	0	0	0	0	35058000	0	0
P67870	CSNK2B	2	0	1	0	0	3	0	2	1	0	1	0	0	0	0	25467000	0	0	0	0	15656000	0	26569000	0	0	0	0	0	0	0
P67936	TPM4	3	2	7	1	3	2	1	2	2	0	2	10	1	0	0	0	0	0	0	0	0	0	0	0	0	0	140030000	0	0	0
P68032;P68133	ACTC1;ACTA1	17	14	18	9	15	17	12	15	15	11	14	20	13	11	10	2327400000	639810000	1226100000	0	406380000	3185300000	1053000000	1673300000	1823000000	0	0	7862000000	1214000000	0	0
P68400;Q8NEV1	CSNK2A1;CSNK2A3	6	0	5	0	0	9	0	4	2	0	2	1	2	0	0	95666000	0	68314000	0	0	83641000	0	30100000	66706000	0	53961000	0	55284000	0	0
P68431;Q16695;Q6NXT2	HIST1H3A;HIST3H3;H3F3C	6	3	5	3	3	8	6	7	7	5	7	4	7	6	5	0	0	0	0	0	393090000	0	0	0	0	0	0	0	0	0
P78310	CXADR	0	0	0	0	0	2	0	1	0	0	4	0	5	0	0	0	0	0	0	0	0	0	0	0	0	67273000	0	45078000	0	0
P78316	NOP14	0	0	0	0	0	0	0	4	1	2	0	0	0	0	0	0	0	0	0	0	0	0	24802000	0	0	0	0	0	0	0
P78318	IGBP1	2	0	2	0	0	2	0	2	1	0	0	0	0	0	0	29275000	0	0	0	0	0	0	0	0	0	0	0	0	0	0
Q5TFQ8;P78324;O00241	SIRPB1;SIRPA	0	0	0	0	0	0	0	0	0	0	0	0	0	0	0	0	0	0	0	0	0	0	0	0	0	0	0	0	0	0
P78330	PSPH	1	1	0	0	1	0	0	0	0	1	0	0	0	0	0	0	0	0	0	0	0	0	0	0	0	0	0	0	0	0
P78344	EIF4G2	13	0	11	0	0	14	4	10	7	4	4	2	9	1	0	141150000	0	124080000	0	0	222690000	53375000	162550000	138060000	80161000	107820000	0	133870000	0	0
P78345	RPP38	0	0	0	0	0	0	0	0	0	0	0	0	0	0	0	0	0	0	0	0	0	0	0	0	0	0	0	0	0	0
P78346	RPP30	2	0	2	0	0	5	0	4	2	0	2	0	2	0	0	0	0	0	0	0	31397000	0	16676000	28737000	0	0	0	0	0	0
P78347;Q86UP8;Q6EKJ0	GTF2I	11	0	14	0	1	12	8	17	13	9	9	3	10	4	0	196270000	0	212000000	0	0	244960000	211830000	336680000	282980000	222840000	237840000	48489000	303820000	152490000	0
P78362;Q9UPE1	SRPK2	0	0	2	0	0	2	0	0	1	0	0	0	1	0	0	0	0	0	0	0	0	0	0	0	0	0	0	0	0	0
P78371	CCT2	23	3	22	0	4	21	8	23	20	4	7	10	11	4	1	1480300000	53834000	1061300000	0	96534000	1704900000	244740000	704070000	747670000	110500000	336390000	283520000	404700000	83974000	0
P78406	RAE1	3	0	2	0	0	2	0	2	1	0	1	0	1	0	0	32239000	0	21643000	0	0	0	0	0	0	0	0	0	0	0	0
P78417	GSTO1	2	0	1	0	0	0	0	0	0	0	1	1	0	0	0	35883000	0	0	0	0	0	0	0	0	0	0	0	0	0	0
P78563	ADARB1	0	0	0	0	0	1	0	1	1	0	0	0	0	0	0	0	0	0	0	0	0	0	4822900	0	0	0	0	0	0	0
P80188	LCN2	0	4	2	0	0	0	2	0	1	1	0	6	0	0	0	0	198680000	40435000	0	0	0	92679000	0	0	0	0	530550000	0	0	0
P80217	IFI35	1	0	1	0	0	0	0	0	0	0	0	0	0	0	0	0	0	0	0	0	0	0	0	0	0	0	0	0	0	0
P80303	NUCB2	0	0	1	0	0	1	0	0	0	0	0	0	1	0	0	0	0	0	0	0	19622000	0	0	0	0	0	0	0	0	0
P80723	BASP1	1	2	6	0	0	4	0	4	2	0	2	0	2	0	0	0	29130000	43742000	0	0	58364000	0	29270000	43423000	0	72356000	0	28598000	0	0
P82650	MRPS22	4	0	2	0	0	5	0	2	2	0	2	0	1	0	0	44425000	0	29958000	0	0	40116000	0	0	0	0	79320000	0	0	0	0
P82673	MRPS35	2	0	0	0	0	3	0	1	1	0	2	0	1	0	0	0	0	0	0	0	14716000	0	0	0	0	0	0	0	0	0
P82675	MRPS5	0	0	0	0	0	1	0	0	1	1	1	0	0	0	0	0	0	0	0	0	0	0	0	0	0	24172000	0	0	0	0
P82909	MRPS36	3	0	2	0	0	2	0	1	0	0	3	0	0	0	0	0	0	0	0	0	45221000	0	0	0	0	60232000	0	0	0	0
P82930	MRPS34	2	0	2	0	0	3	0	3	2	0	2	0	2	0	0	11810000	0	0	0	0	27249000	0	16737000	17319000	0	27820000	0	0	0	0
P82933	MRPS9	1	0	0	0	0	2	0	1	1	0	0	0	2	0	0	0	0	0	0	0	0	0	0	0	0	0	0	9749900	0	0
P83916	CBX1	0	0	2	0	1	1	0	2	1	1	0	0	3	0	0	0	0	0	0	0	0	0	0	0	0	0	0	77455000	0	0
P84085	ARF5	5	1	6	1	2	7	4	7	7	3	3	5	5	5	3	0	0	0	0	0	0	0	28265000	0	0	0	0	0	0	0
P84090	ERH	1	0	3	0	3	1	1	2	1	1	1	0	3	2	1	0	0	20981000	0	81661000	0	0	66221000	0	0	0	0	36102000	49129000	0
P84095	RHOG	3	1	4	0	2	4	1	2	2	1	2	2	0	0	1	0	0	20614000	0	0	0	0	0	0	0	0	0	0	0	0
P85037	FOXK1	0	0	1	0	0	1	0	1	1	0	0	0	3	0	0	0	0	0	0	0	0	0	0	0	0	0	0	17195000	0	0
P98082	DAB2	0	0	0	0	0	0	0	0	0	0	0	0	0	0	0	0	0	0	0	0	0	0	0	0	0	0	0	0	0	0
P98172	EFNB1	3	0	2	0	0	4	0	1	2	0	2	0	1	0	0	29104000	0	19867000	0	0	32700000	0	0	30676000	0	26862000	0	0	0	0
P98175	RBM10	4	0	0	0	0	3	0	7	4	5	1	0	3	3	0	49958000	0	0	0	0	41462000	0	43883000	33402000	67950000	0	0	28133000	31357000	0
Q00169	PITPNA	1	0	1	0	0	2	0	0	0	0	1	0	0	0	0	0	0	0	0	0	16567000	0	0	0	0	0	0	0	0	0
Q00535;Q00534;Q96Q40;O94921;Q07002;Q00537;Q14004	CDK5	6	1	3	1	2	5	1	5	5	1	5	0	2	0	0	60031000	0	31868000	0	0	62666000	0	34345000	34962000	0	46536000	0	26256000	0	0
Q00577	PURA	1	1	4	0	1	3	0	4	2	1	1	1	2	1	1	0	0	55330000	0	0	58269000	0	54959000	0	0	0	0	70482000	0	0
Q00653	NFKB2	1	0	0	0	0	1	0	0	0	0	0	0	0	0	0	0	0	0	0	0	0	0	0	0	0	0	0	0	0	0
Q00688	FKBP3	8	0	9	2	5	9	2	8	8	1	6	1	4	5	1	349880000	0	227690000	85030000	121610000	385270000	98896000	178190000	182310000	0	334950000	0	171690000	162200000	0
Q00765	REEP5	1	0	2	0	0	2	0	0	0	0	0	0	0	0	0	0	0	15251000	0	0	0	0	0	0	0	0	0	0	0	0
Q00796	SORD	6	0	6	0	2	9	4	8	8	3	5	4	6	4	1	137440000	0	92346000	0	30263000	174240000	57350000	152130000	148200000	92754000	124690000	93667000	86946000	58169000	0
Q00872	MYBPC1	0	0	0	0	0	0	0	0	0	0	0	0	0	0	0	0	0	0	0	0	0	0	0	0	0	0	0	0	0	0
Q00978;Q9P2G4	IRF9;MAP10	1	0	0	0	0	1	0	0	0	0	0	0	0	0	0	0	0	0	0	0	0	0	0	0	0	0	0	0	0	0
Q01085	TIAL1	3	1	7	0	2	4	2	4	4	4	1	1	3	1	3	0	0	29961000	0	0	38382000	0	0	0	0	0	0	0	0	0
Q01518	CAP1	11	4	12	4	4	10	8	11	9	4	3	9	5	1	1	336690000	213600000	378870000	291350000	201790000	240390000	289070000	392480000	421000000	184070000	201880000	427110000	140990000	0	0
Q01546	KRT76	9	18	15	13	26	4	15	16	16	15	4	17	15	15	15	0	0	0	0	370620000	0	0	0	0	0	0	0	0	0	0
Q01581;P54868	HMGCS1	0	0	0	0	0	1	0	1	0	0	0	11	0	0	0	0	0	0	0	0	0	0	0	0	0	0	882260000	0	0	0
Q01628	IFITM3	3	2	3	0	2	1	1	1	1	1	2	0	1	1	0	531380000	117170000	373790000	0	150860000	0	0	0	0	0	94210000	0	0	0	0
Q01650;Q9UM01	SLC7A5	1	0	1	0	0	2	0	1	2	0	2	0	3	1	1	0	0	0	0	0	18043000	0	0	0	0	28962000	0	23206000	0	0
Q01658	DR1	0	0	0	0	0	3	0	0	0	0	1	0	0	0	0	0	0	0	0	0	16278000	0	0	0	0	0	0	0	0	0
Q01780	EXOSC10	1	0	1	0	0	2	0	4	3	2	0	0	2	0	0	0	0	0	0	0	0	0	24676000	19365000	26159000	0	0	0	0	0
Q01804	OTUD4	0	0	0	0	0	0	0	0	0	0	0	0	0	0	0	0	0	0	0	0	0	0	0	0	0	0	0	0	0	0
Q01813	PFKP	10	0	10	0	1	9	1	7	5	0	4	2	1	0	0	79370000	0	68857000	0	0	62302000	0	50664000	35339000	0	45119000	0	0	0	0
Q01831	XPC	0	0	1	0	0	0	0	1	0	0	0	0	0	0	0	0	0	0	0	0	0	0	9125800	0	0	0	0	0	0	0
Q01968	OCRL	4	0	2	0	0	3	0	1	1	0	0	0	0	0	0	20183000	0	14627000	0	0	15378000	0	0	0	0	0	0	0	0	0
Q01970	PLCB3	4	0	2	0	0	4	0	1	1	0	2	1	1	0	0	17493000	0	0	0	0	18788000	0	0	0	0	18441000	0	0	0	0
Q02218;Q9ULD0	OGDH	12	0	13	0	0	22	2	12	10	1	8	4	14	2	1	195700000	0	191980000	0	0	236650000	38461000	131820000	117720000	0	113050000	37324000	190220000	29586000	0
Q02252	ALDH6A1	4	1	2	0	1	1	0	0	0	0	1	1	1	0	0	0	0	0	0	0	0	0	0	0	0	0	0	0	0	0
Q02318	CYP27A1	2	0	1	0	0	0	0	0	0	0	0	0	0	0	0	0	0	5739100	0	0	0	0	0	0	0	0	0	0	0	0
Q02487	DSC2	1	1	4	0	1	0	1	1	0	0	0	2	0	0	0	0	0	9104700	0	0	0	0	0	0	0	0	0	0	0	0
Q02790	FKBP4	14	0	11	0	0	9	3	6	8	0	3	3	5	0	0	220180000	0	150520000	0	0	188810000	52606000	109680000	119920000	0	51937000	52445000	45510000	0	0
Q02809	PLOD1	10	1	12	0	5	9	0	8	6	0	3	0	9	3	0	100800000	0	103940000	0	52555000	80851000	0	107270000	79990000	0	63875000	0	87909000	60409000	0
Q02818	NUCB1	1	0	4	0	0	3	0	0	0	0	2	0	0	0	0	0	0	24261000	0	0	22142000	0	0	0	0	0	0	0	0	0
Q02880	TOP2B	10	0	9	0	0	12	6	22	16	9	7	1	14	1	0	156590000	0	99100000	0	0	147590000	74812000	318240000	215370000	193350000	136760000	0	233640000	0	0
Q02952	AKAP12	8	0	9	0	0	14	0	5	3	0	8	0	4	0	0	73484000	0	77864000	0	0	152910000	0	42367000	37937000	0	116320000	0	49568000	0	0
Q02978	SLC25A11	7	0	8	0	0	9	2	6	8	1	4	4	6	2	0	138370000	0	143430000	0	0	213040000	41511000	118420000	121620000	0	151340000	81349000	165460000	23771000	0
Q03001	DST	0	0	0	0	1	0	0	0	0	0	0	1	0	0	0	0	0	0	0	38436000	0	0	0	0	0	0	0	0	0	0
Q03135;P56539	CAV1	3	2	4	1	3	5	0	2	2	0	0	0	4	0	0	257560000	76023000	169590000	0	91146000	198880000	0	63848000	0	0	0	0	82729000	0	0
Q03426	MVK	0	0	1	0	0	0	0	0	0	0	0	0	0	0	0	0	0	3283600	0	0	0	0	0	0	0	0	0	0	0	0
Q03518	TAP1	2	0	4	0	0	1	0	0	0	0	0	0	0	0	0	92853000	0	0	0	0	0	0	0	0	0	0	0	0	0	0
Q03519	TAP2	2	0	4	0	0	1	0	1	0	0	0	0	1	0	0	0	0	0	0	0	0	0	0	0	0	0	0	0	0	0
Q03701	CEBPZ	0	0	1	0	0	0	0	3	2	0	1	0	0	0	0	0	0	0	0	0	0	0	15114000	0	0	0	0	0	0	0
Q04118	PRB3	0	0	0	1	0	0	1	2	1	1	0	1	0	0	1	0	0	0	0	0	0	0	58125000	0	0	0	0	0	0	0
Q04206	RELA	3	0	1	0	1	3	1	2	1	1	1	1	1	1	0	0	0	0	0	0	0	0	0	0	0	0	0	0	0	0
Q04323	UBXN1	1	1	3	0	1	2	1	2	1	1	0	1	1	1	1	0	0	0	0	0	0	0	0	0	0	0	0	52468000	0	0
Q04446	GBE1	9	0	9	0	1	12	1	7	3	1	4	1	4	2	0	209860000	0	209910000	0	0	225460000	0	139220000	93597000	0	119050000	0	80404000	59000000	0
Q04760	GLO1	3	0	3	0	2	3	1	1	1	0	1	5	1	1	1	68132000	0	63927000	0	28599000	49684000	0	0	0	0	0	52893000	0	0	0
Q04912	MST1R	1	0	0	0	0	2	0	0	0	0	1	0	1	0	0	0	0	0	0	0	7948000	0	0	0	0	0	0	0	0	0
Q04917	YWHAH	3	1	6	2	2	8	2	3	2	2	4	4	3	3	2	0	0	48183000	0	0	52136000	0	0	0	0	53717000	0	0	0	0
Q04941	PLP2	2	0	2	1	1	1	1	2	1	1	1	1	1	1	1	156500000	0	149380000	0	0	0	0	88916000	0	0	0	0	0	0	0
Q05048	CSTF1	5	0	2	0	0	2	1	3	0	3	1	0	2	0	0	43892000	0	0	0	0	41848000	0	35038000	0	47926000	0	0	0	0	0
Q05086	UBE3A	2	0	2	0	0	3	0	0	0	0	0	0	0	0	0	0	0	8766900	0	0	0	0	0	0	0	0	0	0	0	0
Q05209	PTPN12	1	0	0	0	0	1	0	0	0	0	0	0	0	0	0	0	0	0	0	0	0	0	0	0	0	0	0	0	0	0
Q05397;Q14289	PTK2	9	0	7	0	0	4	1	4	4	0	5	0	2	1	0	123430000	0	55423000	0	0	43517000	0	35313000	20768000	0	39653000	0	69183000	0	0
Q05682	CALD1	2	0	1	0	0	2	0	0	0	0	1	0	0	0	0	13004000	0	0	0	0	15006000	0	0	0	0	0	0	0	0	0
Q05D32	CTDSPL2	0	0	0	0	0	0	2	3	3	0	0	0	1	0	0	0	0	0	0	0	0	28859000	23702000	22625000	0	0	0	0	0	0
Q06124	PTPN11	5	0	2	0	0	5	0	2	3	0	1	0	2	0	0	36454000	0	27869000	0	0	36918000	0	31305000	21218000	0	0	0	25946000	0	0
Q06136	KDSR	0	0	0	0	0	2	0	1	0	0	2	0	2	1	0	0	0	0	0	0	11892000	0	0	0	0	14775000	0	0	0	0
Q06203	PPAT	0	0	0	0	0	2	0	0	0	0	0	0	0	0	0	0	0	0	0	0	10474000	0	0	0	0	0	0	0	0	0
Q06210;O94808	GFPT1	14	2	8	0	2	15	2	12	8	3	12	3	6	3	1	274690000	16668000	128100000	0	12849000	184120000	15691000	197320000	150370000	14587000	328990000	35978000	94203000	63065000	0
Q06265	EXOSC9	2	0	1	0	0	3	1	3	3	1	1	0	1	0	0	19727000	0	0	0	0	26890000	0	45688000	30457000	0	0	0	0	0	0
Q06323	PSME1	9	2	11	1	1	8	0	4	4	0	4	6	1	0	0	320160000	47632000	245870000	0	0	195050000	0	64109000	73520000	0	157730000	229590000	0	0	0
Q06330	RBPJ	1	0	0	0	0	0	0	0	0	0	0	0	0	0	0	0	0	0	0	0	0	0	0	0	0	0	0	0	0	0
Q06481	APLP2	3	0	5	0	0	1	0	0	1	0	3	0	0	0	0	0	0	28401000	0	0	0	0	0	0	0	57347000	0	0	0	0
Q06587;Q99496	RING1	2	0	3	0	0	2	0	3	2	0	3	0	1	1	0	29993000	0	17251000	0	0	33955000	0	22069000	21512000	0	45116000	0	0	0	0
Q06787	FMR1	1	1	2	0	1	4	0	2	2	1	1	0	2	1	0	0	0	0	0	0	0	0	7791200	0	0	0	0	5284300	0	0
Q07021	C1QBP	2	0	2	0	0	4	0	2	1	0	2	3	2	2	0	30492000	0	46075000	0	0	161730000	0	53116000	0	0	90262000	173160000	70406000	59884000	0
Q07157	TJP1	6	0	10	0	0	11	0	7	6	1	1	2	3	0	1	33504000	0	51269000	0	0	75167000	0	54739000	33203000	0	0	24208000	33442000	0	0
Q07812	BAX	0	0	0	0	0	1	0	0	0	0	1	0	0	0	0	0	0	0	0	0	0	0	0	0	0	6757900	0	0	0	0
Q07817	BCL2L1	2	0	2	0	0	1	0	1	0	0	2	0	1	0	0	32563000	0	0	0	0	0	0	0	0	0	54409000	0	0	0	0
Q07866;Q9NSK0	KLC1	5	0	7	0	0	10	0	6	4	0	5	0	3	0	0	42356000	0	49832000	0	0	76394000	0	52041000	49258000	0	50715000	0	41709000	0	0
Q07954	LRP1	3	0	2	0	0	5	0	2	0	0	8	0	2	1	0	20522000	0	0	0	0	0	0	0	0	0	71850000	0	0	0	0
Q07960	ARHGAP1	7	1	4	1	0	6	0	3	3	1	3	3	4	0	0	113770000	0	47965000	0	0	80148000	0	31370000	79266000	0	79701000	91291000	50962000	0	0
Q08043	ACTN3	8	4	9	2	5	8	5	9	8	4	6	5	8	5	4	0	0	0	0	0	0	0	0	0	0	0	0	0	0	0
Q08170	SRSF4	1	1	3	3	8	1	2	6	6	10	1	1	4	4	3	0	0	0	0	88723000	0	0	0	41146000	58082000	0	0	0	0	0
Q08209;P48454	PPP3CA	1	0	4	0	0	1	2	1	2	0	0	2	2	2	1	0	0	30507000	0	0	0	17735000	0	30340000	0	0	47303000	26108000	0	0
Q08257	CRYZ	7	0	2	0	0	8	0	3	2	0	4	2	2	0	0	60072000	0	30211000	0	0	115020000	0	44292000	36525000	0	79042000	0	63664000	0	0
Q08378	GOLGA3	6	0	7	0	0	8	0	6	2	0	3	0	7	0	0	26343000	0	34692000	0	0	36731000	0	35040000	0	0	36315000	0	53488000	0	0
Q08379	GOLGA2	1	0	0	0	0	3	0	0	0	0	0	1	1	0	0	0	0	0	0	0	16855000	0	0	0	0	0	0	0	0	0
Q08380	LGALS3BP	12	1	12	0	6	2	0	2	3	0	7	1	5	0	0	534580000	0	401920000	0	158170000	41924000	0	26829000	31523000	0	159720000	0	64618000	0	0
Q08426	EHHADH	2	0	1	0	0	1	0	1	0	0	1	0	1	0	0	20059000	0	0	0	0	0	0	0	0	0	0	0	0	0	0
Q08431	MFGE8	1	0	0	0	0	0	0	0	0	0	0	0	0	0	0	0	0	0	0	0	0	0	0	0	0	0	0	0	0	0
Q08722	CD47	2	2	2	0	2	2	1	2	2	1	2	0	2	1	0	117050000	156390000	106090000	0	53457000	80410000	0	81406000	111300000	0	0	0	114690000	0	0
Q08752	PPID	1	0	1	0	0	2	0	1	1	0	0	0	0	0	0	0	0	0	0	0	0	0	0	0	0	0	0	0	0	0
Q08AE8	SPIRE1	0	0	0	0	0	0	0	0	0	0	0	0	0	0	0	0	0	0	0	0	0	0	0	0	0	0	0	0	0	0
Q08AF3	SLFN5	2	0	2	0	1	0	0	0	0	0	1	0	0	0	0	0	0	12695000	0	0	0	0	0	0	0	0	0	0	0	0
Q08AM6	VAC14	0	0	1	0	0	2	0	1	0	0	0	0	0	0	0	0	0	0	0	0	9860300	0	0	0	0	0	0	0	0	0
Q08J23	NSUN2	14	0	11	1	4	15	4	18	11	6	5	1	9	2	1	204750000	0	149780000	0	56719000	183170000	100960000	260310000	160630000	115120000	94052000	0	133070000	34307000	0
Q09028	RBBP4	1	0	5	0	0	11	2	4	4	2	4	1	3	1	1	0	0	85632000	0	0	116400000	0	0	0	0	0	0	0	0	0
Q09328	MGAT5	1	0	0	0	0	1	0	0	0	0	2	0	0	0	0	0	0	0	0	0	13383000	0	0	0	0	0	0	0	0	0
Q09428	ABCC8	0	1	1	0	0	0	0	0	0	0	0	0	0	0	0	0	75686000	0	0	0	0	0	0	0	0	0	0	0	0	0
Q0VDD8	DNAH14	0	0	1	0	1	0	0	0	0	0	0	0	0	0	0	0	0	0	0	14295000	0	0	0	0	0	0	0	0	0	0
Q0VDF9	HSPA14	0	0	0	0	0	2	0	2	2	0	1	0	0	0	0	0	0	0	0	0	15881000	0	0	10568000	0	0	0	0	0	0
Q0VF96	CGNL1	0	1	0	1	0	0	0	0	0	0	0	0	0	0	0	0	0	0	0	0	0	0	0	0	0	0	0	0	0	0
Q0VGL1	LAMTOR4	1	0	0	0	0	1	0	0	0	0	0	0	0	0	0	0	0	0	0	0	24606000	0	0	0	0	0	0	0	0	0
Q10469	MGAT2	1	0	0	0	0	1	0	0	0	0	0	0	0	0	0	0	0	0	0	0	0	0	0	0	0	0	0	0	0	0
Q10471	GALNT2	7	0	6	0	0	6	1	3	3	0	2	0	3	0	0	78281000	0	52487000	0	0	58837000	0	66630000	74501000	0	53858000	0	0	0	0
Q10567	AP1B1	14	4	17	1	5	17	7	19	18	5	9	8	17	4	1	93204000	0	107750000	0	0	139780000	0	128320000	111390000	0	102750000	112630000	104310000	0	0
Q10570	CPSF1	3	0	2	0	0	5	1	9	5	4	4	0	5	1	0	22750000	0	12734000	0	0	32148000	0	57004000	35389000	45704000	32738000	0	36103000	0	0
Q10589	BST2	1	0	3	0	0	0	0	0	0	0	0	0	0	0	0	0	0	16910000	0	0	0	0	0	0	0	0	0	0	0	0
Q10713	PMPCA	2	0	7	0	0	7	0	6	4	0	4	1	3	1	0	47545000	0	64311000	0	0	87940000	0	72165000	66963000	0	77835000	0	63850000	0	0
Q11201;Q16842	ST3GAL1	3	0	2	0	0	2	0	1	1	0	3	0	2	0	0	0	0	0	0	0	0	0	0	0	0	183920000	0	0	0	0
Q12765	SCRN1	0	0	0	0	0	0	0	0	1	0	0	0	0	0	0	0	0	0	0	0	0	0	0	0	0	0	0	0	0	0
Q12768	KIAA0196	6	0	2	0	0	5	0	2	2	0	2	0	1	0	0	28541000	0	22075000	0	0	24678000	0	0	0	0	0	0	0	0	0
Q12769	NUP160	5	0	3	0	0	6	2	6	4	1	2	1	4	0	0	92441000	0	42944000	0	0	53509000	23736000	36940000	45907000	0	0	0	27908000	0	0
Q12788	TBL3	5	0	6	0	0	8	2	6	4	1	1	0	3	1	0	31770000	0	30242000	0	0	34703000	0	57535000	40722000	0	0	0	49366000	0	0
Q12791	KCNMA1	1	0	1	0	0	2	0	2	2	0	0	0	1	0	0	0	0	0	0	0	0	0	19106000	17306000	0	0	0	0	0	0
Q12792	TWF1	5	1	1	0	1	3	1	5	3	0	1	4	3	2	1	49744000	0	0	0	0	48923000	0	52005000	41880000	0	0	95399000	62962000	35824000	0
Q12824	SMARCB1	1	0	1	0	0	1	0	1	1	0	0	1	1	0	0	0	0	0	0	0	0	0	22897000	0	0	0	0	0	0	0
Q12830	BPTF	0	1	1	0	1	0	0	2	0	1	0	0	1	0	0	0	0	0	0	0	0	0	16499000	0	0	0	0	0	0	0
Q12846	STX4	2	0	1	0	0	1	0	0	0	0	0	0	0	0	0	0	0	0	0	0	0	0	0	0	0	0	0	0	0	0
Q12849	GRSF1	3	0	4	0	1	7	1	2	1	1	5	0	3	0	1	62732000	0	49398000	0	0	81661000	0	69131000	0	0	74539000	0	63453000	0	0
Q12872	SFSWAP	2	0	0	0	0	1	0	6	3	4	0	0	2	0	1	0	0	0	0	0	0	0	44808000	43048000	59503000	0	0	40149000	0	0
Q12873	CHD3	0	1	2	1	1	3	2	7	3	1	0	1	3	1	1	0	0	0	0	0	0	0	0	0	0	0	0	0	0	0
Q12888	TP53BP1	8	0	7	0	0	9	0	8	3	0	8	0	5	0	0	63329000	0	61363000	0	0	72413000	0	72288000	25425000	0	91342000	0	69295000	0	0
Q12893	TMEM115	1	0	1	0	0	0	0	1	0	0	0	0	0	0	0	7846300	0	0	0	0	0	0	0	0	0	0	0	0	0	0
Q12899	TRIM26	0	0	1	0	0	1	0	1	1	0	0	0	0	0	0	0	0	3714800	0	0	0	0	0	0	0	0	0	0	0	0
Q12904	AIMP1	8	0	7	0	0	8	1	5	4	1	5	2	6	1	0	132170000	0	73866000	0	0	133860000	0	75933000	82889000	0	147320000	78006000	74802000	0	0
Q12907	LMAN2	10	1	11	1	6	10	3	9	5	2	6	3	9	6	2	316630000	0	271160000	0	105820000	387530000	94832000	251460000	205690000	53860000	398060000	105730000	230130000	133460000	0
Q12913	PTPRJ	0	0	0	0	0	0	0	0	0	0	0	0	0	0	0	0	0	0	0	0	0	0	0	0	0	0	0	0	0	0
Q12955	ANK3	2	0	0	0	0	2	0	1	0	0	3	0	0	0	0	0	0	0	0	0	0	0	0	0	0	0	0	0	0	0
Q12959	DLG1	2	0	2	0	0	6	0	1	0	0	1	0	2	0	0	13793000	0	8878400	0	0	0	0	0	0	0	0	0	0	0	0
Q12965;O00160	MYO1E	0	0	4	0	0	3	1	3	2	0	0	3	0	0	0	0	0	27773000	0	0	0	0	0	0	0	0	0	0	0	0
Q12972	PPP1R8	2	0	1	0	0	3	0	1	0	0	0	0	0	0	0	25782000	0	0	0	0	22768000	0	0	0	0	0	0	0	0	0
Q12974;Q93096	PTP4A2;PTP4A1	1	0	0	0	0	2	0	1	0	0	2	0	1	0	0	0	0	0	0	0	21972000	0	0	0	0	36274000	0	0	0	0
Q12996	CSTF3	5	0	3	0	1	3	0	6	3	3	3	3	5	2	1	18469000	0	20985000	0	0	29002000	0	42230000	55155000	46707000	31450000	0	49029000	0	0
Q13011	ECH1	6	1	6	0	2	7	2	5	4	0	5	3	6	1	1	231900000	0	176970000	0	136300000	269310000	80308000	104850000	140310000	0	271100000	153720000	222270000	0	0
Q13017	ARHGAP5	2	0	3	0	0	1	0	1	0	1	0	0	0	0	0	0	0	0	0	0	0	0	0	0	0	0	0	0	0	0
Q13033	STRN3	1	0	5	0	0	4	0	3	5	0	3	0	1	0	0	0	0	48270000	0	0	57132000	0	44437000	40106000	0	47799000	0	0	0	0
Q13043;Q13188	STK4;STK3	0	0	0	0	0	1	0	0	0	0	0	0	0	0	0	0	0	0	0	0	3958200	0	0	0	0	0	0	0	0	0
Q13045	FLII	10	0	9	0	0	14	1	6	4	1	0	1	2	0	0	162430000	0	97562000	0	0	145600000	0	35760000	35566000	0	0	0	18145000	0	0
Q13084	MRPL28	0	0	0	0	0	2	0	1	1	0	1	0	2	0	0	0	0	0	0	0	32281000	0	0	0	0	0	0	0	0	0
Q13098	GPS1	3	0	6	0	0	7	0	7	5	0	1	1	3	1	0	57452000	0	34330000	0	0	61043000	0	52143000	49586000	0	0	0	31496000	0	0
Q13107	USP4	3	0	1	0	0	2	0	0	1	0	0	0	1	0	0	4371200	0	0	0	0	0	0	0	0	0	0	0	0	0	0
Q13123	IK	3	0	4	0	0	2	0	4	2	3	1	0	2	0	1	26902000	0	21459000	0	0	39816000	0	47311000	25407000	57529000	0	0	24792000	0	0
Q13126	MTAP	4	1	6	0	1	3	0	1	1	0	2	2	2	0	0	140710000	0	148790000	0	0	79568000	0	0	0	0	62283000	28222000	0	0	0
Q13131;P54646	PRKAA1	6	0	4	0	1	4	0	1	2	0	2	0	3	1	1	32336000	0	46889000	0	0	0	0	0	31467000	0	0	0	44038000	0	0
Q13136;O75145;O75334	PPFIA1	0	0	1	0	0	0	0	0	0	0	1	0	0	0	0	0	0	0	0	0	0	0	0	0	0	0	0	0	0	0
Q13137	CALCOCO2	1	0	2	0	0	0	0	0	0	0	0	0	0	0	0	8573800	0	0	0	0	0	0	0	0	0	0	0	0	0	0
Q13144	EIF2B5	5	0	2	0	0	6	0	1	2	0	1	0	0	0	0	0	0	0	0	0	32912000	0	0	0	0	0	0	0	0	0
Q13155	AIMP2	4	0	3	0	0	5	0	1	2	0	1	1	1	0	0	108990000	0	65674000	0	0	99888000	0	0	71754000	0	0	0	0	0	0
Q13177;O75914;Q13153	PAK2	2	0	4	0	0	4	0	3	3	0	1	0	2	0	0	41363000	0	35215000	0	0	29748000	0	0	30710000	0	0	0	0	0	0
Q13185	CBX3	3	3	5	2	3	4	1	5	2	2	3	0	4	1	2	86737000	99701000	115850000	94563000	73027000	152110000	0	129440000	121650000	86661000	158730000	0	99516000	0	0
Q13190	STX5	4	0	2	0	0	3	0	3	3	0	2	1	3	0	0	0	0	0	0	0	46927000	0	30831000	47658000	0	0	0	57818000	0	0
Q13200	PSMD2	18	3	22	0	4	23	7	17	16	5	10	8	12	1	0	635230000	55084000	541620000	0	39869000	705960000	162990000	389240000	403700000	84313000	424460000	260260000	222150000	0	0
Q13206	DDX10	0	0	0	0	0	0	0	4	0	0	0	0	0	0	0	0	0	0	0	0	0	0	20991000	0	0	0	0	0	0	0
Q13217	DNAJC3	1	0	2	0	0	2	0	0	0	0	0	0	0	0	0	0	0	0	0	0	0	0	0	0	0	0	0	0	0	0
Q13232	NME3	3	0	1	0	0	2	0	1	0	0	3	1	1	0	0	24126000	0	0	0	0	23018000	0	0	0	0	43839000	0	0	0	0
Q13286	CLN3	1	0	0	0	0	1	0	0	0	0	1	0	0	0	0	0	0	0	0	0	11446000	0	0	0	0	0	0	0	0	0
Q13287	NMI	1	1	5	0	1	0	0	0	0	0	0	0	0	0	0	0	0	33522000	0	0	0	0	0	0	0	0	0	0	0	0
Q13308	PTK7	1	0	3	0	0	3	0	1	1	0	1	0	1	0	0	0	0	0	0	0	24940000	0	0	0	0	0	0	0	0	0
Q13310;P0CB38	PABPC4	15	4	10	1	7	16	5	14	15	10	6	6	10	7	7	80917000	0	71255000	0	0	82586000	0	82635000	83330000	53536000	0	0	73882000	0	0
Q13315	ATM	0	0	0	0	0	2	0	2	1	0	0	0	1	0	0	0	0	0	0	0	0	0	10154000	0	0	0	0	0	0	0
Q13330	MTA1	1	0	2	0	0	1	0	3	2	0	1	0	3	0	0	0	0	12249000	0	0	0	0	15020000	11624000	0	0	0	17347000	0	0
Q13332;P23468;P10586	PTPRS	0	0	1	1	0	1	0	2	0	0	2	0	1	1	0	0	0	0	0	0	0	0	0	0	0	0	0	5095200	0	0
Q13347	EIF3I	6	1	10	0	1	9	2	9	4	3	2	2	5	3	0	72895000	0	241600000	0	0	306040000	67892000	248620000	130590000	48994000	65056000	64071000	146190000	44081000	0
Q13363	CTBP1	5	0	5	0	1	8	1	3	3	1	4	1	2	1	1	43896000	0	29648000	0	0	33834000	0	24368000	30562000	0	36821000	0	0	0	0
Q13393	PLD1	0	0	1	0	0	1	0	0	0	0	1	0	1	0	0	0	0	0	0	0	0	0	0	0	0	12202000	0	0	0	0
Q13404	UBE2V1	2	1	2	1	1	1	0	1	1	1	2	2	1	1	0	0	0	38591000	0	0	0	0	0	0	0	0	0	0	0	0
Q13405	MRPL49	2	0	1	0	0	2	0	1	1	0	1	0	1	0	0	10114000	0	0	0	0	12182000	0	0	0	0	0	0	0	0	0
Q13409	DYNC1I2	7	2	10	0	3	9	3	10	4	1	4	2	6	4	0	122690000	87911000	178680000	0	145270000	144240000	154050000	228260000	144080000	0	132140000	125100000	186670000	68653000	0
Q13410	BTN1A1	0	0	0	0	0	0	0	0	0	0	0	0	0	0	0	0	0	0	0	0	0	0	0	0	0	0	0	0	0	0
Q13418	ILK	5	0	3	0	0	5	0	0	1	0	2	0	0	0	0	29915000	0	0	0	0	45686000	0	0	0	0	51228000	0	0	0	0
Q13423	NNT	6	0	7	0	0	5	0	10	6	1	6	1	6	2	0	72600000	0	68026000	0	0	59528000	0	92554000	83049000	0	98908000	0	131560000	56099000	0
Q13425;Q13884	SNTB2	5	0	4	0	0	7	0	3	3	1	2	0	4	0	0	61999000	0	47688000	0	0	87182000	0	44972000	50211000	0	41702000	0	46492000	0	0
Q13438	OS9	2	0	0	0	0	0	0	0	0	0	0	0	0	0	0	0	0	0	0	0	0	0	0	0	0	0	0	0	0	0
Q13439	GOLGA4	1	0	1	0	0	2	0	0	0	0	0	0	0	0	0	0	0	0	0	0	0	0	0	0	0	0	0	0	0	0
Q13442	PDAP1	4	1	5	1	2	5	2	5	5	1	3	0	4	1	1	102700000	0	101700000	0	70761000	127650000	0	104050000	104070000	0	157830000	0	86773000	0	0
Q13443	ADAM9	0	0	2	0	0	1	0	2	1	0	0	0	2	0	0	0	0	0	0	0	0	0	10013000	0	0	0	0	0	0	0
Q13444	ADAM15	0	0	0	0	0	0	0	0	0	0	0	0	0	0	0	0	0	0	0	0	0	0	0	0	0	0	0	0	0	0
Q13445	TMED1	2	0	2	0	0	1	0	0	0	0	1	0	0	0	0	24540000	0	0	0	0	0	0	0	0	0	0	0	0	0	0
Q13459	MYO9B	0	0	0	0	0	1	0	1	1	1	0	1	1	1	1	0	0	0	0	0	0	0	0	0	0	0	0	0	0	0
Q13464	ROCK1	3	0	4	0	0	2	0	0	1	0	1	0	1	0	0	0	0	0	0	0	0	0	0	0	0	0	0	0	0	0
Q13469	NFATC2	0	0	2	0	0	0	0	0	0	0	0	0	0	0	0	0	0	3663000	0	0	0	0	0	0	0	0	0	0	0	0
Q13488	TCIRG1	10	0	8	0	0	6	0	1	0	1	3	0	2	0	0	96145000	0	78103000	0	0	60615000	0	0	0	0	63078000	0	0	0	0
Q13492;O60641	PICALM	1	0	1	0	0	0	0	1	1	0	0	1	1	0	0	0	0	0	0	0	0	0	0	0	0	0	0	0	0	0
Q13501	SQSTM1	4	0	6	0	2	2	0	1	0	0	0	0	1	0	0	120950000	0	124960000	0	33834000	0	0	0	0	0	0	0	0	0	0
Q13505	MTX1	2	0	4	0	0	5	0	0	1	0	1	0	1	0	0	54472000	0	23916000	0	0	41680000	0	0	0	0	0	0	0	0	0
Q13509	TUBB3	22	9	17	5	11	19	12	14	16	10	10	12	13	12	9	588490000	0	161780000	0	0	320660000	55420000	85487000	120210000	0	66680000	88692000	57986000	33594000	0
Q13526	PIN1	5	0	4	0	1	4	0	4	3	3	1	0	4	1	0	104930000	0	76745000	0	0	203220000	0	107270000	85625000	95508000	0	0	72819000	0	0
Q13530	SERINC3	1	0	0	0	0	0	0	0	0	0	0	0	0	0	0	0	0	0	0	0	0	0	0	0	0	0	0	0	0	0
Q13546	RIPK1	0	0	0	0	0	1	0	0	0	0	0	0	0	0	0	0	0	0	0	0	0	0	0	0	0	0	0	0	0	0
Q13547;O15379	HDAC1	3	0	5	0	1	5	1	5	5	1	2	0	2	0	0	0	0	45797000	0	0	0	0	0	0	0	0	0	0	0	0
Q13554;Q9UQM7	CAMK2B	5	1	6	1	1	5	1	2	3	0	2	1	4	2	1	0	0	0	0	0	0	0	0	0	0	0	0	0	0	0
Q13555	CAMK2G	10	2	11	1	1	10	1	8	9	1	3	1	10	4	1	405000000	45197000	389000000	0	0	387400000	0	186190000	194330000	0	333560000	0	299890000	115360000	0
Q13557	CAMK2D	6	1	10	1	2	7	0	2	2	0	3	0	4	1	0	136930000	0	130650000	0	0	101510000	0	78468000	57918000	0	109460000	0	97117000	0	0
Q13561	DCTN2	10	0	10	0	2	13	1	6	6	0	6	6	6	0	0	229350000	0	267480000	0	20752000	282960000	0	114290000	121950000	0	224850000	89855000	114130000	0	0
Q13573	SNW1	0	0	3	1	1	3	3	6	3	4	1	0	3	2	1	0	0	31145000	0	0	34466000	67955000	108720000	83345000	124900000	0	0	75085000	63509000	0
Q13586;Q9P246	STIM1	3	0	2	0	0	4	0	2	1	1	4	0	2	0	0	0	0	0	0	0	14423000	0	0	0	0	41238000	0	34636000	0	0
Q13596	SNX1	5	0	6	0	0	4	0	1	1	0	1	0	2	0	0	36758000	0	30536000	0	0	0	0	0	0	0	0	0	33552000	0	0
Q13601	KRR1	6	0	3	0	0	4	1	5	3	3	3	0	5	0	0	80705000	0	74459000	0	0	62104000	0	63318000	58700000	49691000	67918000	0	57722000	0	0
Q13610	PWP1	2	0	1	0	0	2	0	2	1	0	1	0	0	0	0	14501000	0	0	0	0	0	0	0	0	0	0	0	0	0	0
Q13616	CUL1	4	0	2	0	0	6	1	5	5	0	3	0	3	0	0	28580000	0	24395000	0	0	46831000	0	39869000	26976000	0	28390000	0	26619000	0	0
Q13617	CUL2	15	4	14	1	4	10	1	16	12	7	3	0	8	3	1	335460000	24720000	256220000	0	48019000	202330000	0	271880000	230330000	67566000	56613000	0	110460000	38634000	0
Q13618	CUL3	2	0	0	0	0	3	0	1	3	0	0	2	2	1	0	0	0	0	0	0	20089000	0	0	17173000	0	0	19917000	8991000	0	0
Q13620	CUL4B	5	0	6	0	0	9	1	7	6	0	1	0	2	0	0	37292000	0	41584000	0	0	57075000	0	49521000	41146000	0	0	0	41705000	0	0
Q13630	TSTA3	4	0	5	0	0	4	0	2	1	0	1	5	1	0	0	58252000	0	54467000	0	0	56259000	0	46850000	0	0	0	117960000	0	0	0
Q13637	RAB32	3	0	2	0	0	2	0	1	2	0	3	1	1	0	0	21903000	0	13668000	0	0	0	0	0	0	0	0	0	0	0	0
Q13642	FHL1	2	1	6	1	1	6	1	4	3	1	3	1	4	1	0	64958000	0	69699000	0	0	131980000	0	92799000	107340000	0	119610000	0	86300000	0	0
Q13671	RIN1	0	0	0	0	0	3	0	0	2	0	0	0	0	0	0	0	0	0	0	0	13808000	0	0	0	0	0	0	0	0	0
Q13685	AAMP	0	0	0	0	0	2	0	0	0	0	0	0	0	0	0	0	0	0	0	0	0	0	0	0	0	0	0	0	0	0
Q13740	ALCAM	6	0	5	0	0	12	0	3	3	0	6	0	2	0	0	63128000	0	89880000	0	0	145110000	0	61646000	69071000	0	125800000	0	56909000	0	0
Q13753	LAMC2	0	2	1	1	2	0	0	0	0	0	0	0	0	0	0	0	0	0	0	15412000	0	0	0	0	0	0	0	0	0	0
Q13769	THOC5	0	0	0	0	0	0	0	0	0	0	0	0	0	0	0	0	0	0	0	0	0	0	0	0	0	0	0	0	0	0
Q13868	EXOSC2	0	0	1	0	0	4	0	0	1	0	0	0	1	0	0	0	0	0	0	0	32562000	0	0	0	0	0	0	0	0	0
Q13895	BYSL	1	0	2	0	0	7	0	5	1	0	1	0	1	0	0	0	0	31858000	0	0	47609000	0	55861000	0	0	0	0	0	0	0
Q13907	IDI1	0	0	0	0	0	1	0	0	0	0	0	2	0	0	0	0	0	0	0	0	0	0	0	0	0	0	10243000	0	0	0
Q13948;P39880	CUX1	0	0	1	0	0	1	0	2	2	0	0	0	3	0	0	0	0	0	0	0	0	0	0	0	0	0	0	6707700	0	0
Q14008	CKAP5	12	0	11	0	2	15	1	11	8	1	4	1	5	0	0	121710000	0	105740000	0	38189000	120590000	0	76162000	79564000	0	44943000	0	80775000	0	0
Q14011	CIRBP	2	0	1	0	0	2	1	3	1	1	1	1	2	2	1	102110000	0	0	0	0	140970000	0	47474000	0	0	0	0	54290000	80594000	0
Q14019	COTL1	5	1	4	1	2	5	3	5	3	1	2	0	2	0	0	40244000	0	70875000	0	87198000	90635000	71128000	112090000	97958000	0	48027000	0	76070000	0	0
Q14061	COX17	0	0	0	0	0	0	0	1	1	0	1	0	1	0	0	0	0	0	0	0	0	0	8520100	0	0	0	0	0	0	0
Q14108	SCARB2	7	2	6	0	2	8	0	2	1	0	4	3	2	1	0	147220000	57170000	128740000	0	55712000	141610000	0	54947000	0	0	175280000	61919000	59413000	0	0
Q14118	DAG1	0	0	0	0	0	2	0	0	0	0	1	0	0	1	0	0	0	0	0	0	0	0	0	0	0	0	0	0	0	0
Q14126	DSG2	3	0	5	0	0	3	0	1	1	0	0	0	2	0	0	21600000	0	23414000	0	0	23498000	0	0	0	0	0	0	0	0	0
Q14134	TRIM29	0	1	0	0	0	0	4	0	0	0	0	16	0	0	1	0	0	0	0	0	0	79784000	0	0	0	0	1745500000	0	0	0
Q14137	BOP1	3	0	2	0	0	3	1	6	5	1	0	0	2	0	0	46069000	0	35848000	0	0	31483000	0	67500000	44688000	0	0	0	31959000	0	0
Q14139	UBE4A	2	0	2	0	0	1	0	0	0	0	0	0	0	0	0	17251000	0	0	0	0	0	0	0	0	0	0	0	0	0	0
Q14141	2017-09-06	4	1	5	0	1	5	1	3	2	1	2	0	3	1	0	0	0	55166000	0	0	0	0	0	0	0	0	0	0	0	0
Q14142	TRIM14	0	0	0	0	0	0	0	0	0	0	1	0	0	0	0	0	0	0	0	0	0	0	0	0	0	0	0	0	0	0
Q14145	KEAP1	1	0	0	0	0	1	0	0	0	0	0	0	0	0	0	0	0	0	0	0	0	0	0	0	0	0	0	0	0	0
Q14149	MORC3	0	0	0	0	0	1	0	1	1	0	0	0	1	0	0	0	0	0	0	0	0	0	5448200	0	0	0	0	0	0	0
Q14155;Q15052	ARHGEF7	0	0	2	0	0	0	0	0	0	0	0	0	0	0	0	0	0	5268800	0	0	0	0	0	0	0	0	0	0	0	0
Q14160;Q9BTT6	SCRIB	12	0	12	0	1	19	0	13	9	0	8	0	11	0	0	222330000	0	204440000	0	0	224500000	0	87222000	70450000	0	193500000	0	134690000	0	0
Q14161	GIT2	2	0	2	0	0	4	0	1	1	0	1	0	0	0	0	0	0	0	0	0	23665000	0	0	0	0	0	0	0	0	0
Q14166	TTLL12	3	0	1	0	0	1	0	1	0	0	0	2	0	0	0	0	0	0	0	0	0	0	0	0	0	0	0	0	0	0
Q14192	FHL2	1	0	2	0	0	1	0	0	0	0	1	0	0	0	0	0	0	0	0	0	0	0	0	0	0	0	0	0	0	0
Q14195	DPYSL3	1	0	3	0	0	1	0	0	1	0	0	0	1	0	0	0	0	0	0	0	0	0	0	0	0	0	0	0	0	0
Q14197	ICT1	1	0	0	0	0	0	0	0	0	0	0	0	0	0	0	11943000	0	0	0	0	0	0	0	0	0	0	0	0	0	0
Q14203	DCTN1	18	0	13	0	0	12	0	13	7	0	7	2	4	0	0	230720000	0	134880000	0	0	112810000	0	110670000	88554000	0	112230000	75790000	55004000	0	0
Q14232	EIF2B1	3	0	2	0	0	7	0	0	1	0	1	0	0	0	0	33726000	0	36599000	0	0	48545000	0	0	0	0	0	0	0	0	0
Q14240	EIF4A2	17	5	14	3	7	15	10	11	10	6	10	11	12	7	6	182300000	0	124170000	0	0	133970000	0	105750000	0	0	152250000	0	107120000	0	0
Q14254	FLOT2	12	0	7	0	1	7	0	4	1	1	3	0	3	0	0	92779000	0	74360000	0	0	46530000	0	0	0	0	30507000	0	0	0	0
Q14315	FLNC	48	9	63	5	19	59	25	65	52	21	32	9	45	23	6	814720000	27266000	1011900000	0	117450000	937490000	278500000	975120000	974610000	271840000	502110000	0	720380000	155990000	0
Q14318	FKBP8	6	0	4	0	0	6	0	1	0	0	4	0	1	0	0	81671000	0	87012000	0	0	105760000	0	0	0	0	100960000	0	0	0	0
Q14320;Q9Y247	FAM50A	3	0	1	0	1	2	1	3	1	2	2	0	1	1	0	0	0	0	0	0	0	0	51563000	0	44648000	43449000	0	0	0	0
Q14331	FRG1	0	0	0	0	0	0	0	0	0	1	0	0	0	0	0	0	0	0	0	0	0	0	0	0	0	0	0	0	0	0
Q14344	GNA13	3	0	3	0	0	4	0	1	0	0	2	0	0	0	0	23027000	0	0	0	0	34955000	0	0	0	0	0	0	0	0	0
Q14410	GK2	1	0	1	0	0	0	0	0	0	0	0	0	0	0	0	0	0	0	0	0	0	0	0	0	0	0	0	0	0	0
Q14457	BECN1	1	0	0	0	0	1	0	0	0	0	0	0	0	0	0	0	0	0	0	0	0	0	0	0	0	0	0	0	0	0
Q14527	HLTF	0	0	0	0	0	0	0	2	0	0	0	0	0	0	0	0	0	0	0	0	0	0	4444300	0	0	0	0	0	0	0
Q14554	PDIA5	2	0	3	0	0	4	0	1	0	0	3	0	0	0	0	32119000	0	25808000	0	0	25080000	0	0	0	0	35514000	0	0	0	0
Q14558	PRPSAP1	4	0	4	0	0	5	0	0	1	0	1	0	0	0	0	29686000	0	28839000	0	0	30175000	0	0	0	0	0	0	0	0	0
Q14562	DHX8	0	0	1	0	0	0	0	2	1	3	0	0	0	0	0	0	0	0	0	0	0	0	0	0	16623000	0	0	0	0	0
Q14566	MCM6	14	0	11	0	2	16	1	13	12	4	11	0	5	1	0	217660000	0	163900000	0	21475000	282370000	0	217730000	240460000	74539000	156250000	0	81454000	0	0
Q14573;Q14643;Q14571	ITPR3	17	0	15	0	0	7	0	5	1	0	8	0	5	1	0	210940000	0	102230000	0	0	34019000	0	26091000	0	0	81186000	0	42047000	0	0
Q14626	IL11RA	0	0	0	1	0	0	0	1	0	1	0	1	1	1	1	0	0	0	0	0	0	0	0	0	0	0	0	28691000	0	0
Q14651	PLS1	3	1	5	2	2	4	2	2	2	0	3	3	2	1	0	0	0	7722200	0	0	0	0	0	0	0	0	0	0	0	0
Q14653	IRF3	1	0	0	0	0	0	0	0	0	0	0	0	0	0	0	0	0	0	0	0	0	0	0	0	0	0	0	0	0	0
Q14657	LAGE3	1	0	1	0	0	1	0	1	0	0	1	0	0	0	0	0	0	0	0	0	7055000	0	0	0	0	0	0	0	0	0
Q14669	TRIP12	1	0	2	0	0	6	0	4	3	1	0	1	1	1	1	0	0	0	0	0	18370000	0	20359000	16363000	0	0	0	0	0	0
Q14671	PUM1	0	0	1	0	0	0	0	7	2	0	0	0	6	0	0	0	0	0	0	0	0	0	70895000	0	0	0	0	69848000	0	0
Q14676	MDC1	2	0	1	0	0	2	1	6	2	1	0	0	2	0	0	0	0	0	0	0	19557000	0	39463000	0	0	0	0	33522000	0	0
Q14677	CLINT1	5	0	4	0	0	5	1	3	4	0	4	2	1	1	0	42244000	0	64628000	0	0	59157000	0	58279000	48753000	0	71355000	65001000	0	0	0
Q14683	SMC1A	5	0	8	0	0	6	6	18	15	6	2	1	10	2	0	100870000	0	75047000	0	0	64872000	40341000	273860000	141210000	90605000	96393000	0	147840000	0	0
Q14684	RRP1B	3	0	4	0	0	0	0	7	2	0	0	0	1	0	0	46545000	0	33149000	0	0	0	0	72825000	39811000	0	0	0	0	0	0
Q14690	PDCD11	2	0	4	0	0	2	0	18	9	1	0	0	3	0	0	13927000	0	19043000	0	0	0	0	217720000	56107000	0	0	0	18755000	0	0
Q14692	BMS1	2	0	2	0	0	0	0	8	1	1	0	0	1	0	0	0	0	18473000	0	0	0	0	60222000	0	0	0	0	0	0	0
Q14694	USP10	3	0	5	0	1	6	0	10	6	2	3	0	4	0	0	42625000	0	42463000	0	0	53830000	0	62504000	54845000	34729000	46766000	0	39992000	0	0
Q14696	MESDC2	1	0	2	0	1	1	0	1	1	0	1	0	1	0	0	0	0	0	0	0	0	0	0	0	0	0	0	0	0	0
Q14728	MFSD10	0	0	0	0	0	1	1	1	1	1	0	1	2	1	0	0	0	0	0	0	0	0	0	0	0	0	0	12897000	0	0
Q14738;Q13362	PPP2R5D	3	0	3	0	0	2	0	2	3	0	0	0	0	0	0	33168000	0	0	0	0	32163000	0	29712000	23321000	0	0	0	0	0	0
Q14739	LBR	0	0	2	0	0	1	0	1	1	0	0	0	0	0	0	0	0	13711000	0	0	0	0	0	0	0	0	0	0	0	0
Q14746	COG2	0	0	1	0	0	0	0	0	0	0	0	0	0	0	0	0	0	0	0	0	0	0	0	0	0	0	0	0	0	0
Q14764	MVP	3	0	1	0	0	7	2	5	2	1	1	12	2	1	0	24856000	0	0	0	0	38317000	7814200	16085000	17212000	0	0	147100000	10861000	0	0
Q14789	GOLGB1	0	0	1	0	0	1	0	0	0	0	0	0	1	0	0	0	0	0	0	0	0	0	0	0	0	0	0	0	0	0
Q14790	CASP8	0	0	1	0	0	0	0	0	0	0	0	0	0	0	0	0	0	0	0	0	0	0	0	0	0	0	0	0	0	0
Q147X3	NAA30	1	0	0	0	0	1	0	0	0	0	0	0	0	0	0	0	0	0	0	0	0	0	0	0	0	0	0	0	0	0
Q14839	CHD4	5	0	10	2	0	10	1	18	11	1	3	0	9	0	0	59068000	0	80970000	0	0	125450000	0	230110000	159570000	0	60288000	0	121590000	0	0
Q14847	LASP1	5	2	9	1	4	3	1	7	7	2	1	1	4	3	0	146570000	0	285890000	0	119590000	105270000	0	191100000	187410000	60633000	0	0	97876000	68890000	0
Q14914	PTGR1	0	0	0	0	0	0	0	1	0	0	0	1	0	0	0	0	0	0	0	0	0	0	0	0	0	0	0	0	0	0
Q14919	DRAP1	1	0	1	1	0	2	1	2	1	1	0	1	1	1	1	0	0	0	0	0	34980000	0	20236000	0	0	0	0	0	0	0
Q14938;O00712	NFIX	6	0	3	0	0	6	0	7	5	0	2	0	5	2	0	53228000	0	80175000	0	0	80135000	0	90910000	85065000	0	70455000	0	73097000	0	0
Q14956	GPNMB	0	1	1	1	2	0	1	0	0	1	0	2	1	1	0	0	0	0	0	101730000	0	0	0	0	0	0	139650000	0	0	0
Q14964	RAB39A	2	1	1	1	1	1	1	1	1	1	1	1	1	1	1	0	0	0	0	0	0	0	0	0	0	0	0	0	0	0
Q14978	NOLC1	2	1	6	0	2	2	1	9	5	3	0	1	4	2	1	22858000	0	131140000	0	32734000	49572000	0	392220000	93791000	96125000	0	0	109270000	57976000	0
Q14BN4	SLMAP	0	0	0	0	0	0	0	0	0	0	0	0	0	0	0	0	0	0	0	0	0	0	0	0	0	0	0	0	0	0
Q14C86	GAPVD1	0	0	2	0	0	0	1	0	0	0	0	0	0	0	0	0	0	3629600	0	0	0	0	0	0	0	0	0	0	0	0
Q14CX7	NAA25	1	0	2	0	1	4	0	1	0	0	3	0	0	0	0	0	0	0	0	0	27039000	0	0	0	0	30911000	0	0	0	0
Q15003	NCAPH	0	0	1	0	0	3	0	1	0	0	0	0	0	0	0	0	0	0	0	0	30668000	0	0	0	0	0	0	0	0	0
Q15005	SPCS2	0	0	1	0	1	2	2	2	2	0	1	1	2	1	0	0	0	0	0	0	0	24267000	21881000	0	0	0	0	0	0	0
Q15006	EMC2	5	0	4	1	0	5	1	2	1	0	3	0	4	3	0	43235000	0	45067000	0	0	49321000	0	35082000	0	0	44123000	0	80573000	45362000	0
Q15007	WTAP	0	0	1	0	0	1	0	2	1	3	0	0	2	4	1	0	0	0	0	0	0	0	0	0	57530000	0	0	0	51626000	0
Q15008	PSMD6	9	0	11	1	2	7	0	5	6	0	5	6	3	0	0	153420000	0	110590000	0	0	125710000	0	54943000	52421000	0	83270000	111790000	47243000	0	0
Q15014	MORF4L2	0	0	0	0	0	0	0	0	0	0	0	0	0	0	0	0	0	0	0	0	0	0	0	0	0	0	0	0	0	0
Q15020	SART3	19	0	10	0	0	13	2	12	9	5	7	1	7	3	0	300160000	0	142090000	0	0	174140000	71326000	206300000	169890000	106910000	288540000	0	153600000	59981000	0
Q15021	NCAPD2	0	0	0	0	0	4	0	1	2	0	0	0	0	0	0	0	0	0	0	0	10960000	0	0	6501400	0	0	0	0	0	0
Q15024	EXOSC7	0	0	0	0	0	1	0	0	0	0	2	0	1	0	0	0	0	0	0	0	0	0	0	0	0	18686000	0	0	0	0
Q15027	ACAP1	0	0	0	0	0	0	0	0	0	0	0	0	0	0	0	0	0	0	0	0	0	0	0	0	0	0	0	0	0	0
Q15031	LARS2	5	0	9	0	1	4	0	2	1	0	3	0	5	0	0	42001000	0	70651000	0	0	34543000	0	40441000	0	0	57061000	0	73626000	0	0
Q15036	SNX17	2	0	1	0	0	0	0	1	1	0	0	0	2	0	0	0	0	0	0	0	0	0	0	0	0	0	0	0	0	0
Q15041	ARL6IP1	1	0	0	0	0	1	0	0	0	0	1	0	0	0	0	52868000	0	0	0	0	0	0	0	0	0	0	0	0	0	0
Q15042	RAB3GAP1	4	0	3	0	0	2	0	1	2	0	1	0	0	0	0	24295000	0	24315000	0	0	23693000	0	0	0	0	0	0	0	0	0
Q15043	SLC39A14	0	0	0	0	0	2	0	1	1	0	1	0	0	0	0	0	0	0	0	0	26956000	0	0	0	0	0	0	0	0	0
Q15046	KARS	10	0	12	0	2	11	2	12	7	1	7	7	7	0	0	276630000	0	261730000	0	37984000	350000000	28284000	218590000	170270000	45479000	264610000	103070000	152400000	0	0
Q15050	RRS1	2	0	3	0	0	0	0	1	0	0	0	0	1	0	0	37474000	0	0	0	0	0	0	0	0	0	0	0	0	0	0
Q15054	POLD3	1	0	0	0	1	2	0	1	0	1	0	0	0	0	1	0	0	0	0	0	12647000	0	0	0	0	0	0	0	0	0
Q15057	ACAP2	0	0	0	0	0	1	0	0	0	0	0	0	0	0	0	0	0	0	0	0	0	0	0	0	0	0	0	0	0	0
Q15061	WDR43	3	0	2	0	0	1	1	5	3	0	0	0	2	0	0	0	0	15888000	0	0	0	0	38674000	26500000	0	0	0	16820000	0	0
Q15067	ACOX1	11	1	10	0	1	16	7	10	10	1	12	9	9	4	0	299130000	0	338110000	0	0	486250000	138250000	216060000	213730000	0	609000000	398530000	274180000	126890000	0
Q15075	EEA1	3	0	7	0	0	13	0	10	6	0	7	0	5	0	0	25535000	0	58790000	0	0	86527000	0	64476000	46400000	0	83087000	0	63565000	0	0
Q15124	PGM5	3	0	2	0	0	1	0	1	0	0	1	0	0	0	0	0	0	0	0	0	0	0	0	0	0	0	0	0	0	0
Q15125	EBP	1	1	1	1	1	1	1	1	1	0	1	1	1	1	1	0	0	0	0	0	0	0	0	0	0	116690000	0	0	0	0
Q15147	PLCB4	0	0	0	0	0	0	0	0	0	0	0	0	0	0	0	0	0	0	0	0	0	0	0	0	0	0	0	0	0	0
Q15154	PCM1	0	0	0	1	0	0	0	1	0	0	0	0	0	0	0	0	0	0	821530000	0	0	0	0	0	0	0	0	0	0	0
Q15165	PON2	4	0	1	0	0	9	0	1	1	0	2	0	1	0	0	90105000	0	0	0	0	112840000	0	0	0	0	48843000	0	0	0	0
Q15172	PPP2R5A	2	0	0	0	0	1	0	1	0	0	0	0	0	0	0	8542100	0	0	0	0	0	0	0	0	0	0	0	0	0	0
Q15181	PPA1	11	3	11	0	4	13	1	7	6	1	4	3	6	2	1	567240000	104340000	485360000	0	119220000	483900000	0	183850000	170610000	0	233860000	107750000	147050000	69871000	0
Q15185	PTGES3	2	1	2	0	2	3	1	2	2	1	2	1	1	1	0	113000000	0	0	0	87029000	164300000	0	93021000	96648000	0	141290000	0	0	0	0
Q15208;Q9Y2H1	STK38	0	0	0	0	0	1	0	0	0	0	0	0	0	0	0	0	0	0	0	0	0	0	0	0	0	0	0	0	0	0
Q15257	PPP2R4	4	0	4	0	0	5	0	3	2	0	2	2	1	0	0	33583000	0	26561000	0	0	50974000	0	17279000	0	0	29547000	0	0	0	0
Q15262	PTPRK	0	0	0	0	0	1	0	0	0	0	1	0	0	0	0	0	0	0	0	0	0	0	0	0	0	12062000	0	0	0	0
Q15269	PWP2	3	0	3	0	0	4	2	8	4	2	0	0	2	1	0	45504000	0	38132000	0	0	22558000	22981000	76747000	34293000	31069000	0	0	21436000	0	0
Q15286	RAB35	3	0	3	0	0	3	2	6	4	0	1	0	4	1	0	64595000	0	45719000	0	0	79692000	68213000	85119000	89371000	0	0	0	53475000	0	0
Q15291	RBBP5	1	0	0	0	0	2	0	2	0	0	0	0	0	0	0	0	0	0	0	0	0	0	8640200	0	0	0	0	0	0	0
Q15293	RCN1	2	2	8	0	2	3	0	0	0	0	2	0	0	0	0	22785000	32865000	145040000	0	37441000	56982000	0	0	0	0	51900000	0	0	0	0
Q15363	TMED2	2	1	1	0	1	1	1	3	2	1	0	1	2	1	0	0	0	0	0	0	0	0	37042000	37054000	0	0	0	0	0	0
Q15369	TCEB1	0	0	1	0	0	1	0	0	1	0	0	0	0	0	0	0	0	0	0	0	0	0	0	0	0	0	0	0	0	0
Q15370	TCEB2	3	0	3	0	0	7	0	1	1	0	3	1	0	0	0	50638000	0	50345000	0	0	115220000	0	0	0	0	68288000	0	0	0	0
Q15392	DHCR24	0	0	1	1	0	1	0	0	0	0	0	0	0	0	0	0	0	0	5488300	0	0	0	0	0	0	0	0	0	0	0
Q15404	RSU1	1	0	0	0	0	2	0	0	0	0	0	0	0	0	0	0	0	0	0	0	20798000	0	0	0	0	0	0	0	0	0
Q15417	CNN3	2	1	4	0	0	1	1	2	0	0	0	1	0	0	1	29575000	0	37962000	0	0	0	0	36970000	0	0	0	0	0	0	0
Q15418;Q96GX5;O60307;Q9Y2H9	RPS6KA1	6	0	11	0	0	5	1	5	6	1	3	1	4	1	0	42083000	0	30343000	0	0	31851000	0	31371000	22278000	0	0	0	0	0	0
Q15427	SF3B4	2	1	1	0	1	4	1	2	2	2	1	1	3	2	1	40362000	0	0	0	0	72695000	0	45781000	34964000	28078000	0	0	42966000	52743000	0
Q15428	SF3A2	3	0	2	0	0	2	0	2	3	2	1	0	1	1	0	42850000	0	23632000	0	0	38545000	0	24330000	30616000	42687000	0	0	0	0	0
Q15434	RBMS2	0	0	0	0	0	0	0	1	1	0	0	0	0	0	0	0	0	0	0	0	0	0	0	0	0	0	0	0	0	0
Q15436	SEC23A	12	1	17	1	3	15	2	16	10	3	7	2	9	6	1	430300000	0	378700000	0	44252000	384710000	0	413590000	290750000	76516000	367150000	0	291470000	106100000	0
Q15437	SEC23B	10	1	10	1	3	13	2	12	11	2	6	2	9	3	0	88153000	0	111730000	0	36575000	143600000	58058000	157190000	114210000	0	90546000	55056000	130950000	59664000	0
Q15477	SKIV2L	5	0	0	0	0	5	0	3	2	0	3	0	2	1	0	59471000	0	0	0	0	31106000	0	34562000	0	0	45322000	0	0	0	0
Q15599	SLC9A3R2	4	0	6	0	0	3	0	1	1	0	4	0	3	0	0	50786000	0	36561000	0	0	40938000	0	0	0	0	37924000	0	32652000	0	0
Q15631	TSN	7	0	4	0	0	8	0	3	2	0	3	2	1	0	0	100000000	0	49685000	0	0	144320000	0	27359000	32944000	0	45106000	28242000	0	0	0
Q15642	TRIP10	1	0	2	0	0	1	0	1	1	0	0	0	0	0	0	0	0	0	0	0	0	0	0	0	0	0	0	0	0	0
Q15645	TRIP13	1	0	2	0	0	2	0	1	1	0	1	0	0	0	0	8882200	0	0	0	0	0	0	0	0	0	0	0	0	0	0
Q15646	OASL	6	0	3	0	1	0	0	0	0	0	0	3	0	0	0	32054000	0	29144000	0	0	0	0	0	0	0	0	0	0	0	0
Q15651	HMGN3	1	0	2	1	1	1	1	3	1	1	1	2	2	2	1	0	0	0	0	0	0	0	4133600	0	0	0	0	0	0	0
Q15691	MAPRE1	6	0	7	0	1	9	1	5	2	0	4	0	2	1	0	165710000	0	159640000	0	0	220540000	0	116850000	56513000	0	179670000	0	57453000	0	0
Q15738	NSDHL	8	0	6	0	1	11	0	7	5	0	2	1	5	2	0	271910000	0	147410000	0	0	265530000	0	68503000	64284000	0	46819000	0	89244000	37997000	0
Q15746	MYLK	1	0	1	0	0	1	0	1	0	0	0	1	0	0	0	0	0	0	0	0	25433000	0	0	0	0	0	0	0	0	0
Q15751	HERC1	0	0	0	0	0	0	0	1	1	0	1	0	1	0	0	0	0	0	0	0	0	0	329020000	0	0	0	0	0	0	0
Q15758	SLC1A5	2	0	2	0	0	3	1	4	3	1	1	0	4	0	1	0	0	71894000	0	0	65925000	0	29279000	33312000	0	0	0	35305000	0	0
Q15773	MLF2	0	0	0	0	1	0	0	0	0	0	0	0	0	0	0	0	0	0	0	5126100	0	0	0	0	0	0	0	0	0	0
Q15785	TOMM34	9	0	9	1	0	8	2	9	10	1	2	0	4	1	0	226230000	0	108730000	0	0	179030000	20280000	151580000	193020000	0	17007000	0	38643000	0	0
Q15814	TBCC	0	0	0	0	0	0	0	0	0	0	0	0	0	0	0	0	0	0	0	0	0	0	0	0	0	0	0	0	0	0
Q15828	CST6	0	3	1	0	2	0	2	1	1	1	0	3	0	3	1	0	101980000	0	0	79820000	0	89768000	0	0	0	0	143710000	0	106390000	0
Q15833	STXBP2	8	1	5	0	0	5	0	5	4	0	1	0	5	0	0	60105000	0	47451000	0	0	44126000	0	56256000	45915000	0	0	0	40582000	0	0
Q15836;P63027;P23763	VAMP3;VAMP2	3	2	4	0	2	2	0	2	2	1	2	1	1	1	0	118600000	39205000	89490000	0	65033000	0	0	61103000	56712000	0	71078000	0	0	0	0
Q15843	NEDD8	0	1	0	0	1	1	0	0	0	0	0	0	0	0	0	0	0	0	0	0	0	0	0	0	0	0	0	0	0	0
Q15904	ATP6AP1	4	0	4	0	0	3	0	1	2	0	1	0	0	0	0	33859000	0	23636000	0	0	50304000	0	0	0	0	0	0	0	0	0
Q16134	ETFDH	1	0	0	0	0	3	0	0	0	0	1	0	1	0	0	0	0	0	0	0	0	0	0	0	0	0	0	0	0	0
Q16186	ADRM1	0	0	2	0	0	2	0	2	1	0	0	0	1	0	0	0	0	18932000	0	0	0	0	15739000	0	0	0	0	0	0	0
Q16204	CCDC6	5	0	7	0	0	6	0	4	3	0	1	0	2	0	0	48318000	0	43354000	0	0	51269000	0	46538000	66133000	0	0	0	0	0	0
Q16222	UAP1	0	0	0	0	0	1	0	0	0	0	0	0	0	0	0	0	0	0	0	0	0	0	0	0	0	0	0	0	0	0
Q16401	PSMD5	8	0	8	0	0	5	0	6	4	0	7	0	1	0	0	63702000	0	56540000	0	0	79640000	0	49952000	46271000	0	67615000	0	0	0	0
Q16513	PKN2	0	0	0	0	0	2	0	0	0	0	0	0	0	0	0	0	0	0	0	0	3577900	0	0	0	0	0	0	0	0	0
Q16531	DDB1	28	6	26	2	8	26	10	24	20	8	15	9	15	8	1	715070000	118660000	576080000	74861000	159550000	906430000	308700000	600170000	552950000	237080000	686690000	248680000	490700000	234530000	0
Q16537;Q15173	PPP2R5E	1	0	1	0	0	5	0	1	1	0	0	0	0	0	0	0	0	0	0	0	33943000	0	0	0	0	0	0	0	0	0
Q16539	MAPK14	1	0	1	0	0	4	0	2	1	0	1	0	0	0	0	0	0	0	0	0	26535000	0	6719400	0	0	0	0	0	0	0
Q16540	MRPL23	0	0	1	0	0	2	0	0	1	0	2	0	0	0	0	0	0	0	0	0	28544000	0	0	0	0	0	0	0	0	0
Q16555	DPYSL2	9	1	10	0	2	8	0	5	6	0	2	0	4	2	0	183460000	0	125840000	0	23888000	110870000	0	57378000	55011000	0	44351000	0	62117000	53206000	0
Q16563	SYPL1	3	2	4	1	2	3	1	3	2	1	3	1	2	1	1	239420000	108070000	125070000	0	93646000	254180000	0	125040000	123430000	0	337830000	0	107000000	0	0
Q16576	RBBP7	4	0	8	0	0	14	1	8	5	1	4	1	4	2	1	54040000	0	133390000	0	0	527110000	0	180350000	106600000	0	112920000	0	92684000	43928000	0
Q16611	BAK1	0	0	0	0	0	2	0	0	0	0	0	0	0	0	0	0	0	0	0	0	15491000	0	0	0	0	0	0	0	0	0
Q16643	DBN1	7	1	7	0	0	14	1	5	5	0	4	0	3	2	0	110410000	0	149520000	0	0	394900000	0	96240000	81979000	0	180370000	0	98314000	80853000	0
Q16644;P49137;O43930;P51817	MAPKAPK3;MAPKAPK2	0	0	0	0	0	1	0	1	1	0	1	0	0	0	0	0	0	0	0	0	0	0	0	0	0	0	0	0	0	0
Q16650	TBR1	1	1	1	0	1	0	1	1	1	1	1	1	1	1	0	0	0	0	0	0	0	0	0	0	0	0	0	48724000	0	0
Q16666;Q6K0P9	IFI16	4	3	7	0	4	0	0	2	0	0	0	2	0	0	0	63762000	26455000	59271000	0	41070000	0	0	21157000	0	0	0	45610000	0	0	0
Q16706	MAN2A1	0	0	1	0	1	1	0	0	0	0	0	0	0	0	0	0	0	0	0	19109000	0	0	0	0	0	0	0	0	0	0
Q16718	NDUFA5	2	0	0	0	0	4	0	2	0	0	1	1	1	0	0	72399000	0	0	0	0	184550000	0	0	0	0	0	0	0	0	0
Q16740	CLPP	1	0	0	0	0	2	0	0	0	0	1	0	1	0	0	0	0	0	0	0	0	0	0	0	0	0	0	0	0	0
Q16762	TST	4	1	2	0	0	3	0	0	0	0	3	1	2	0	0	45101000	0	38923000	0	0	37584000	0	0	0	0	55372000	0	52840000	0	0
Q16769	QPCT	0	0	1	0	0	0	0	0	0	0	0	0	0	0	0	0	0	2019800	0	0	0	0	0	0	0	0	0	0	0	0
Q16774	GUK1	5	0	1	0	0	2	0	1	0	0	1	0	0	0	0	49367000	0	0	0	0	44963000	0	0	0	0	0	0	0	0	0
Q16775	HAGH	1	0	0	0	0	1	0	1	0	0	0	0	1	0	0	0	0	0	0	0	0	0	0	0	0	0	0	0	0	0
Q16787	LAMA3	0	3	2	1	3	0	1	0	1	0	0	0	4	0	0	0	41387000	0	0	15930000	0	0	0	0	0	0	0	21058000	0	0
Q16795	NDUFA9	3	0	2	0	0	8	0	3	7	0	2	4	8	2	1	137980000	0	59273000	0	0	107540000	0	64734000	61034000	0	0	59782000	70120000	45421000	0
Q16822	PCK2	2	0	5	0	0	1	0	1	0	0	1	1	2	0	0	10033000	0	17062000	0	0	0	0	0	0	0	0	0	0	0	0
Q16831	UPP1	3	0	0	0	0	0	0	1	1	0	0	5	0	0	0	21415000	0	0	0	0	0	0	0	0	0	0	138120000	0	0	0
Q16836	HADH	4	1	8	0	0	5	0	3	0	0	2	1	3	0	0	163160000	0	56483000	0	0	51844000	0	28019000	0	0	54808000	0	52662000	0	0
Q16850	CYP51A1	4	0	3	0	0	8	1	2	3	0	1	1	4	0	0	20878000	0	27038000	0	0	41459000	0	46572000	25800000	0	0	0	32908000	0	0
Q16851	UGP2	2	0	1	0	1	2	0	0	2	0	0	1	0	0	0	0	0	0	0	0	0	0	0	0	0	0	35860000	0	0	0
Q16881	TXNRD1	15	2	12	0	4	14	2	9	8	2	6	1	5	2	1	806920000	104030000	617440000	0	220350000	499200000	51394000	229710000	194290000	49535000	201480000	0	95182000	53673000	0
Q27J81	INF2	12	1	13	0	0	14	0	7	4	0	3	0	0	0	0	107150000	0	125130000	0	0	83829000	0	48534000	32095000	0	42482000	0	0	0	0
Q29963;Q29865	HLA-C	10	2	13	1	3	5	0	1	1	0	5	3	4	0	0	160640000	0	183740000	0	0	48357000	0	0	0	0	68582000	62117000	54055000	0	0
Q29RF7	PDS5A	2	0	4	0	0	5	1	6	2	1	0	0	3	0	0	19111000	0	19373000	0	0	23173000	0	22297000	0	0	0	0	18626000	0	0
Q2M2I8	AAK1	1	0	3	0	0	2	0	1	1	0	0	0	0	0	0	0	0	11372000	0	0	0	0	0	0	0	0	0	0	0	0
Q2M389	KIAA1033	2	0	3	0	0	3	0	1	1	0	0	0	1	0	0	0	0	0	0	0	13822000	0	0	0	0	0	0	0	0	0
Q2NKX8	ERCC6L	1	0	0	0	0	3	0	0	0	0	0	0	0	0	0	0	0	0	0	0	25074000	0	0	0	0	0	0	0	0	0
Q2NL82	TSR1	1	0	1	0	0	3	0	1	0	0	0	0	0	0	0	0	0	0	0	0	45970000	0	0	0	0	0	0	0	0	0
Q2TAA2	IAH1	0	0	1	1	1	2	0	1	0	0	0	0	0	0	0	0	0	0	809700000	0	0	0	0	0	0	0	0	0	0	0
Q2TAY7	SMU1	6	0	5	0	0	3	1	8	5	3	3	0	3	0	0	76556000	0	81388000	0	0	94296000	0	146210000	88915000	95916000	68091000	0	64744000	0	0
Q2TAZ0	ATG2A	0	0	2	0	0	0	0	0	0	0	0	0	0	0	0	0	0	8529600	0	0	0	0	0	0	0	0	0	0	0	0
Q2VIQ3;Q6ZMV9	KIF4B	0	0	2	0	0	1	0	1	0	1	0	0	1	0	0	0	0	4280500	0	0	0	0	0	0	0	0	0	0	0	0
Q32MZ4	LRRFIP1	3	1	7	0	1	4	1	6	4	0	1	0	1	1	0	24183000	0	47548000	0	0	38486000	0	43578000	34828000	0	0	0	0	0	0
Q32P28;Q8IVL5	LEPRE1	4	1	3	0	0	3	0	2	1	0	4	0	4	0	0	0	0	61901000	0	0	54888000	0	0	0	0	50334000	0	39142000	0	0
Q32P41	TRMT5	0	0	0	0	0	1	0	1	0	0	1	0	0	0	0	0	0	0	0	0	0	0	0	0	0	21156000	0	0	0	0
Q32P44	EML3	0	0	0	0	0	1	0	0	0	0	0	0	0	0	0	0	0	0	0	0	4249100	0	0	0	0	0	0	0	0	0
Q330K2	NDUFAF6	0	0	0	0	0	0	0	0	0	0	1	0	0	0	0	0	0	0	0	0	0	0	0	0	0	0	0	0	0	0
Q3B726	TWISTNB	0	0	1	0	0	0	0	1	0	0	0	0	0	0	0	0	0	0	0	0	0	0	3444500	0	0	0	0	0	0	0
Q3LXA3	DAK	1	0	0	0	0	0	0	0	1	0	0	0	0	0	0	11673000	0	0	0	0	0	0	0	0	0	0	0	0	0	0
Q3MHD2	LSM12	1	0	1	0	0	3	0	2	2	0	1	0	0	0	0	0	0	0	0	0	81775000	0	47527000	43722000	0	0	0	0	0	0
Q3MJ16	PLA2G4E	0	0	0	1	0	1	0	0	0	0	0	1	0	0	0	0	0	0	0	0	0	0	0	0	0	0	0	0	0	0
Q3SXM5	HSDL1	0	0	3	0	0	1	0	0	1	0	2	0	0	0	0	0	0	19980000	0	0	0	0	0	0	0	0	0	0	0	0
Q3V6T2	CCDC88A	0	0	0	0	0	0	0	0	1	0	0	0	0	0	0	0	0	0	0	0	0	0	0	0	0	0	0	0	0	0
Q3YEC7	RABL6	1	0	0	0	0	0	0	2	0	0	0	0	0	0	0	0	0	0	0	0	0	0	8624100	0	0	0	0	0	0	0
Q3ZAQ7	VMA21	1	0	0	1	0	0	0	0	0	0	0	0	0	0	0	0	0	0	0	0	0	0	0	0	0	0	0	0	0	0
Q3ZCM7	TUBB8	11	6	11	4	7	9	7	10	10	6	5	7	8	5	5	471030000	0	284370000	0	0	310240000	0	154000000	138320000	0	0	0	69704000	0	0
Q3ZCQ8	TIMM50	4	0	2	0	0	4	0	3	2	0	4	0	4	0	0	82653000	0	39421000	0	0	77817000	0	30784000	38189000	0	36248000	0	29238000	0	0
Q3ZCW2	LGALSL	0	1	1	0	2	0	0	0	0	0	0	2	0	0	0	0	0	0	0	0	0	0	0	0	0	0	40512000	0	0	0
Q460N5	PARP14	6	3	19	0	2	1	0	3	1	0	1	1	2	0	0	62902000	55782000	251790000	0	30067000	0	0	0	0	0	0	0	0	0	0
Q495W5	FUT11	1	0	1	0	0	2	0	0	0	0	0	0	1	0	0	0	0	0	0	0	21590000	0	0	0	0	0	0	0	0	0
Q49A26	GLYR1	1	0	0	0	0	1	0	1	0	0	0	0	1	0	0	0	0	0	0	0	4617400	0	0	0	0	0	0	0	0	0
Q4G0F5	VPS26B	1	0	0	0	0	3	0	2	0	0	1	0	2	0	0	0	0	0	0	0	0	0	0	0	0	15296000	0	0	0	0
Q4G0J3	LARP7	1	0	1	0	0	1	0	1	0	0	1	0	0	0	0	0	0	0	0	0	0	0	0	0	0	0	0	0	0	0
Q4G176	ACSF3	3	0	2	0	0	3	0	2	1	0	3	0	2	0	0	0	0	0	0	0	25055000	0	12012000	0	0	0	0	19737000	0	0
Q4KWH8;P51178	PLCH1	0	0	1	0	0	2	0	1	1	0	1	0	1	0	1	0	0	0	0	0	35983000	0	0	0	0	0	0	0	0	0
Q4V328	GRIPAP1	0	0	0	0	0	0	0	0	0	0	0	0	0	0	0	0	0	0	0	0	0	0	0	0	0	0	0	0	0	0
Q4VC31	CCDC58	1	0	1	0	0	1	0	0	0	0	1	0	1	0	0	0	0	0	0	0	0	0	0	0	0	0	0	0	0	0
Q52LG2	KRTAP13-2	0	0	0	0	1	0	0	0	0	1	0	0	0	0	0	0	0	0	0	14533000	0	0	0	0	0	0	0	0	0	0
Q52LJ0	FAM98B	8	0	5	0	0	6	3	6	7	0	3	0	3	1	1	69948000	0	61526000	0	0	63531000	43935000	61526000	77252000	0	73729000	0	0	0	0
Q52LW3	ARHGAP29	10	0	10	0	0	14	0	7	6	0	4	0	4	0	0	114610000	0	83512000	0	0	97271000	0	59909000	51856000	0	60317000	0	41354000	0	0
Q53EL6	PDCD4	1	0	0	0	0	1	0	2	1	0	0	0	1	0	0	0	0	0	0	0	15909000	0	0	0	0	0	0	0	0	0
Q53EP0	FNDC3B	0	0	0	5	2	0	5	4	6	5	0	0	3	4	1	0	0	0	53313000	35240000	0	77371000	25879000	48635000	63978000	0	0	0	73410000	0
Q53F19	C17orf85	0	0	0	0	0	0	0	3	1	1	0	0	0	0	1	0	0	0	0	0	0	0	19880000	0	0	0	0	0	0	0
Q53FA7	TP53I3	0	0	0	0	0	0	0	0	0	0	0	0	0	0	0	0	0	0	0	0	0	0	0	0	0	0	0	0	0	0
Q9P0S3;Q8N138;Q53FV1	ORMDL1;ORMDL3;ORMDL2	0	0	1	0	1	0	0	1	0	0	0	0	1	0	0	0	0	0	0	0	0	0	0	0	0	0	0	12228000	0	0
Q53G44	IFI44L	3	0	1	0	0	0	0	0	0	0	0	0	0	0	0	0	0	0	0	0	0	0	0	0	0	0	0	0	0	0
Q53GL7	PARP10	5	0	2	0	0	0	0	0	0	0	0	0	0	0	0	32577000	0	0	0	0	0	0	0	0	0	0	0	0	0	0
Q53GQ0	HSD17B12	10	1	9	1	2	9	2	9	8	0	4	1	7	5	0	413170000	0	323220000	0	130910000	296280000	72757000	168010000	164000000	0	141050000	0	173720000	113730000	0
Q53GS9	USP39	5	0	2	0	0	7	2	10	8	4	1	0	4	1	1	0	0	0	0	0	69332000	49669000	121340000	94102000	138890000	0	0	69487000	0	0
Q53H12	AGK	5	0	6	0	0	6	0	2	2	1	5	1	4	1	1	156660000	0	105810000	0	0	132720000	0	69742000	78754000	0	164850000	0	73676000	0	0
Q53H82	LACTB2	5	0	4	0	0	4	0	2	1	0	2	0	0	0	0	0	0	25881000	0	0	23810000	0	26287000	0	0	42307000	0	0	0	0
Q53H96	PYCRL	5	0	3	0	0	2	0	2	0	0	1	0	1	0	0	28911000	0	29094000	0	0	33925000	0	0	0	0	0	0	0	0	0
Q53HC0	CCDC92	0	0	0	0	0	0	0	0	0	0	0	0	0	0	0	0	0	0	0	0	0	0	0	0	0	0	0	0	0	0
Q53HC9	TSSC1	0	0	2	0	0	2	0	1	0	0	0	0	0	0	0	0	0	11358000	0	0	11794000	0	0	0	0	0	0	0	0	0
Q53RT3	ASPRV1	0	1	1	0	1	0	1	1	2	2	0	2	0	1	1	0	0	0	0	0	0	0	0	65011000	61867000	0	286230000	0	0	0
Q562E7	WDR81	0	1	1	0	0	0	0	0	0	0	0	0	0	0	0	0	0	59539000	0	0	0	0	0	0	0	0	0	0	0	0
Q562R1	ACTBL2	7	4	9	3	5	6	4	5	5	3	4	6	5	3	3	0	0	0	0	0	4491900000	0	0	0	0	0	0	0	0	0
Q567U6	CCDC93	0	0	0	0	0	0	0	0	0	0	1	0	0	0	0	0	0	0	0	0	0	0	0	0	0	0	0	0	0	0
Q56A73	SPIN4	0	1	1	1	1	0	1	1	1	1	0	1	2	1	1	0	0	0	0	0	0	0	0	0	0	0	0	83532000	0	0
Q56VL3	OCIAD2	4	0	4	0	0	5	0	2	2	0	1	0	1	0	0	131960000	0	65988000	0	0	86013000	0	31302000	28046000	0	96964000	0	0	0	0
Q58EX2	SDK2	0	0	0	1	0	0	0	0	0	0	1	0	0	0	0	0	0	0	0	0	0	0	0	0	0	0	0	0	0	0
Q58FF6	HSP90AB4P	6	3	7	3	3	7	2	5	5	0	3	5	6	3	4	0	0	0	0	0	35113000	0	0	44793000	0	0	0	50854000	0	0
Q58FF8	HSP90AB2P	10	4	10	4	6	10	5	8	8	4	8	7	6	6	4	487910000	0	790860000	0	0	569650000	128770000	311450000	376430000	0	0	225340000	201450000	0	0
Q5BJD5	TMEM41B	1	0	1	0	0	1	1	1	1	1	1	1	1	1	0	44770000	0	0	0	0	20532000	0	50183000	46631000	32361000	21417000	0	0	0	0
Q5BJH7	YIF1B	0	0	1	0	0	2	0	0	0	0	0	1	1	0	0	0	0	0	0	0	0	0	0	0	0	0	0	0	0	0
Q5BKZ1	ZNF326	1	0	1	0	0	3	1	4	4	3	0	0	0	0	0	0	0	0	0	0	25662000	0	39932000	45603000	78227000	0	0	0	0	0
Q5EBM0	CMPK2	1	0	0	0	0	0	0	0	0	0	0	0	0	0	0	0	0	0	0	0	0	0	0	0	0	0	0	0	0	0
Q5GLZ8	HERC4	1	0	0	0	0	4	0	3	1	0	2	0	1	0	0	0	0	0	0	0	56745000	0	0	0	0	0	0	0	0	0
Q5H9R7	PPP6R3	1	0	0	0	0	2	0	0	0	0	0	0	0	0	0	0	0	0	0	0	5131700	0	0	0	0	0	0	0	0	0
Q5HYI8	RABL3	1	0	0	0	0	2	0	0	0	0	0	0	0	0	0	0	0	0	0	0	13608000	0	0	0	0	0	0	0	0	0
Q5J8M3	EMC4	1	0	0	0	0	1	0	1	0	0	0	0	1	0	0	0	0	0	0	0	0	0	0	0	0	0	0	0	0	0
Q5JRA6	MIA3	2	0	2	0	1	6	0	3	2	0	5	0	3	0	1	12123000	0	0	0	0	33415000	0	25539000	12556000	0	39200000	0	0	0	0
Q5JRX3	PITRM1	13	1	15	0	1	12	1	9	9	0	6	2	11	5	0	172840000	0	162020000	0	0	183350000	0	119580000	102080000	0	210750000	56193000	204420000	95807000	0
Q5JSH3	WDR44	1	0	2	0	0	1	0	1	1	0	1	0	1	0	0	0	0	0	0	0	0	0	0	0	0	17665000	0	0	0	0
Q5JTD0	TJAP1	0	0	0	0	0	0	0	0	0	0	1	0	0	0	0	0	0	0	0	0	0	0	0	0	0	0	0	0	0	0
Q5JTH9	RRP12	6	0	5	0	0	6	0	9	2	1	3	0	0	0	0	48581000	0	32914000	0	0	49784000	0	55119000	22836000	0	43842000	0	0	0	0
Q5JTV8	TOR1AIP1	2	0	3	0	0	1	1	3	3	0	2	0	1	0	0	13593000	0	9154000	0	0	0	0	17293000	13557000	0	11004000	0	0	0	0
Q5JTZ9	AARS2	3	1	8	0	1	5	0	5	2	0	2	0	2	0	0	10861000	0	30504000	0	0	15479000	0	9006300	11039000	0	14697000	0	14952000	0	0
Q5JVF3	PCID2	2	0	0	0	0	0	0	0	0	0	0	0	0	0	0	12620000	0	0	0	0	0	0	0	0	0	0	0	0	0	0
Q5K651	SAMD9	3	0	2	0	0	0	0	0	0	0	0	0	0	0	0	0	0	21133000	0	0	0	0	0	0	0	0	0	0	0	0
Q5MNZ6	WDR45B	0	0	1	0	0	0	0	0	0	0	0	0	0	0	0	0	0	3984700	0	0	0	0	0	0	0	0	0	0	0	0
Q5QJE6	DNTTIP2	2	0	0	0	0	1	0	6	3	0	0	0	0	0	0	0	0	0	0	0	0	0	52098000	20232000	0	0	0	0	0	0
Q5RI15	COX20	3	0	2	0	0	1	0	0	0	0	1	0	0	0	0	22167000	0	12948000	0	0	0	0	0	0	0	0	0	0	0	0
Q5RKV6	EXOSC6	0	0	1	0	0	1	0	0	0	0	0	0	0	0	0	0	0	3416000	0	0	0	0	0	0	0	0	0	0	0	0
Q5SRE5	NUP188	0	0	0	0	1	3	0	1	0	0	0	0	0	0	0	0	0	0	0	0	14721000	0	0	0	0	0	0	0	0	0
Q5ST30	VARS2	0	0	2	0	0	0	0	0	0	0	0	0	0	0	0	0	0	7106100	0	0	0	0	0	0	0	0	0	0	0	0
Q5SW79;Q96L14	CEP170	6	0	5	0	0	4	0	5	4	0	2	0	5	0	0	42368000	0	31890000	0	0	0	0	26323000	22678000	0	0	0	35545000	0	0
Q5SY16	NOL9	3	0	2	0	0	6	0	5	2	0	2	0	1	0	0	41922000	0	35133000	0	0	34676000	0	27707000	28569000	0	39321000	0	0	0	0
Q5T0D9	TPRG1L	3	0	2	0	0	6	0	0	0	0	1	0	0	0	0	45140000	0	0	0	0	34292000	0	0	0	0	0	0	0	0	0
Q5T1M5	FKBP15	1	0	0	0	0	1	0	0	0	0	0	0	0	0	0	0	0	0	0	0	0	0	0	0	0	0	0	0	0	0
Q5T3I0	GPATCH4	0	0	1	0	0	1	0	3	1	1	0	0	0	1	0	0	0	0	0	0	0	0	0	12398000	0	0	0	0	0	0
Q5T440	IBA57	0	0	0	0	0	2	0	0	0	0	2	0	2	0	0	0	0	0	0	0	9113700	0	0	0	0	15509000	0	0	0	0
Q5T4S7	UBR4	7	0	6	0	0	18	0	8	3	0	5	0	2	0	0	65287000	0	34721000	0	0	128740000	0	39202000	36893000	0	34672000	0	14674000	0	0
Q5T5P2	KIAA1217	0	0	0	0	0	0	0	0	0	0	0	0	0	0	0	0	0	0	0	0	0	0	0	0	0	0	0	0	0	0
Q5T653	MRPL2	2	0	1	0	0	2	0	1	1	0	1	0	1	1	0	14874000	0	0	0	0	30617000	0	0	0	0	0	0	0	0	0
Q5T8P6	RBM26	0	0	1	2	1	0	1	5	8	1	0	0	1	5	1	0	0	0	0	0	0	0	0	44326000	0	0	0	0	76251000	0
Q5T9A4	ATAD3B	6	0	10	0	2	9	1	8	5	1	5	3	6	2	2	0	0	60614000	0	0	0	0	0	0	0	0	0	0	0	0
Q5TAQ9	DCAF8	2	0	0	0	1	1	0	0	0	0	0	0	0	0	0	0	0	0	0	0	0	0	0	0	0	0	0	0	0	0
Q5TC12	ATPAF1	1	0	0	0	0	1	0	1	0	0	0	0	0	0	0	0	0	0	0	0	0	0	0	0	0	0	0	0	0	0
Q5THK1	PRR14L	0	0	1	0	1	0	0	1	1	0	0	0	1	1	0	0	0	0	0	0	0	0	0	0	0	0	0	11336000	0	0
Q5TZA2	CROCC	1	2	2	1	2	1	2	1	2	2	1	2	2	3	1	0	110090000	103030000	0	109900000	0	361000000	0	172480000	656570000	0	680300000	250020000	188910000	0
Q5U5X0	LYRM7	1	0	0	0	0	2	0	0	0	0	0	0	0	0	0	0	0	0	0	0	16324000	0	0	0	0	0	0	0	0	0
Q5UIP0	RIF1	0	0	0	0	0	2	0	4	1	0	0	0	1	0	0	0	0	0	0	0	0	0	17400000	0	0	0	0	0	0	0
Q5VIR6	VPS53	1	0	0	0	0	0	0	0	0	0	0	0	0	0	0	0	0	0	0	0	0	0	0	0	0	0	0	0	0	0
Q5VSL9	STRIP1	1	0	0	0	0	1	0	1	0	0	0	0	0	0	0	0	0	0	0	0	12437000	0	0	0	0	0	0	0	0	0
Q5VT25	CDC42BPA	0	1	0	0	0	1	0	1	0	0	0	0	0	1	0	0	19762000	0	0	0	0	0	0	0	0	0	0	0	0	0
Q5VT52	RPRD2	1	0	0	0	0	0	0	1	0	0	0	0	0	0	0	0	0	0	0	0	0	0	0	0	0	0	0	0	0	0
Q5VT66;Q969Z3	2017-03-01	2	0	2	0	0	1	0	2	0	0	0	0	0	0	0	85676000	0	57098000	0	0	0	0	0	0	0	0	0	0	0	0
Q5VT79	ANXA8L2	0	0	0	0	0	0	7	0	0	0	0	10	0	0	0	0	0	0	0	0	0	0	0	0	0	0	35946000	0	0	0
Q5VTR2	RNF20	0	0	0	0	0	0	0	3	2	3	0	0	2	0	1	0	0	0	0	0	0	0	24384000	0	0	0	0	0	0	0
Q5VU13	VSIG8	0	0	0	0	0	0	0	0	0	4	0	0	0	0	2	0	0	0	0	0	0	0	0	0	241190000	0	0	0	0	0
Q5VW32	BROX	3	0	1	0	1	5	0	4	0	0	1	1	1	1	0	80876000	0	0	0	0	24579000	0	27866000	0	0	0	0	0	0	0
Q5VW36	FOCAD	1	0	0	0	0	1	0	0	0	0	0	0	0	0	0	0	0	0	0	0	0	0	0	0	0	0	0	0	0	0
Q5VWZ2	LYPLAL1	0	0	0	0	0	3	0	0	1	0	1	0	0	0	0	0	0	0	0	0	33240000	0	0	0	0	0	0	0	0	0
Q5VYK3	ECM29	1	0	3	0	0	4	0	2	0	0	0	0	0	0	0	0	0	0	0	0	19111000	0	0	0	0	0	0	0	0	0
Q5VYY1	ANKRD22	0	0	0	0	0	0	0	0	0	0	0	2	0	0	0	0	0	0	0	0	0	0	0	0	0	0	48146000	0	0	0
Q5XKP0	QIL1	1	0	0	0	0	2	0	1	0	0	0	0	1	0	0	0	0	0	0	0	37707000	0	0	0	0	0	0	0	0	0
Q5XXA6	ANO1	2	0	1	0	0	0	0	0	0	0	0	0	0	0	0	12849000	0	0	0	0	0	0	0	0	0	0	0	0	0	0
Q5ZPR3	CD276	2	0	0	0	0	2	0	0	0	0	0	0	0	0	0	8312000	0	0	0	0	0	0	0	0	0	0	0	0	0	0
Q63HN8	RNF213	28	0	14	0	0	24	1	10	3	0	8	0	4	0	0	243210000	0	45706000	0	0	211060000	0	44497000	34185000	0	66900000	0	41479000	0	0
Q63ZY3	KANK2	0	0	0	0	0	2	0	1	0	0	0	0	1	0	0	0	0	0	0	0	4660700	0	0	0	0	0	0	0	0	0
Q9Y4E1;Q641Q2;Q5SRD0	FAM21C;FAM21A	3	0	4	0	0	3	0	1	1	0	2	0	0	0	0	28361000	0	0	0	0	27975000	0	0	0	0	0	0	0	0	0
Q643R3	LPCAT4	0	0	0	0	0	1	0	1	0	0	0	0	0	0	0	0	0	0	0	0	0	0	0	0	0	0	0	0	0	0
Q658P3	STEAP3	1	0	2	0	0	1	0	0	0	0	0	0	0	0	0	0	0	6596800	0	0	0	0	0	0	0	0	0	0	0	0
Q658Y4;P0C866	FAM91A1	2	0	1	0	0	5	0	4	2	0	1	0	1	0	0	23379000	0	0	0	0	33461000	0	13300000	23226000	0	0	0	0	0	0
Q66K14	TBC1D9B	0	0	0	0	0	0	0	0	0	0	0	0	0	0	0	0	0	0	0	0	0	0	0	0	0	0	0	0	0	0
Q66K74	MAP1S	3	0	1	0	0	4	0	2	2	0	0	0	2	0	0	54251000	0	0	0	0	0	0	0	0	0	0	0	0	0	0
Q66PJ3	ARL6IP4	0	0	2	0	2	0	1	1	2	0	0	0	2	1	1	0	0	0	0	16429000	0	0	0	0	0	0	0	20859000	0	0
Q68CZ2	TNS3	12	0	9	0	0	11	2	15	5	0	3	0	8	0	0	138630000	0	67522000	0	0	133240000	20962000	106250000	56513000	0	36185000	0	98720000	0	0
Q68D91	MBLAC2	1	0	1	0	0	5	0	0	1	0	2	0	1	0	0	0	0	0	0	0	48460000	0	0	0	0	48384000	0	0	0	0
Q68E01	INTS3	2	0	0	0	0	5	0	0	0	0	2	0	1	0	0	0	0	0	0	0	31605000	0	0	0	0	0	0	0	0	0
Q69YN2	CWF19L1	0	0	0	0	0	1	0	2	0	0	0	0	1	0	0	0	0	0	0	0	0	0	6088300	0	0	0	0	0	0	0
Q69YN4	KIAA1429	0	0	0	1	0	0	0	3	2	1	0	0	2	4	1	0	0	0	0	0	0	0	0	0	0	0	0	0	85909000	0
Q6DD87	ZNF787	1	0	0	0	0	2	0	2	2	1	0	0	0	0	0	0	0	0	0	0	0	0	26826000	27071000	22237000	0	0	0	0	0
Q6DD88	ATL3	9	0	7	0	0	10	3	10	8	1	4	2	9	4	1	146600000	0	128290000	0	0	394720000	52954000	175850000	143480000	0	264750000	75477000	150320000	78090000	0
Q6DKI1	RPL7L1	2	0	1	0	0	2	0	1	2	0	0	0	1	0	0	0	0	0	0	0	0	0	0	14559000	0	0	0	0	0	0
Q6FI81	CIAPIN1	0	0	0	0	0	2	0	0	0	0	1	0	0	0	0	0	0	0	0	0	17812000	0	0	0	0	0	0	0	0	0
Q6GMV2	SMYD5	1	0	1	0	0	1	0	1	1	0	0	0	0	0	0	0	0	0	0	0	0	0	9310200	0	0	0	0	0	0	0
Q6GMV3	PTRHD1	2	0	0	0	0	1	0	0	0	0	0	0	0	0	0	0	0	0	0	0	9185300	0	0	0	0	0	0	0	0	0
Q6GTS8	PM20D1	0	2	1	0	1	0	0	1	7	0	0	3	0	0	0	0	27140000	0	0	0	0	0	0	63458000	0	0	26305000	0	0	0
Q6IAA8	LAMTOR1	6	0	4	0	1	5	0	0	0	0	4	0	0	0	0	106960000	0	72890000	0	0	62583000	0	0	0	0	78838000	0	0	0	0
Q6IAN0	DHRS7B	0	0	1	0	0	0	0	0	0	0	0	0	0	0	0	0	0	0	0	0	0	0	0	0	0	0	0	0	0	0
Q6IN85	SMEK1	0	0	1	0	0	0	0	1	0	0	0	0	0	0	0	0	0	0	0	0	0	0	0	0	0	0	0	0	0	0
Q6IQ22	RAB12	0	0	1	0	0	1	0	0	0	0	0	0	0	0	0	0	0	0	0	0	0	0	0	0	0	0	0	0	0	0
Q6L8Q7	PDE12	8	0	4	0	0	7	0	8	6	2	3	0	2	2	0	102240000	0	63541000	0	0	103940000	0	87048000	82985000	31170000	62546000	0	45512000	0	0
Q6MZM0	HEPHL1	0	0	0	0	0	0	0	0	0	0	0	4	0	0	0	0	0	0	0	0	0	0	0	0	0	0	47778000	0	0	0
Q6NSJ5	LRRC8E	1	0	0	0	0	1	0	2	0	0	1	0	1	0	0	8511700	0	0	0	0	0	0	0	0	0	0	0	0	0	0
Q6NUJ1	PSAPL1	0	1	1	1	1	0	2	2	2	2	0	2	0	2	0	0	0	0	0	0	0	0	12225000	29587000	0	0	20253000	0	0	0
Q6NUK1	SLC25A24	5	0	5	0	0	3	0	2	1	0	2	0	1	0	0	28389000	0	36472000	0	0	45432000	0	30661000	0	0	35531000	0	0	0	0
Q6NUK4	REEP3	2	0	2	0	0	0	0	0	0	0	0	0	0	0	0	0	0	12638000	0	0	0	0	0	0	0	0	0	0	0	0
Q6NUM9	RETSAT	4	0	4	0	0	6	0	3	2	0	4	1	4	2	0	45588000	0	43392000	0	0	51195000	0	31398000	40196000	0	76308000	0	58048000	43002000	0
Q6NVY1	HIBCH	2	0	1	0	0	1	0	2	0	0	2	3	3	0	0	15454000	0	0	0	0	0	0	16599000	0	0	39463000	34887000	18345000	0	0
Q6NYC1	JMJD6	1	0	0	0	0	3	0	2	0	0	1	0	0	0	0	0	0	0	0	0	28901000	0	0	0	0	0	0	0	0	0
Q6NYC8	PPP1R18	0	0	3	0	0	2	0	0	0	0	0	0	0	0	0	0	0	9736600	0	0	0	0	0	0	0	0	0	0	0	0
Q6NZY4	ZCCHC8	0	0	0	0	0	0	0	0	0	0	0	0	0	0	0	0	0	0	0	0	0	0	0	0	0	0	0	0	0	0
Q6P1L8	MRPL14	1	0	2	0	0	2	0	2	0	0	1	0	2	0	0	0	0	11279000	0	0	0	0	12384000	0	0	0	0	20460000	0	0
Q6P1M0	SLC27A4	3	0	0	0	0	2	0	1	0	0	1	1	0	0	0	16810000	0	0	0	0	17217000	0	0	0	0	0	0	0	0	0
Q6P1N0	CC2D1A	7	0	8	0	0	5	0	5	4	0	1	0	5	1	0	38986000	0	48056000	0	0	35342000	0	30289000	40631000	0	0	0	28416000	0	0
Q6P1X6	C8orf82	2	0	3	0	0	3	0	3	2	0	3	0	1	0	0	26169000	0	0	0	0	0	0	18835000	34362000	0	57924000	0	0	0	0
Q6P2E9	EDC4	4	0	3	0	0	4	0	5	3	0	2	0	2	0	0	79771000	0	0	0	0	37701000	0	25833000	18823000	0	42734000	0	27462000	0	0
Q6P3W7	SCYL2	1	0	2	0	0	0	0	1	0	0	1	1	1	0	0	0	0	7784800	0	0	0	0	0	0	0	0	0	0	0	0
Q6P4A7	SFXN4	0	0	1	0	0	1	0	0	0	0	0	0	0	0	0	0	0	0	0	0	3336400	0	0	0	0	0	0	0	0	0
Q6P4A8	PLBD1	0	2	2	2	2	0	1	1	1	0	0	0	0	0	0	0	25250000	9141900	0	0	0	0	0	0	0	0	0	0	0	0
Q6P4E1	CASC4	0	0	0	0	0	1	0	0	0	0	1	0	0	0	0	0	0	0	0	0	0	0	0	0	0	0	0	0	0	0
Q6P587	FAHD1	2	0	1	0	0	2	1	2	1	0	0	1	1	1	0	23947000	0	0	0	0	21219000	0	12222000	0	0	0	24229000	16204000	0	0
Q6P5S2	LEG1	0	1	0	0	0	0	0	0	0	0	0	0	0	0	0	0	0	0	0	0	0	0	0	0	0	0	0	0	0	0
Q6P6C2	ALKBH5	0	0	0	0	0	0	0	1	1	1	0	0	1	0	0	0	0	0	0	0	0	0	8028600	0	0	0	0	0	0	0
Q6P9B9	INTS5	1	0	1	0	0	1	0	0	0	0	1	0	0	0	0	0	0	0	0	0	0	0	0	0	0	7848800	0	0	0	0
Q6PCE3	PGM2L1	1	0	1	0	0	1	0	0	0	0	0	0	0	0	0	0	0	6410300	0	0	0	0	0	0	0	0	0	0	0	0
Q6PD62	CTR9	0	0	0	0	0	0	0	1	0	0	0	0	0	0	0	0	0	0	0	0	0	0	6365200	0	0	0	0	0	0	0
Q6PGP7	TTC37	4	0	2	0	0	5	0	2	2	0	1	0	3	0	0	0	0	0	0	0	0	0	0	0	0	0	0	0	0	0
Q6PI48	DARS2	0	0	0	0	0	2	0	1	0	0	1	0	1	0	0	0	0	0	0	0	18432000	0	0	0	0	0	0	0	0	0
Q6PI78	TMEM65	2	0	0	0	0	2	0	0	0	0	2	0	0	0	0	19636000	0	0	0	0	27160000	0	0	0	0	0	0	0	0	0
Q6PJ69	TRIM65	1	0	0	0	0	0	0	0	0	0	0	0	0	0	0	0	0	0	0	0	0	0	0	0	0	0	0	0	0	0
Q6PJG2	ELMSAN1	0	0	0	0	0	0	0	0	0	0	0	0	1	0	0	0	0	0	0	0	0	0	0	0	0	0	0	0	0	0
Q6PJT7	ZC3H14	3	0	2	1	1	3	0	10	9	3	1	0	3	11	1	16370000	0	32808000	0	0	18662000	0	133870000	141130000	46984000	0	0	26254000	449560000	0
Q6PKG0;Q659C4	LARP1	3	0	5	0	0	3	0	2	2	1	1	1	2	0	0	0	0	50389000	0	0	0	0	0	0	0	0	0	39445000	0	0
Q6PML9	SLC30A9	0	0	0	0	0	0	0	0	0	0	0	0	0	0	0	0	0	0	0	0	0	0	0	0	0	0	0	0	0	0
Q6RFH5	WDR74	0	0	0	0	0	1	0	1	0	0	0	0	0	0	0	0	0	0	0	0	0	0	2261100	0	0	0	0	0	0	0
Q6RW13	AGTRAP	2	0	1	0	0	0	0	1	0	0	0	0	1	0	0	0	0	23171000	0	0	0	0	0	0	0	0	0	0	0	0
Q6S8J3;A5A3E0;P0CG38;P0CG39;Q6S5H5;A6NI47;B2RU33;H3BUK9;Q6S545;Q6S5H4;A0JP26	POTEE;POTEF;POTEI	12	7	9	5	7	12	8	12	12	7	10	9	9	8	7	34100000	0	0	0	0	0	0	0	0	0	0	0	0	0	0
Q6UB35	MTHFD1L	0	0	2	0	0	2	0	1	1	0	0	0	3	0	0	0	0	0	0	0	0	0	0	0	0	0	0	0	0	0
Q6UW78	UQCC3	0	0	0	0	0	1	0	0	0	0	0	0	0	0	0	0	0	0	0	0	29762000	0	0	0	0	0	0	0	0	0
Q6UWE0	LRSAM1	1	0	0	0	0	0	0	0	0	0	0	1	0	0	0	0	0	0	0	0	0	0	0	0	0	0	4536400	0	0	0
Q6UWX4;Q96JK4	HHIPL2;HHIPL1	0	0	0	0	0	0	0	0	0	0	0	0	0	0	0	0	0	0	0	0	0	0	0	0	0	0	0	0	0	0
Q6UX04	CWC27	1	0	0	0	0	2	0	2	1	0	0	0	1	0	0	0	0	0	0	0	10745000	0	9651000	0	0	0	0	0	0	0
Q6UX53	METTL7B	3	0	1	0	0	0	0	0	0	0	1	0	0	0	0	15902000	0	0	0	0	0	0	0	0	0	0	0	0	0	0
Q6UXH1	CRELD2	0	0	0	0	0	0	0	0	0	0	0	0	0	0	0	0	0	0	0	0	0	0	0	0	0	0	0	0	0	0
Q6UXN9	WDR82	3	0	3	0	0	3	0	5	3	1	0	0	3	1	0	44903000	0	31852000	0	0	48763000	0	36804000	26387000	0	0	0	46497000	0	0
Q6UXV4	APOOL	2	0	1	0	0	2	0	1	1	0	1	1	2	1	0	18655000	0	0	0	0	0	0	0	0	0	0	0	0	0	0
Q6WCQ1	MPRIP	1	0	2	0	0	4	0	3	0	0	2	0	0	0	0	0	0	30094000	0	0	40140000	0	25430000	0	0	0	0	0	0	0
Q6Y7W6	GIGYF2	4	0	5	0	1	5	0	5	3	0	4	0	2	3	0	60035000	0	33254000	0	0	44308000	0	35369000	51951000	0	53716000	0	36473000	42229000	0
Q6YHK3	CD109	0	0	1	0	0	7	0	2	1	0	1	2	3	0	0	0	0	0	0	0	0	0	6721800	0	0	0	13376000	0	0	0
Q6YN16	HSDL2	3	0	1	0	0	3	0	2	1	0	1	2	3	0	0	61550000	0	0	0	0	54819000	0	0	0	0	0	0	0	0	0
Q6YP21	CCBL2	1	0	2	0	0	1	0	0	0	0	1	0	0	0	0	0	0	0	0	0	0	0	0	0	0	0	0	0	0	0
Q6ZMK1	CYHR1	1	0	0	0	0	1	0	2	0	0	0	0	0	0	0	0	0	0	0	0	0	0	17591000	0	0	0	0	0	0	0
Q6ZNF0	PAPL	0	0	0	0	0	0	0	0	0	1	0	2	0	0	0	0	0	0	0	0	0	0	0	0	0	0	51608000	0	0	0
Q6ZRV2	FAM83H	0	0	0	0	0	0	0	0	0	0	0	8	0	0	0	0	0	0	0	0	0	0	0	0	0	0	123940000	0	0	0
Q6ZSJ8	C1orf122	0	0	1	0	0	0	0	0	0	0	0	0	0	0	0	0	0	2184800	0	0	0	0	0	0	0	0	0	0	0	0
Q6ZSR9		0	0	0	0	0	1	0	1	1	0	0	0	1	0	0	0	0	0	0	0	0	0	0	0	0	0	0	0	0	0
Q6ZUT6	C15orf52	0	0	1	0	0	0	0	2	1	0	0	0	0	0	0	0	0	0	0	0	0	0	0	0	0	0	0	0	0	0
Q6ZV73	FGD6	0	1	1	1	0	0	2	1	2	0	0	1	0	0	0	0	0	0	0	0	0	282290000	0	63318000	0	0	0	0	0	0
Q6ZXV5	TMTC3	0	0	0	0	0	1	0	0	0	0	0	0	0	0	0	0	0	0	0	0	0	0	0	0	0	0	0	0	0	0
Q709C8	VPS13C	0	0	0	0	0	2	0	1	0	0	0	0	0	0	0	0	0	0	0	0	9507900	0	0	0	0	0	0	0	0	0
Q70UQ0	IKBIP	4	1	7	0	0	4	3	2	4	1	4	0	3	1	1	38576000	0	43989000	0	0	47420000	42080000	37045000	48718000	0	52385000	0	36719000	0	0
Q71DI3	HIST2H3A	6	3	5	3	3	8	6	7	7	5	8	4	7	6	5	0	0	0	0	0	1765500000	0	0	0	0	315630000	0	0	0	0
Q71RC2	LARP4	1	0	2	1	0	4	1	6	3	0	0	0	2	1	0	0	0	18326000	0	0	24356000	0	17089000	17430000	0	0	0	16523000	0	0
Q71RG4	TMUB2	0	0	1	0	0	0	0	0	0	0	0	0	0	0	0	0	0	10307000	0	0	0	0	0	0	0	0	0	0	0	0
Q71U36;Q13748;Q6PEY2	TUBA1A;TUBA3C;TUBA3E	26	14	23	8	13	28	17	23	21	16	15	19	20	16	16	483010000	0	313620000	0	0	486910000	0	127700000	0	0	264140000	0	0	0	0
Q7KZ85	SUPT6H	3	0	1	0	0	1	1	2	1	2	0	0	0	0	1	0	0	0	0	0	0	0	0	0	16406000	0	0	0	0	0
Q7KZI7;Q96L34	MARK2	1	0	0	0	0	1	0	0	0	0	2	0	0	0	0	0	0	0	0	0	0	0	0	0	0	0	0	0	0	0
Q7L0Y3	TRMT10C	8	0	8	0	1	8	0	5	2	0	7	1	6	1	1	126950000	0	100660000	0	0	187690000	0	87074000	53052000	0	132600000	0	104980000	0	0
Q7L2H7	EIF3M	5	0	6	0	0	9	0	3	3	0	5	0	2	0	0	114300000	0	75193000	0	0	227110000	0	54371000	0	0	130280000	0	59018000	0	0
Q7L2J0	MEPCE	1	0	1	0	0	2	0	2	0	0	0	0	0	0	0	17807000	0	0	0	0	0	0	0	0	0	0	0	0	0	0
Q7L4I2	RSRC2	0	0	1	0	0	0	1	2	1	2	0	0	0	1	1	0	0	0	0	0	0	0	31535000	0	84948000	0	0	0	0	0
Q7L576;Q96F07	CYFIP1	15	0	11	0	0	12	1	10	11	0	3	3	1	0	0	160390000	0	131870000	0	0	162430000	0	103150000	101150000	0	66407000	45238000	0	0	0
Q7L592	NDUFAF7	3	0	1	0	0	3	0	0	0	0	2	0	0	0	0	0	0	0	0	0	17672000	0	0	0	0	0	0	0	0	0
Q7L5D6	GET4	0	0	0	0	0	2	0	0	1	0	0	0	0	0	0	0	0	0	0	0	20483000	0	0	0	0	0	0	0	0	0
Q7L5L3	GDPD3	0	2	1	2	2	0	1	2	1	1	0	2	1	1	1	0	0	0	0	63755000	0	0	8745700	0	0	0	28018000	0	0	0
Q7L5N1	COPS6	6	0	6	0	1	4	0	2	1	0	2	0	0	0	0	57346000	0	36435000	0	0	53266000	0	41075000	0	0	72979000	0	0	0	0
Q7L775	EPM2AIP1	0	0	0	0	0	1	0	0	0	0	0	0	0	0	0	0	0	0	0	0	15571000	0	0	0	0	0	0	0	0	0
Q7L8L6	FASTKD5	2	0	2	0	1	1	0	0	1	0	1	0	1	0	0	15466000	0	0	0	0	0	0	0	0	0	0	0	0	0	0
Q7L9B9	EEPD1	2	0	0	0	0	0	0	0	0	0	1	0	0	0	0	11155000	0	0	0	0	0	0	0	0	0	0	0	0	0	0
Q9H8S9;Q7L9L4	MOB1A;MOB1B	2	0	2	0	0	1	0	1	1	0	0	0	1	0	0	0	0	0	0	0	0	0	0	4781300	0	0	0	0	0	0
Q7LG56	RRM2B	0	0	0	0	0	1	0	0	0	0	1	0	0	0	0	0	0	0	0	0	5886300	0	0	0	0	0	0	0	0	0
Q7RTP0	NIPA1	1	0	2	0	0	2	0	1	2	0	1	0	2	2	1	0	0	14948000	0	0	0	0	0	0	0	0	0	0	0	0
Q7RTP6	MICAL3	0	0	0	0	0	0	0	0	0	0	0	0	1	0	0	0	0	0	0	0	0	0	0	0	0	0	0	0	0	0
Q7RTV0	PHF5A	2	0	2	0	0	2	0	0	1	0	3	0	0	0	0	38818000	0	0	0	0	37677000	0	0	0	0	36471000	0	0	0	0
Q7Z2K6	ERMP1	1	0	3	1	0	3	1	5	3	3	0	2	1	1	0	0	0	11842000	0	0	17534000	0	16523000	26145000	0	0	0	0	0	0
Q7Z2K8	GPRIN1	0	0	0	0	0	0	0	0	0	0	0	0	0	0	0	0	0	0	0	0	0	0	0	0	0	0	0	0	0	0
Q7Z2W4	ZC3HAV1	12	1	11	1	1	7	1	7	3	0	6	0	6	1	0	118880000	0	107400000	0	0	55595000	0	77829000	38934000	0	64778000	0	81304000	0	0
Q7Z2W9	MRPL21	3	0	1	0	0	4	0	1	1	0	2	0	2	0	0	47760000	0	0	0	0	32090000	0	0	0	0	43262000	0	16019000	0	0
Q7Z2Z2	EFTUD1	1	0	0	0	0	3	0	0	0	0	0	0	0	0	0	0	0	0	0	0	16090000	0	0	0	0	0	0	0	0	0
Q7Z3B4	NUP54	0	0	1	0	0	2	0	1	1	0	0	0	2	0	0	0	0	0	0	0	0	0	0	0	0	0	0	0	0	0
Q7Z3C6	ATG9A	0	0	1	0	0	1	0	1	1	0	0	0	1	0	1	0	0	0	0	0	0	0	0	0	0	0	0	3198100	0	0
Q7Z3K3	POGZ	1	0	1	0	0	1	0	2	0	0	0	0	1	0	0	0	0	0	0	0	0	0	6957700	0	0	0	0	0	0	0
Q7Z3U7	MON2	2	0	1	0	0	6	0	1	1	0	1	0	0	0	0	0	0	0	0	0	47051000	0	0	0	0	0	0	0	0	0
Q7Z406	MYH14	7	7	12	1	6	7	4	7	4	4	5	28	6	6	4	0	72627000	145710000	0	0	0	99045000	112020000	0	0	0	545400000	143820000	54184000	0
Q7Z417	NUFIP2	0	0	0	0	0	2	1	3	1	0	1	0	1	0	0	0	0	0	0	0	15165000	0	17100000	0	0	0	0	0	0	0
Q7Z460	CLASP1	2	0	0	0	0	5	0	1	0	0	0	0	0	0	0	0	0	0	0	0	20490000	0	0	0	0	0	0	0	0	0
Q7Z4F1	LRP10	1	0	1	0	0	0	0	0	0	0	0	0	0	0	0	0	0	0	0	0	0	0	0	0	0	0	0	0	0	0
Q7Z4H8	KDELC2	3	0	3	0	0	4	0	2	2	0	1	0	2	0	0	38199000	0	0	0	0	38813000	0	0	0	0	0	0	0	0	0
Q7Z4W1	DCXR	1	2	3	1	1	0	1	1	1	1	0	1	1	1	0	0	33662000	25148000	0	0	0	0	0	0	0	0	0	0	0	0
Q7Z6B7	SRGAP1	2	0	2	0	0	2	0	1	1	1	0	1	2	0	1	0	0	0	0	0	17387000	0	0	0	0	0	0	0	0	0
Q7Z6E9	RBBP6	0	1	3	0	3	0	0	3	2	3	0	0	1	4	0	0	0	0	0	39702000	0	0	27114000	21728000	59201000	0	0	0	0	0
Q7Z6Z7;A5YM72	HUWE1	12	0	11	0	0	22	1	8	6	0	3	1	3	0	0	111710000	0	50458000	0	0	204230000	0	34578000	31035000	0	42980000	0	21278000	0	0
Q7Z739	YTHDF3	3	0	3	0	2	5	2	9	4	3	4	1	8	3	1	42072000	0	93587000	0	0	63451000	0	176970000	94648000	131950000	87475000	0	196240000	0	0
Q7Z7A1	CNTRL	1	1	2	0	1	0	0	0	0	0	0	0	0	0	1	0	0	0	0	0	0	0	0	0	0	0	0	0	0	0
Q7Z7H5	TMED4	2	0	2	0	0	2	0	0	1	0	2	0	0	0	0	0	0	0	0	0	0	0	0	0	0	50133000	0	0	0	0
Q7Z7H8	MRPL10	2	0	2	0	0	3	0	2	1	0	2	0	3	0	0	21514000	0	16347000	0	0	29571000	0	0	0	0	25027000	0	21199000	0	0
Q7Z7N9	TMEM179B	1	0	0	0	0	0	0	0	0	0	0	0	0	0	0	0	0	0	0	0	0	0	0	0	0	0	0	0	0	0
Q86SF2	GALNT7	1	0	1	0	0	0	0	0	0	0	0	0	0	0	0	0	0	0	0	0	0	0	0	0	0	0	0	0	0	0
Q86SG5	S100A7A	0	3	3	3	3	0	3	3	3	3	0	4	3	2	3	0	0	0	0	0	0	0	0	0	0	0	31364000	0	0	0
Q86SX6	GLRX5	0	0	0	0	0	1	0	0	0	0	0	0	0	0	0	0	0	0	0	0	0	0	0	0	0	0	0	0	0	0
Q86T03	TMEM55B	1	0	1	0	0	0	0	0	0	0	0	0	0	0	0	0	0	3083600	0	0	0	0	0	0	0	0	0	0	0	0
Q86TB9	PATL1	0	0	2	0	0	0	0	0	0	0	1	0	0	0	0	0	0	0	0	0	0	0	0	0	0	0	0	0	0	0
Q86TI2	DPP9	3	0	4	0	0	3	0	1	1	0	0	0	0	0	0	0	0	23606000	0	0	23521000	0	0	0	0	0	0	0	0	0
Q86TM6	SYVN1	1	3	2	0	1	2	0	2	1	0	0	0	1	0	0	0	0	0	0	0	10649000	0	0	0	0	0	0	0	0	0
Q86TX2;P49753	ACOT1;ACOT2	3	0	3	0	1	5	0	2	4	0	7	0	6	1	0	56084000	0	54553000	0	0	56430000	0	47773000	43533000	0	98903000	0	70082000	0	0
Q86U38	NOP9	0	0	1	0	0	2	0	3	2	0	0	0	1	0	0	0	0	0	0	0	17978000	0	9198900	0	0	0	0	0	0	0
Q86U42;A6NDY0	PABPN1	3	0	2	0	1	3	0	2	2	2	1	0	2	2	1	93343000	0	36882000	0	0	132760000	0	42188000	50198000	0	0	0	58154000	0	0
Q86UK7	ZNF598	0	0	1	0	0	2	0	0	0	0	0	0	0	0	0	0	0	0	0	0	0	0	0	0	0	0	0	0	0	0
Q86UT6	NLRX1	0	0	0	0	0	0	0	0	0	0	0	3	0	0	0	0	0	0	0	0	0	0	0	0	0	0	46085000	0	0	0
Q86UY8	NT5DC3	5	0	3	0	0	4	0	1	1	0	3	0	1	0	0	59724000	0	39811000	0	0	35672000	0	0	0	0	83197000	0	0	0	0
Q86V21	AACS	0	0	0	0	0	0	0	0	0	0	0	0	0	0	0	0	0	0	0	0	0	0	0	0	0	0	0	0	0	0
Q86V48	LUZP1	1	0	1	0	0	2	0	4	2	0	0	0	2	0	0	0	0	0	0	0	12500000	0	16468000	0	0	0	0	0	0	0
Q86VP1	TAX1BP1	0	0	0	0	0	0	0	0	0	0	0	0	0	0	0	0	0	0	0	0	0	0	0	0	0	0	0	0	0	0
Q86VP6	CAND1	18	3	21	0	6	23	7	18	19	7	10	9	12	7	1	656930000	0	493010000	0	132900000	695170000	158170000	394300000	400490000	158350000	420550000	253660000	317060000	137400000	0
Q86VU5	COMTD1	0	0	0	0	0	1	0	0	0	0	1	0	0	0	0	0	0	0	0	0	0	0	0	0	0	0	0	0	0	0
Q86VY4	TSPYL5	1	0	2	0	0	2	0	2	1	0	1	0	0	0	0	0	0	10528000	0	0	0	0	13008000	0	0	0	0	0	0	0
Q86W42	THOC6	2	0	2	0	0	2	0	2	2	1	0	0	2	0	0	0	0	0	0	0	0	0	12860000	9107600	0	0	0	0	0	0
Q86W56	PARG	2	0	0	0	0	3	0	3	2	1	0	0	1	0	0	23306000	0	0	0	0	17359000	0	18925000	19995000	0	0	0	0	0	0
Q86W92;Q8ND30	PPFIBP1;PPFIBP2	0	0	0	0	0	0	0	0	1	0	1	0	0	0	0	0	0	0	0	0	0	0	0	0	0	0	0	0	0	0
Q86WA6	BPHL	1	0	1	0	0	1	0	1	1	0	0	0	0	0	0	0	0	4013300	0	0	0	0	0	0	0	0	0	0	0	0
Q86WN1	FCHSD1	0	0	0	0	0	0	0	0	0	0	0	4	0	0	0	0	0	0	0	0	0	0	0	0	0	0	44048000	0	0	0
Q86WV6	TMEM173	3	0	2	0	0	1	0	1	0	0	3	0	1	0	0	13625000	0	22092000	0	0	0	0	0	0	0	36168000	0	0	0	0
Q86WX3	RPS19BP1	0	0	0	0	0	1	0	1	0	0	0	0	0	0	0	0	0	0	0	0	0	0	14234000	0	0	0	0	0	0	0
Q86X29	LSR	0	0	0	0	0	0	0	0	0	0	0	0	0	0	0	0	0	0	0	0	0	0	0	0	0	0	0	0	0	0
Q86X55	CARM1	8	1	4	0	2	7	0	4	3	2	1	0	3	0	0	138870000	0	62172000	0	31032000	75584000	0	76001000	45644000	0	0	0	32981000	0	0
Q86X83	COMMD2	2	0	0	0	0	2	0	0	0	0	0	0	0	0	0	20886000	0	0	0	0	0	0	0	0	0	0	0	0	0	0
Q86XP0	PLA2G4D	0	0	0	0	0	0	0	0	0	0	0	4	0	0	0	0	0	0	0	0	0	0	0	0	0	0	90503000	0	0	0
Q86Y39	NDUFA11	1	0	0	0	0	3	0	1	0	0	1	0	1	0	0	0	0	0	0	0	59584000	0	0	0	0	0	0	0	0	0
Q86Y56	DNAAF5	4	0	4	0	0	4	0	1	1	0	0	0	1	0	0	27501000	0	21709000	0	0	0	0	0	0	0	0	0	0	0	0
Q86Y82	STX12	3	0	3	0	0	2	0	0	0	0	0	0	0	0	0	49277000	0	0	0	0	47947000	0	0	0	0	0	0	0	0	0
Q86YS6	RAB43	0	0	0	0	0	1	0	0	0	0	0	0	0	0	0	0	0	0	0	0	0	0	0	0	0	0	0	0	0	0
Q8IUC0	KRTAP13-1	0	0	1	1	1	0	0	1	0	2	0	0	0	0	0	0	0	0	0	0	0	0	0	0	18032000	0	0	0	0	0
Q8IUC1	KRTAP11-1	0	0	0	1	2	0	0	0	0	2	0	0	0	0	1	0	0	0	0	0	0	0	0	0	383430000	0	0	0	0	0
Q8IUD2	ERC1	0	0	0	0	0	0	0	0	0	0	0	0	0	0	0	0	0	0	0	0	0	0	0	0	0	0	0	0	0	0
Q8IUF8	MINA	1	0	1	0	0	1	0	0	0	0	0	0	0	0	0	8430400	0	0	0	0	0	0	0	0	0	0	0	0	0	0
Q8IUG1;P0C5Y4;Q07627	KRTAP1-3;KRTAP1-4;KRTAP1-1	0	0	0	2	0	0	0	0	0	1	0	0	0	0	1	0	0	0	35985000	0	0	0	0	0	0	0	0	0	0	0
Q8IUR0	TRAPPC5	1	0	0	0	0	3	0	0	0	0	1	0	0	0	0	0	0	0	0	0	0	0	0	0	0	7481800	0	0	0	0
Q8IUR7	ARMC8	1	0	1	0	0	0	0	0	0	0	0	0	0	0	0	0	0	0	0	0	0	0	0	0	0	0	0	0	0	0
Q8IUX1	TMEM126B	0	0	0	0	0	0	0	0	0	0	0	0	0	0	0	0	0	0	0	0	0	0	0	0	0	0	0	0	0	0
Q8IV38	ANKMY2	1	0	1	0	0	0	0	0	0	0	0	0	0	0	0	0	0	4998500	0	0	0	0	0	0	0	0	0	0	0	0
Q8IVD9	NUDCD3	1	0	0	0	0	1	0	0	0	0	0	0	0	0	0	0	0	0	0	0	0	0	0	0	0	0	0	0	0	0
Q8IVM0	CCDC50	2	0	4	0	0	3	1	1	2	1	0	0	1	1	1	18903000	0	28222000	0	0	20090000	0	0	26119000	0	0	0	0	0	0
Q8IVS2	MCAT	0	0	2	0	0	3	0	1	1	1	2	0	2	0	0	0	0	0	0	0	13921000	0	0	0	0	14524000	0	0	0	0
Q8IW75	SERPINA12	0	11	8	5	7	0	4	5	5	3	0	6	2	7	1	0	409540000	120950000	297720000	217330000	0	140520000	64209000	98170000	119610000	0	196060000	42300000	237070000	0
Q8IWA0	WDR75	0	0	1	0	0	0	0	3	0	0	0	0	0	0	0	0	0	0	0	0	0	0	23081000	0	0	0	0	0	0	0
Q8IWA4	MFN1	0	0	1	0	0	1	0	2	1	0	0	0	1	0	0	0	0	0	0	0	0	0	0	0	0	0	0	3620300	0	0
Q8IWA5	SLC44A2	0	0	1	0	0	0	0	1	1	0	0	0	0	0	0	0	0	8963800	0	0	0	0	0	0	0	0	0	0	0	0
Q8IWB7	WDFY1	1	0	4	0	0	1	0	1	0	0	0	0	0	0	0	0	0	15038000	0	0	0	0	0	0	0	0	0	0	0	0
Q8IWE2	FAM114A1	0	0	1	0	0	3	0	0	0	0	0	0	0	0	0	0	0	0	0	0	8741900	0	0	0	0	0	0	0	0	0
Q8IWJ2	GCC2	0	0	1	0	0	0	0	0	0	0	0	0	0	0	0	0	0	2037100	0	0	0	0	0	0	0	0	0	0	0	0
Q8IWS0	PHF6	1	0	0	0	0	1	1	3	0	0	0	0	1	0	0	0	0	0	0	0	0	0	70352000	0	0	0	0	0	0	0
Q8IWT6;Q8TDW0	LRRC8A	2	0	0	0	0	1	0	1	0	0	0	0	1	0	0	9559900	0	0	0	0	0	0	0	0	0	0	0	0	0	0
Q8IWU5	SULF2	0	0	0	0	0	2	0	0	0	0	0	0	0	0	0	0	0	0	0	0	27470000	0	0	0	0	0	0	0	0	0
Q8IWV7	UBR1	1	0	0	0	0	3	0	0	0	0	1	0	0	0	0	0	0	0	0	0	24217000	0	0	0	0	0	0	0	0	0
Q8IWV8	UBR2	0	0	0	0	0	0	0	0	0	0	0	0	0	0	0	0	0	0	0	0	0	0	0	0	0	0	0	0	0	0
Q8IWX8	CHERP	5	0	6	0	0	5	0	7	5	8	2	0	4	3	1	50867000	0	36224000	0	0	43203000	0	81492000	69516000	138650000	69093000	0	73300000	88659000	0
Q8IX01	SUGP2	0	0	0	0	0	0	0	4	0	2	0	0	0	0	0	0	0	0	0	0	0	0	21508000	0	0	0	0	0	0	0
Q8IXB1	DNAJC10	2	0	1	0	0	3	0	1	1	0	1	0	0	0	0	0	0	0	0	0	25045000	0	0	0	0	0	0	0	0	0
Q8IXH7	NELFCD	0	0	0	0	0	2	0	1	1	0	0	0	1	0	0	0	0	0	0	0	0	0	4889500	0	0	0	0	0	0	0
Q8IXI1	RHOT2	1	0	1	0	0	3	0	0	0	0	0	0	0	0	0	0	0	0	0	0	13014000	0	0	0	0	0	0	0	0	0
Q8IXI2	RHOT1	1	0	3	0	0	0	0	1	1	0	0	0	0	0	0	0	0	11729000	0	0	0	0	0	0	0	0	0	0	0	0
Q8IXJ6	SIRT2	0	0	1	0	0	1	0	0	0	0	0	0	0	0	0	0	0	0	0	0	3960700	0	0	0	0	0	0	0	0	0
Q8IXK0;Q8NDX5	PHC2	1	0	3	0	0	1	0	2	2	0	2	0	3	0	0	0	0	11984000	0	0	0	0	29603000	19998000	0	0	0	24882000	0	0
Q8IXM3	MRPL41	1	0	1	0	0	2	0	1	0	0	1	0	0	0	0	0	0	0	0	0	26064000	0	0	0	0	0	0	0	0	0
Q8IXQ6	PARP9	15	0	15	0	2	1	0	1	0	0	0	0	2	0	0	336100000	0	270660000	0	0	0	0	0	0	0	0	0	14222000	0	0
Q8IY17	PNPLA6	8	0	5	0	2	14	0	9	8	0	7	0	8	1	0	198610000	0	86566000	0	39833000	237310000	0	100590000	107360000	0	198700000	0	118260000	0	0
Q8IY21	DDX60	1	0	1	0	0	1	0	0	0	0	0	0	0	0	0	0	0	0	0	0	0	0	0	0	0	0	0	0	0	0
Q8IY81	FTSJ3	4	0	6	0	0	6	2	6	5	2	1	0	4	0	0	30259000	0	30606000	0	0	32304000	27867000	44716000	30049000	28248000	0	0	32662000	0	0
Q8IY95	TMEM192	0	0	0	0	0	0	0	0	0	0	0	0	0	0	0	0	0	0	0	0	0	0	0	0	0	0	0	0	0	0
Q8IYB1	MB21D2	1	0	0	0	0	2	0	0	0	0	0	0	0	0	0	0	0	0	0	0	12220000	0	0	0	0	0	0	0	0	0
Q8IYB8	SUPV3L1	8	0	5	0	0	9	1	6	5	3	4	1	7	1	1	52146000	0	79618000	0	0	61821000	0	50537000	45240000	50864000	61665000	0	71230000	0	0
Q8IYD1	GSPT2	6	0	4	0	0	7	2	7	5	2	4	0	2	0	0	0	0	0	0	0	0	0	0	0	0	0	0	17048000	0	0
Q8IYI6	EXOC8	1	0	1	0	0	3	0	0	0	0	0	0	0	0	0	0	0	0	0	0	18216000	0	0	0	0	0	0	0	0	0
Q8IYL3	C1orf174	0	0	0	0	0	0	1	1	1	1	0	0	1	0	0	0	0	0	0	0	0	17738000	0	0	0	0	0	0	0	0
Q8IYM9	TRIM22	0	1	1	1	1	0	1	1	0	0	0	1	1	1	2	0	0	0	0	0	0	0	65537000	0	0	0	212980000	136900000	0	0
Q8IYT4	KATNAL2	1	1	1	1	1	1	1	1	1	1	1	1	1	1	1	0	0	0	0	0	0	0	0	0	0	0	260960000	0	0	0
Q8IZ73	RPUSD2	1	0	0	0	0	2	0	0	0	0	1	0	0	0	0	0	0	0	0	0	18585000	0	0	0	0	0	0	0	0	0
Q8IZ81	ELMOD2	1	0	1	0	0	1	0	1	1	0	1	0	1	0	0	0	0	0	0	0	0	0	0	0	0	0	0	0	0	0
Q8IZL8	PELP1	4	0	1	0	0	10	0	1	2	0	6	0	1	0	0	26577000	0	0	0	0	158290000	0	9112600	18559000	0	66298000	0	0	0	0
Q8IZP0	ABI1	1	0	2	0	0	1	0	1	1	0	0	1	1	0	0	0	0	0	0	0	0	0	0	0	0	0	29292000	0	0	0
Q8IZV5	RDH10	2	0	2	0	0	1	0	0	0	0	0	0	0	0	0	0	0	17434000	0	0	0	0	0	0	0	0	0	0	0	0
Q8N0U8	VKORC1L1	0	1	1	0	1	2	0	3	0	0	0	0	2	1	0	0	0	0	0	0	38294000	0	27678000	0	0	0	0	35907000	0	0
Q8N122	RPTOR	1	0	0	0	0	2	0	1	1	0	0	0	0	0	0	0	0	0	0	0	0	0	0	0	0	0	0	0	0	0
Q8N1B4	VPS52	1	0	1	0	0	2	0	0	0	0	0	0	0	0	0	0	0	0	0	0	0	0	0	0	0	0	0	0	0	0
Q8N1F7	NUP93	7	0	12	1	0	15	1	15	8	1	4	0	7	1	0	85068000	0	154210000	0	0	156600000	0	128310000	107010000	0	70126000	0	128750000	0	0
[truncated: 1,983 more rows]

## Sheet: NORAD Proteins
Protein IDs	Gene names	Norad I/Lysate I	Norad II/Lysate II	Norad III/Lysate III	Norad I/Scramb I	Norad II/Scramb II	Norad III/Scramb III
Q9P0V9	Septin10				31.211		32.0089
P24666	ACP1				14.4856	8.90469
O60488	ACSL4				18.724		14.7716
P55263	ADK				18.503		24.0692
O00116	AGPS				20.1934		15.8491
Q12904	AIMP1				19.2746	9.71731
Q02952	AKAP12				20.3178		13.4163
Q9Y2D5	AKAP2				60.9556		8.04174
Q9BYJ1	ALOXE3	31.1768	116.585
O14617	AP3D1				13.0316		16.1187
Q52LW3	ARHGAP29				21.7916		11.1931
Q13510	ASAH1	34.6517	64.5938
P54709	ATP1B3				16.9152		22.9549
P20020;Q16720;Q01814	ATP2B1				18.9719		15.0999
Q9NYF8	BCLAF1		23.1958	104.901	23.8901
Q86X55	CARM1				16.2232	9.72601
P13987	CD59					37.9924	80.6962
Q86X02	CDR2L	12.2043	63.7092	20.8605
Q5SW79;Q96L14	CEP170		33.5504	12.5508	8.32137		9.6208
Q9UI42	CPA4	25.7857	57.1261
Q16630	CPSF6				23.2766		46.051
P81605	DCD	519.807	908.983	168.493
Q9BUQ8	DDX23				24.8386		50.7091
Q96GQ7	DDX27		86.0193		11.5763	8.63671
Q86XP3	DDX42			39.6526	19.2615		30.3957
Q96EY1	DNAJA3			14.4236	11.9325		11.0564
P23919	DTYMK				23.2163	11.7478
O43237	DYNC1LI2				23.3207		15.2615
P23588	EIF4B				20.746		36.529
Q15006	EMC2				11.7598		21.8083
Q9Y2J2	EPB41L3				11.7715	10.3204
P10768	ESD				21.3206	12.5092
P62495	ETF1				23.7727	10.7517
Q8NCA5	FAM98A				12.0591		13.5804
Q9UN86	G3BP2			13.9282	11.0438		10.6767
Q9HCG7	GBA2				12.7075		23.3438
Q96RP9	GFM1				18.4521		24.7997
P63092;Q5JWF2;P38405	GNAS				23.1595		21.0074
Q08378	GOLGA3				9.05253		14.4773
P62993	GRB2				12.8022	8.31781
Q9BZE4	GTPBP4		72.0334	10.0035
P07305	H1F0		9.95142	8.6561
P51610	HCFC1				19.3437		21.6481
Q92769	HDAC2				20.4449	13.1773
P55795	HNRNPH2			50.4043	17.651	15.7342
P00738;P00739	HP	13.0828	114.626
P01877	IGHA2	12.1618	28.5732
O00629	KPNA4				18.3146	11.9942
O15230	LAMA5	16.5461	242.627	138.833			106.423
Q15031	LARS2				18.4357		19.928
Q6P1A2	LPCAT3	11.4857		21.192	9.79777		16.2448
Q9HCE1	MOV10		8.11145	41.4604		28.3893
Q96DH6;O43347	MSI2				14.3274	9.41248
Q9HC84;P98088	MUC5B	12.5037	113.038
Q9BQG0	MYBBP1A				23.2915		17.394
O43795;Q9UBC5	MYO1B				23.1694	8.30539
Q969V3	NCLN				10.49		13.5062
O75306	NDUFS2	25.5636			21.8067		29.286
Q9Y697	NFS1				13.8609		11.6557
Q96D46	NMD3				16.1245	12.7001
Q8WUM0	NUP133				15.5053		13.4226
Q92621	NUP205				11.0855		14.1003
Q6L8Q7	PDE12				16.5804	11.1397
O75439	PMPCB				10.6975		22.8228
P30876	POLR2B			26.6015	13.2991		20.3914
Q99575	POP1					9.95099	9.7675
O14744	PRMT5			17.1993	19.1196	8.83238
O00232	PSMD12				24.0657	8.76648
P18031	PTPN1				14.7849		17.6344
Q96C36	PYCR2				22.8596	8.78682
Q9NTZ6	RBM12		85.4827		15.7749	8.58284
Q9BWF3	RBM4				12.1668		25.5898
Q6NUM9	RETSAT				11.3227		15.7116
Q9H1E1	RNASE7	20.6825	77.3484
Q63HN8	RNF213				11.9265		11.2269
Q14684	RRP1B		92.8204		8.6499	9.31957
Q92541	RTF1				16.3427	11.4303
P05109	S100A8	411.581	41.6024	240.027
Q14151	SAFB2		10.5308	8.98891
Q9Y512	SAMM50				17.501		28.9368
O43290	SART1		16.3015		20.9642		37.7849
Q99590	SCAF11		52.7403	14.4225			11.0556
Q9UGP8	SEC63				16.0181		19.0313
Q8IW75	SERPINA12	36.998	81.8387
P28370	SMARCA1			15.3755	10.7241		11.7861
O60264	SMARCA5				23.1381		26.3219
Q14683	SMC1A				19.5828		40.0152
Q2TAY7	SMU1				21.2374	18.7108
Q96DI7	SNRNP40				18.7626	10.0179
Q13425;Q13884	SNTB2				12.4437		12.5838
P18583	SON		41.5135	233.311			19.7909
P12931;P07948;P08631;Q9H3Y6;P42685;P06239	SRC				19.8862	9.03227
Q9Y3F4	STRAP			34.8381	18.8117		9.63339
Q15833	STXBP2			14.3293	12.3819		26.7052
Q8IYB8	SUPV3L1				20.7755		19.2795
Q9BZK7;O60907;Q9BQ87	TBL1XR1;TBL1X				10.7494		12.934
Q00059	TFAM			24.9829	14.2745		19.1507
P31483	TIA1				21.139		11.4814
Q6NUQ4	TMEM214				14.0459		30.4444
P42167	TMPO				33.8022
Q68CZ2	TNS3				17.6192		26.7201
O96008	TOMM40				21.2387		32.737
P61088;Q5JXB2	UBE2N;UBE2NL				23.547	8.27417
P14927	UQCRB				9.03531		15.4274
Q14694	USP10				11.0803		10.8244
P46939	UTRN				8.79863		13.2599
Q9H269	VPS16				17.5299		18.9558
Q9Y2W2	WBP11	8.36408	73.9045
O43592	XPOT				17.3045		14.1368
O75152	ZC3H11A		51.2605	12.5179			9.59563
Q9NVA2	Septin11				31.9286	13.7685	27.1721
A8K2U0	A2ML1	72.4664	127.079	20.7161
P49588	AARS				53.2448	13.995
P61221	ABCE1				40.9363		50.4006
Q9NUJ1	ABHD10				27.0125		66.2562
Q9Y305	ACOT9			38.106	22.2141	13.2426	29.2102
P55265	ADAR			13.4928	68.3349	22.4732	10.3429
Q53H12	AGK				27.6101		19.9415
Q9UKV8	AGO2					12.1896	13.91
O95994;Q8TD06	AGR2				31.0466		21.6113
Q8IVF2	AHNAK2				11.8967	49.323
O95831	AIFM1				101.981		114.47
O00170	AIP				39.1175	11.5854
O75342	ALOX12B		301.193	63.2781
P04745;P19961;P04746;CON__Q3MHH8	AMY1A;AMY2B;AMY2A	41.9473	177.42	38.2472
P15144	ANPEP				67.346	16.8245	23.0566
Q10567	AP1B1				28.1163	16.4214
Q9BXS5	AP1M1				25.8696	13.002	22.688
Q96CW1	AP2M1					27.9798	43.1305
Q9Y2T2;P53677	AP3M1				15.1316	10.5622	25.1684
P05067	APP				33.9431		25.016
P05089	ARG1	243.033	761.159	174.895
P31939	ATIC				35.3078	11.5669
P05023;Q13733	ATP1A1				145.769	46.2747	130.791
P24539	ATP5F1				43.1882	17.3825
O75947	ATP5H				40.7171	12.0033
Q8WWM7	ATXN2L				13.8306	12.3736	30.9749
P25311	AZGP1	334.312	619.287	168.628
O95817	BAG3				50.304	21.2216	30.3172
Q13867	BLMH	218.92	577.073	81.5755
P35613	BSG				90.6688	25.8721	58.2391
P30042	C21orf33					24.1547	52.5415
P27708	CAD				14.3121	25.8909	20.6836
Q13557	CAMK2D				34.0918		26.2862
Q13555	CAMK2G				8.60677	23.8271	81.1698
Q14444	CAPRIN1				34.324	14.2932
P31944	CASP14	261.084	466.785	86.0492
Q13185	CBX3					16.5647	26.9355
Q8IX12	CCAR1					12.8254	27.551
Q96CT7	CCDC124	32.7552			27.9414	16.0157	25.2791
Q96A33	CCDC47				34.0448		25.4057
Q99459	CDC5L				29.9324	39.2209	37.6766
Q9H5V8	CDCP1				8.69108	11.5925	45.2146
P21127;Q9UQ88	CDK11B;CDK11A				31.8086		37.1515
Q15517	CDSN	201.156	552.155	109.636
Q9Y281	CFL2				20.238	9.97812	22.881
Q14839	CHD4				21.1283	29.4477	32.9102
Q8IWX8	CHERP				9.45229	10.4287	19.8398
Q14008	CKAP5				27.5918	9.74662	21.863
Q9UDT6	CLIP2				90.3061		14.8333
A5YKK6	CNOT1				12.9105	9.61186	15.4344
Q9BT78	COPS4				23.6325	10.9694	16.7994
O75534	CSDE1				21.6071	16.8309	25.2157
P35222	CTNNB1				39.8768	15.0649
O60716	CTNND1				62.2655	17.2302
Q13617	CUL2				10.3649	34.7931	29.8977
P08574	CYC1				75.837	40.4661	74.3869
Q7L576;Q96F07	CYFIP1				34.4101	13.2003
Q16643	DBN1				39.0157	12.316
Q14203	DCTN1				35.1956	14.1627
Q13561	DCTN2				69.7962	14.6259
Q9Y394	DHRS7				23.8776	10.4237	25.2011
Q9Y2L1	DIS3					8.55686	11.3999
O60832	DKC1				65.509	16.502
P10515	DLAT				108.235	14.0505	8.22525
P36957	DLST				57.0023	13.3769
Q9NVH1	DNAJC11			27.2363	24.2794	9.80356	20.878
Q8WXX5	DNAJC9				37.3666	31.3711	41.0789
P50570;Q9UQ16	DNM2				69.1491	9.80186
P27487	DPP4	26.3663		25.2237	22.4915		19.3352
Q16555	DPYSL2				32.8367		16.8129
P30084	ECHS1				124.489	25.1056
O75521	ECI2				115.135	28.7323	100.817
Q16610	ECM1	55.1467	179.612
Q15075	EEA1				15.3407	8.25113	17.2048
Q9H223	EHD4				8.90952	12.0385	33.2215
O14681	EI24	31.3817	122.574	43.3389
Q99613;B5ME19	EIF3C;EIF3CL				82.0865	8.39787
O15371	EIF3D				36.2054	17.6742
Q14240	EIF4A2				32.4009	13.5331	28.9937
P78344	EIF4G2				32.3774		36.234
P55010	EIF5				29.3557	17.138
Q8N766	EMC1				27.9284	23.0081	28.7474
P07099	EPHX1				122.725	28.04	65.9178
P30040	ERP29				77.2904	23.5789	47.9863
A0FGR8	ESYT2				26.2166	9.41709	28.2872
Q9NVH0	EXD2				27.203		29.1479
Q96CS3	FAF2				26.6107	8.14453	20.3391
Q9NZB2;Q5T035	FAM120A				19.1775	19.7512	41.5092
Q9UK61	FAM208A		85.7937	23.2019		8.61406	17.7854
Q9Y285	FARSA				32.5053	8.33329
Q96AC1;Q9BQL6	FERMT2			28.255	24.0829	11.2312	21.6589
Q13642	FHL1				18.1873	11.8757	23.3584
Q00688	FKBP3				59.4134		46.4705
Q14315	FLNC				37.1122		194.982
O75955	FLOT1				21.5761	8.01349	19.2508
Q9NZ56	FMN2	957.572	4633.69	1169.45			15.5252
Q96I24	FUBP3				35.026	42.7581	76.9501
P10253	GAA				85.5518	10.3844	42.2969
Q04446	GBE1				54.7739	17.8163	21.7626
Q92616	GCN1L1				269.577	12.6751	23.7487
P49915	GMPS				22.8662	16.1667	23.252
P43304	GPD2				62.6543		8.92995
Q96QA5	GSDMA	146.906	490.39	91.1797
P42357	HAL	89.2876	265.135	49.6557
P69905	HBA1	39.2707	2038.54
P68871	HBB	8.97843	3138.24	22.8601		8.22873
Q7Z4V5;Q9Y3E1	HDGFRP2				15.4153	24.0536	35.4626
Q9BYK8	HELZ2		68.3385	14.866	54.299		11.3956
P05534;P30447	HLA-A					17.7485	56.6259
P37235;P84074;P61601	HPCAL1					10.5383	32.8912
P15428	HPGD				26.0841	13.2963
Q53GQ0	HSD17B12				84.341		47.02
P98160	HSPG2		37.1589	23.6007			18.1757
Q9Y4L1;Q9BXT5	HYOU1				16.453	25.0536
Q9Y6M1;Q9NZI8	IGF2BP2				22.7356	17.5807	119.704
P11717	IGF2R				33.382	12.6388	20.733
P01876	IGHA1	138.981	12.6989	157.17
P01857	IGHG1	315.5	864.768	70.845
P01859	IGHG2	17.1818	71.1336
P01834	IGKC	278.413	17.0174	67.6636
P0CG06;P0CG05;P0CF74;A0M8Q6	IGLC3;IGLC2;IGLC6;IGLC7	78.4191	320.49
O00410	IPO5				22.7817		17.56
O95373	IPO7				106.015		9.78594
P17301	ITGA2				48.2478	22.3913	35.3435
P23229	ITGA6				19.0804	15.7635	192.773
P16144	ITGB4				24.9792	21.8999	55.5135
Q14573;Q14643;Q14571	ITPR3				26.6759		11.3807
P49862	KLK7	35.8631	74.2193
Q8N9T8	KRI1			15.491		9.80177	11.8746
Q13601	KRR1					8.10294	15.6233
P11047	LAMC1	8.28454	175.431	69.8351			8.40973
Q14847	LASP1			34.5595	74.6001	24.4555	26.4916
O95202	LETM1				30.2429	12.1027	29.9491
Q08380	LGALS3BP				104.877		17.4899
P47929	LGALS7	206.675	595.618	89.1565
P49257	LMAN1				100.454	29.9992	76.1436
Q8WWI1	LMO7				98.9014	55.5566	14.9548
P02788	LTF	326.145	21.2305	153.748
P61626	LYZ	219.415		187.73
Q9Y5V3;Q96JG8	MAGED1					9.5457	22.7058
P55145	MANF				81.5098	16.0221	43.7152
P46821	MAP1B				27.7849		11.902
Q15691	MAPRE1				41.6564	14.9535
P56192	MARS				103.022		61.0134
Q9HCC0	MCCC2	19.2444		43.3848
P49736	MCM2				34.6293		23.5051
P25205	MCM3				48.4487		34.0335
P33992	MCM5				55.5019		33.3514
Q14566	MCM6				42.7681	27.8634	22.0468
P33993	MCM7				41.8887		25.4986
O94776;Q9BTC8	MTA2			23.0006	11.9357	9.76683	17.6311
Q9Y6C9	MTCH2				37.0274	14.9753	25.6997
Q7Z406	MYH14	44.5719	142.777	50.7821
O00159	MYO1C				61.9497	12.7852
Q9NZM1;REV__P24752	MYOF				14.6313		26.5001
Q99733	NAP1L4				35.493	8.88907
O43776	NARS				43.1021		17.9105
Q6ZVX7	NCCRP1	159.524	450.789	80.0254
Q9HCD5	NCOA5		330.635	53.8258			41.2602
P07196	NEFL				43.4126		64.3182
P48681	NES				12.2744		13.1464
Q14938;O00712	NFIX					11.6339	19.7848
P30419;O60551	NMT1				46.3351	23.7094
Q13423	NNT				17.7507	11.8443	35.6087
Q14978	NOLC1			38.5827	34.2197	50.1932	29.5756
P69849;Q5JPE7	NOMO3;NOMO2				31.3728		32.3418
P46087	NOP2				36.2028		41.0464
Q15738	NSDHL				38.4652	8.76648	24.1553
Q9UNZ2	NSFL1C				31.1119	8.06135
Q08J23	NSUN2				39.0836		36.0174
P21589	NT5E				47.1414		25.1667
Q9Y266	NUDC				79.3231	26.1204	35.92
O43809	NUDT21				46.1107		55.527
P49790	NUP153		121.854	29.7878	12.6645	12.2346	22.8339
O75694	NUP155				43.1021	19.2099	27.8677
Q8TEM1	NUP210				27.6074	13.0864	26.1649
Q8N1F7	NUP93				40.2395	16.4201	34.8482
P04181	OAT				73.7234	9.75849	49.7726
O60313	OPA1				67.2233	18.6455	52.8663
P22059;Q969R2	OSBP				14.2199	10.5885	19.911
P13674	P4HA1				17.8308	11.2266	125.369
Q13310;P0CB38	PABPC4			26.0874	18.5933	10.575	19.9973
P12004	PCNA				58.7454		36.5831
Q13442	PDAP1				26.5376	13.3155	23.4864
Q96HC4	PDLIM5				30.6813	18.7825
Q96HS1	PGAM5				19.4288	12.1924	32.017
O00264	PGRMC1				44.9704	14.1371	26.7252
P01833	PIGR	139.32	18.9776	16.7833
Q13526	PIN1			25.712	20.0258	13.7276	19.7096
P12273	PIP	163.366	384.996	108.884
Q5JRX3	PITRM1				42.2775	15.3029
Q96Q06	PLIN4	82.7475	112.034	37.2303		11.2488
Q02809	PLOD1				27.1221	13.7276	28.5389
Q9H307	PNN				69.3891		133.311
Q8IY17	PNPLA6				22.5885	12.8727	32.0089
Q8TCS8	PNPT1					12.0569	46.1566
Q8WVV4	POF1B	192.897	256.647	36.3299
Q9BY77	POLDIP3					8.13058	19.5228
O95602	POLR1A	25.9561	107.233	25.6015	22.1415	10.7667	19.6249
O15160	POLR1C				43.9084	20.7801
P30405	PPIF				24.4569	10.6135	21.0166
O60437	PPL	8.84932		15.8119
P10644;P31321	PRKAR1A				117.433	22.7419	43.4364
P13861;P31323	PRKAR2A			16.5559	27.3048		12.691
O43395	PRPF3			14.8402	9.21666	10.2694	11.3758
Q8WWY3	PRPF31				27.9806	17.6794
O75400	PRPF40A		14.9649		39.1697		65.5714
O94906	PRPF6				23.649	27.2901	33.4732
Q6P2Q9	PRPF8				123.55		9.81683
P48634	PRRC2A		26.3521	51.3698	12.0335	91.6601	195.602
Q9Y520	PRRC2C				61.7619	108.504	143.528
P62191	PSMC1				48.4826	17.0638
P17980	PSMC3				85.9927	14.5492
P62195	PSMC5				76.1344	19.4441
O00231	PSMD11				65.5585	17.7651
Q9UNM6	PSMD13				50.3197	11.0032
P55036;A2A3N6	PSMD4				43.7831		10.7468
P51665	PSMD7				34.2353	9.08346
Q14671	PUM1		90.3604	24.663		9.07259	18.9054
P49023	PXN				9.91716		92.213
P32322	PYCR1					8.19303	25.1364
P49792	RANBP2				33.5673	9.55709	19.4173
Q8IY67	RAVER1				20.6902	12.865	21.5111
Q16576	RBBP7				34.8068	23.0798	25.0863
Q8IXT5	RBM12B	50.8917	16.3284	196.819
P49756	RBM25				53.7771		9.37293
Q9P2N5	RBM27		204.262	46.4743		20.5088	35.625
Q8TC12	RDH11					19.7627	51.8053
P46063	RECQL				32.0121		36.7374
Q15287	RNPS1			40.2387		15.8762	30.845
Q9Y3U8	RPL36			75.4846	78.0341		57.8628
Q9P2E9	RRBP1	188.99	210.958	207.399
O43818	RRP9				14.4832	11.1279	16.7894
O76021	RSL1D1				47.3241		49.4533
Q9HCY8	S100A14	67.153	134.352
P06702	S100A9	468.141	1375.51	184.813
Q9Y3Z3	SAMHD1				18.5868	12.9866	28.8069
P82979	SARNP				39.4567		51.6754
P49591	SARS				34.6502	9.15078
Q15020	SART3				37.077		41.5742
Q9Y3A5	SBDS			39.8432	27.4326	11.399	30.5419
Q6UWP8	SBSN	200.116	343.012
O14828	SCAMP3				88.1064		10.6114
Q8NBX0	SCCPDH					9.14899	36.1555
P22307	SCP2				29.922	16.3254
Q14160;Q9BTT6	SCRIB				53.3466	11.162	36.4559
Q96KG9	SCYL1				22.8821	9.85309	22.6693
Q15436	SEC23A				98.8179	52.928	78.8908
Q96P63	SERPINB12	207.831	765.072	166.929
P29508	SERPINB3	187.581	662.354	58.6702
Q15637	SF1			37.0679	21.5103	20.2004	28.4144
Q12874	SF3A3				25.8281	14.6413
Q13435	SF3B2				13.1022		13.2703
P31947	SFN	115.919		60.6617
Q9H9B4	SFXN1				50.7032		54.8097
Q9BWM7	SFXN3				42.5097	13.1504	40.0476
P55011;Q13621	SLC12A2				63.5963		69.542
Q9UJS0	SLC25A13				39.428		69.2984
Q96QD8	SLC38A2				43.4178	23.2001	35.8253
P08195	SLC3A2				68.5959	14.9715
Q9Y6M7	SLC4A7				40.8188	11.3551	23.3124
Q9NWH9	SLTM		278.162	67.826			51.9921
Q9UQE7	SMC3				13.0256	22.9595	31.9602
A6NHR9	SMCHD1				25.9473		52.3764
O75643	SNRNP200				18.8732		15.0442
O60271;Q9UPT6	SPAG9				33.0687	8.23989	98.2461
Q01082;P11277	SPTBN1				23.41		9.62112
P37108	SRP14				62.4873		72.5627
Q9Y5M8	SRPRB				20.8123	11.539	25.7657
P05455	SSB				49.5238		35.6141
Q04837	SSBP1		16.5759	27.4962
Q08945	SSRP1				49.9074
P53597	SUCLG1				29.3088	13.4819	10.9841
Q9Y5B9	SUPT16H			94.3575	52.4724		9.0189
Q13428	TCOF1	23.6562	47.8102	52.8675
Q8WUY1	THEM6				36.2211	18.0761
Q9Y490	TLN1				17.7201		12.5505
Q99805	TM9SF2				24.2948	19.654	20.6033
Q92544	TM9SF4			27.8285	30.2638		21.3319
Q8WUH6	TMEM263	1867.18	14019	3159.46
Q15785	TOMM34				28.372		10.4593
O94826	TOMM70A					26.8089	95.0279
Q02880	TOP2B				25.8591		63.2382
Q12888	TP53BP1				16.0121	9.25085	18.7558
P12270	TPR		21.016	9.57042	137.176		152.076
Q7L0Y3	TRMT10C				26.2662	11.143	28.4144
Q71U36;Q13748;Q6PEY2	TUBA1A;TUBA3C;TUBA3E				81.836	16.342
Q9BQE3	TUBA1C			28.3062	25.0481	10.6953	21.6982
P68366	TUBA4A	39.8917		18.9301
Q3ZCM7	TUBB8			24.6121	74.2035	19.7077	18.8665
P0DN76;Q01081;Q8WU68	U2AF1				43.0734	49.9488	68.4107
O15042	U2SURP				17.281	42.163	21.6402
Q14157	UBAP2L			27.2565	23.2912	10.0537	20.8935
P54578	USP14				34.3606	13.615
Q93008;O00507	USP9X				42.0244	11.3281	25.2693
O95292	VAPB				46.0715	10.4908
Q9UNX4	WDR3			12.7947		8.79655	9.80783
O14980	XPO1				128.698	8.4487
Q9H0D6	XRN2				26.8429		49.0067
P49750	YLPM1	16.1102	211.4	48.6494
Q7Z739	YTHDF3					22.6472	53.1154
Q7Z2W4	ZC3HAV1				28.0249	9.95994	22.0062
O75844	ZMPSTE24				20.5146	17.7305	30.0655
Q14966	ZNF638	27.5388	612.659	196.706

## Sheet: NEAT1 Proteins
Protein IDs	Gene names	Neat I/Lysate I	Neat II/Lysate II	Neat III/Lysate III	Neat I/Scramb I	Neat II/Scramb II	Neat III/Scramb III
Q9UI42	CPA4	44.9482	80.7375
P81605	DCD	1510.05	904.956	315.215
P61626	LYZ	33.9574	9.22309
Q9HCD5	NCOA5	20.0603	112.901	31.6624			24.2708
P48681	NES				5.72867		7.20937
P05109	S100A8	1929.28	76.74	669.962
P06702	S100A9	2404.24	2429.45	596.554
Q86XZ4	SPATS2		69.5468	35.5284
A8K2U0	A2ML1	124.199	249.101	66.4489
Q9UKV3	ACIN1				10.059		10.9072
O75342	ALOX12B	222.327	356.191	159.97
Q9BYJ1	ALOXE3	68.19	124.832	65.5909
P04745;P19961;P04746;CON__Q3MHH8	AMY1A;AMY2B;AMY2A	84.2984	184.022	35.3766
Q96CW1	AP2M1					23.1988	29.9166
P05089	ARG1	410.235	894.453	294.195
Q13510	ASAH1		82.9692	33.6393
Q8WWM7	ATXN2L					10.5494	18.4361
P25311	AZGP1	419.626	958.946	296.035
Q9NYF8	BCLAF1		10.3751	98.1498
Q13867	BLMH	486.158	606.528	316.779
Q13555	CAMK2G					24.8688	31.2239
Q8IX12	CCAR1					13.2746	41.742
Q86X02	CDR2L		84.3496	40.0904		8.46907
Q9Y281	CFL2					9.87446	10.9839
O75521	ECI2					33.6464	23.1292
Q16610	ECM1	67.4803	206.582	80.6963
P29692	EEF1D	5.11044		5.77211
Q9NZ56	FMN2	372.641	1870.68	596.095			7.91356
P02751	FN1	140.114	5.44257	9.61512	8.2158		5.56806
Q53EP0	FNDC3B	16.3082	61.9886	25.9207	13.9115		19.8695
Q96I24	FUBP3					34.1276	82.3391
Q92616	GCN1L1					11.5169	5.74056
Q96QA5	GSDMA	420.238	564.633	298.256
P42357	HAL	94.9191	271.75	200.583
P68871	HBB	12.1508	375.156
Q7Z4V5;Q9Y3E1	HDGFRP2					18.3179	29.9681
Q00341	HDLBP	5.0878		6.96453
P52272	HNRNPM				5.62202		5.29833
P98160	HSPG2	52.4382	16.4245	10.4741	6.1139		8.06646
Q9Y6M1;Q9NZI8	IGF2BP2					13.7692	36.7997
P01876	IGHA1		13.7302	142.004
P01857	IGHG1		793.252	87.4369
P01834	IGKC		17.1973	56.1068
P23229	ITGA6					14.4313	36.51
O15230	LAMA5	133.202	124.467	16.8889			12.9462
P11047	LAMC1	59.888	77.5064	26.1378
P47929	LGALS7	429.078	917.905	307.712
P02788	LTF	111.291	20.6356	98.9089
Q86UE4	MTDH	6.20432		6.7808
Q9NZM1;REV__P24752	MYOF					6.2712	6.13159
Q6ZVX7	NCCRP1	118.164	565.997	259.112
Q15233	NONO		6.1033	12.5382	8.62958		8.17798
Q9Y266	NUDC					23.8591	27.754
P13674	P4HA1					11.1827	44.5759
P12273	PIP		702.529	69.1607
Q13835	PKP1	6.61722	6.2676	48.2669
Q9BY77	POLDIP3					11.5851	50.5549
O94906	PRPF6					13.4767	12.6966
Q9Y520	PRRC2C					34.3375	41.2846
Q8IXT5	RBM12B		8.08605	128.989
Q96PK6	RBM14			8.32641	5.03688		10.7633
Q96T37	RBM15		65.2056	45.9094			35.1919
P49756	RBM25				69.1647		11.6637
Q5T8P6	RBM26		56.4965	26.9238		5.67249	20.6385
Q9P2N5	RBM27	46.3277	255.411	135.694	39.5193	25.6443	104.017
Q9P2E9	RRBP1	249.913	360.181	412.306
Q9HCY8	S100A14	229.978	138.8	72.907
Q14151	SAFB2		6.33397	8.91691
Q6UWP8	SBSN	131.385	632.389	236.439
Q15436	SEC23A					37.2079	28.7176
Q8IW75	SERPINA12	91.0709	125.124	83.7082
Q96P63	SERPINB12	445.994	815.583	332.799
P29508	SERPINB3	358.906	1093.82	180.379
Q15637	SF1			69.5562		27.0815	53.3184
O75533	SF3B1				7.21462		6.52515
P31947	SFN	180.771		27.8733
P23246	SFPQ			8.55677	5.43668		6.23245
P55011;Q13621	SLC12A2					15.7239	28.5498
Q9NWH9	SLTM		165.783	42.7139			32.7424
P18583	SON	16.488	25.7154	321.567	5.96144		27.2774
O60271;Q9UPT6	SPAG9					8.1116	17.6766
Q9UQ35	SRRM2		7.69451	8.37524			8.62162
Q04837	SSBP1		5.68975	14.6652
Q92804	TAF15					5.16048	20.3838
Q13428	TCOF1		24.1218	44.0275
Q6NUQ4	TMEM214				38.1338		52.0489
Q8WUH6	TMEM263		4718.19	7078.14
P12270	TPR		11.2954	8.22818			130.748
O15042	U2SURP					22.0842	12.6942
P49750	YLPM1		137.092	82.2464			6.04009
Q96MU7	YTHDC1		238.79	160.298			6.93036
O75152	ZC3H11A		67.8401	42.1984		6.81145	32.3472
Q6PJT7	ZC3H14		7.56243	158.737		18.0607	121.68
Q14966	ZNF638		236.305	126.207

## Sheet: MALAT1-001 Proteins
Protein IDs	Gene names	Malat I/Lysate I	Malat II/Lysate II	Malat III/Lysate III	Malat I/Scramb I	Malat II/Scramb II	Malat III/Scramb III
P81605	DCD	1038.73		300.512
Q9BYK8	HELZ2		52.0329		42.3688	5.22434
O15230	LAMA5	22.9819	103.58
P05109	S100A8	789.055	82.8765	773.454
Q15637	SF1			58.9633		36.1649	45.1984
Q92804	TAF15					6.63472	26.1173
A8K2U0	A2ML1	118.409	274.185	48.8542
Q9UKV3	ACIN1	6.02851	5.24806	6.91066	21.5492		16.0024
O75342	ALOX12B	198.608	533.394	127.608
Q9BYJ1	ALOXE3	86.9383	243.799	46.9899
Q86V81	ALYREF				5.6096		5.24841
P04745;P19961;P04746;CON__Q3MHH8	AMY1A;AMY2B;AMY2A	142.07	342.693	73.7015
Q9BZZ5	API5	107.103			49.4977		5.19615
P05089	ARG1	527.515	1318.54	303.764
P25311	AZGP1	539.2	906.09	292.677
Q9NYF8	BCLAF1		44.0531	219.689	51.4782	5.9149	9.38984
Q13867	BLMH	521.03	948.558	237.884
Q9NP55	BPIFA1	111.725	7.32149
P21127;Q9UQ88	CDK11B;CDK11A		8.54008		82.4335	5.023	66.4131
Q86X02	CDR2L		114.892	31.113		11.5357
Q15517	CDSN	479.214	1074.61	270.375
Q9Y3Y2	CHTOP	92.7717		38.9817	79.1379		29.8814
Q16630	CPSF6				36.8317		96.3379
Q8N684	CPSF7			5.78005	8.88239		5.85433
Q9UBG3	CRNN	43.9295	140.343
A2AJT9	CXorf23	99.3913	117.713	39.5749	84.7846	11.8189	30.3362
Q9BUQ8	DDX23		5.80028		26.548		61.5953
Q7L014	DDX46		23.8859	19.9491	25.8568	6.91411	20.0976
Q7L2E3	DHX30					5.21369	12.1183
Q16610	ECM1	161.206	251.217
O14681	EI24	50.3625	146.218
Q9NZB2;Q5T035	FAM120A					12.6811	22.5483
Q9UK61	FAM208A	71.9892	216.014	79.3122	61.4096	21.6887	60.7968
Q9NZ56	FMN2	861.093	1482.7	215.73
Q96I24	FUBP3				33.6952	38.6079	79.083
O75223	GGCT	79.5448		63.9066
Q96QA5	GSDMA	322.015	720.245	251.033
P07305	H1F0	5.13174	11.1191	6.56949
P42357	HAL	181.285	436.973	102.775
P68871	HBB	20.0396	464.567
P16403	HIST1H1C	9.84194	5.81678
P55795	HNRNPH2		5.80785	118.121	31.7042	28.7233
Q9BUJ2	HNRNPUL1				65.0889		6.82213
Q1KMD3	HNRNPUL2				10.5781		7.00693
P98160	HSPG2	5.45226	9.48213
Q9Y6M1;Q9NZI8	IGF2BP2				15.1848	13.6763	69.9507
P01876	IGHA1	288.142	15.212	353.625
P01857	IGHG1	521.673	1033.92	171.611
P01834	IGKC	370.041	16.616	108.217
P49862	KLK7	69.2882	117.892
P47929	LGALS7	311.523	1120.47	310.25
P02788	LTF	779.511	20.3375	96.3243
O95232	LUC7L3	99.064	16.4594	179.602	6.21116		137.674
P61626	LYZ	452.418	10.6409
P43243	MATR3				7.73945		15.1519
Q86UE4	MTDH		6.53849	5.10805
Q09161	NCBP1				39.5507	23.6531
Q6ZVX7	NCCRP1	428.711	755.041	200.307
Q9HCD5	NCOA5	612.064	933.149	355.672	26.4302	8.82403	272.641
Q15233	NONO		6.97898	6.8217	6.92647
P01833	PIGR	267.823	16.7451
P12273	PIP	374.537	695.442	87.112
Q13835	PKP1	12.5802	11.1181	63.6272
Q9Y446	PKP3		69.9342	55.909
Q8WVV4	POF1B	353.094	532.208
Q8NEY8	PPHLN1		323.472	64.574		32.4781	49.4993
Q5VTL8	PRPF38B	26.879	397.181		22.9288	39.8787
O75400	PRPF40A		45.1877	10.4425	36.696	9.74119	169.726
Q13523	PRPF4B	86.8282	7.88896		5.77682		63.1246
O94906	PRPF6					22.1097	25.77
Q6P2Q9	PRPF8				55.7576		6.76612
Q9Y520	PRRC2C				16.8259	31.1433	26.3014
Q8WXF1	PSPC1				39.5898		5.97727
Q9NTZ6	RBM12		142.14		27.5474	14.2715
Q8IXT5	RBM12B	2604.17	65.4869	1723.77	13.6808	5.26532	18.2358
Q96T37	RBM15	227.714	365.469	110.476	194.249	9.401	84.6858
Q8NDT2	RBM15B	89.6241	194.384	59.0692	76.4528	19.517	45.2796
P49756	RBM25		10.2935		84.3279		19.7625
Q9P2N5	RBM27		257.692	53.6386		25.8734	41.1168
Q14498;Q86U06	RBM39		11.0997	7.26573	60.2589	5.15691	11.4292
P38159;O75526;Q8IZ40;Q8N7X1	RBMX	11.2572	10.0176	10.7286	5.72162		5.33155
Q96E39	RBMXL1	37.7719	115.328	51.9897	32.2209	11.5794	39.8528
Q9P2E9	RRBP1	405.906	445.706	328.652
Q9HCY8	S100A14	244.722	219.723
P06702	S100A9	1034.23	3151.88	672.363
Q15424	SAFB	120.386	18.8398	55.4701	10.7672		9.88886
Q14151	SAFB2	147.127	47.4058	53.0412	8.1916		7.8172
P82979	SARNP				56.3239		71.2824
Q6UWP8	SBSN	264.669	632.364	111.027
O14828	SCAMP3				41.8		9.457
Q13228	SELENBP1		89.5116	45.5669		8.98736	34.9294
Q96P63	SERPINB12	571.503	1282.47	291.487
P29508	SERPINB3	324.891	1461.29	345.863
O75533	SF3B1				5.78699		7.95423
P31947	SFN	88.1649		232.223
Q9NWH9	SLTM	1073.05	1409.42	543.766	9.70078		416.825
O75643	SNRNP200				5.13525		11.6458
P08621	SNRNP70		6.32681		5.80876		6.80163
P18583	SON	8.41692	89.9074	472.053		5.44998	40.0425
P22532	SPRR2D	363.097	735.591
Q9BYE4	SPRR2G	28.5837	67.6247
Q9UBC9	SPRR3	75.4978	373.321
Q8IYB3	SRRM1		8.25477		93.1999		6.63275
Q9UQ35	SRRM2		27.9397	11.8661		5.55994	12.2152
Q9BXP5	SRRT	7.46009	5.52129	18.9911	46.1809	7.36277	11.4909
Q07955	SRSF1	12.8475	9.50836	8.05497	5.09711		6.29359
O75494;Q8WXF0	SRSF10	51.3768	16.51	34.2331	10.0196		14.6107
Q08170	SRSF4	27.1399	74.0294		23.1514	7.43288
Q13243	SRSF5				54.4321		64.5726
Q13247	SRSF6	7.26911	9.68632	6.29159	8.30463		6.46046
Q16629	SRSF7	5.85453	6.93758	6.21589			5.29047
Q13242	SRSF9	13.3846	7.20911	8.27204	6.12256		7.69609
Q04837	SSBP1		149.208	317.167		23.471	53.7412
Q13148	TARDBP	6.2987		5.34872	315.946		5.06956
Q13428	TCOF1	24.3671	28.1989	20.0369
Q9Y2W1	THRAP3	5.02823	10.6168		6.88489		26.2951
Q8WUH6	TMEM263	3444.98	2157.59	2488.33
Q13595	TRA2A	68.6852	14.3395	216.934	349.242		8.22761
P62995	TRA2B	27.2293	10.7786	32.0114	5.5034		6.6433
P68366	TUBA4A	19.7271		51.1175
P0DN76;Q01081;Q8WU68	U2AF1					79.1904	124.798
P26368	U2AF2		5.66692		5.57705	5.3706
Q9H0D6	XRN2				27.0412		48.3868
P49750	YLPM1	89.5873	302.072	111.197	5.20861		8.16617
Q96MU7	YTHDC1	388.18	1146.13	360.369	13.4725	5.19786	15.5803
Q5T200	ZC3H13	30.293	125.588		25.8411	12.6096
Q14966	ZNF638	2286.96	3156.72	1547.01	15.2918	10.3836	30.0048
